# Supplementary material for: ent-Pimarane diterpenoids from the aerial parts of Sigesbeckia pubescens and their myocardial protective activity
Source: Royal Society of Chemistry journal article supplement (doi:10.1039/d5ra09664b), 2026-03-30

## SUPPORTING INFORMATION

### ***ent*-Pimarane diterpenoids from the aerial parts of *Sigesbeckia pubescens* and their myocardial protective activity**

Wanting Li <sup>a,1</sup>, Guiyang Xia <sup>a,b,1</sup>, Jinyu Xia <sup>b,c</sup>, Qiyao Liu <sup>b</sup>, Xuefen Wu <sup>b</sup>, Linnan Zhou <sup>a</sup>, Xiaohong Wei <sup>b</sup>, Huan Xia <sup>a,b\*</sup>, Sheng Lin <sup>a,b\*</sup>

<sup>a</sup> *School of Chinese Materia Medica, Beijing University of Chinese Medicine, Beijing, 102488, China*

<sup>b</sup> *Key Laboratory of Chinese Internal Medicine of Ministry of Education and Beijing, Dongzhimen Hospital, Beijing University of Chinese Medicine, Beijing, 100700, China*

<sup>c</sup> *Key Laboratory of Structure-Based Drug Design & Discovery, Ministry of Education, Wuyi college of innovation, Shenyang Pharmaceutical University, Shenyang, 110016, China*

\* Corresponding author at: Key Laboratory of Chinese Internal Medicine of Ministry of Education and Beijing, Dongzhimen Hospital, Beijing University of Chinese Medicine, Beijing, 100700, China

E-mail address: lsznn@126.com (S Lin); xiahuan@bucm.edu.cn (H Xia)

<sup>1</sup> These authors contributed equally to this work.

## Table of Contents

|                                                                                                          |    |
|----------------------------------------------------------------------------------------------------------|----|
| Table of Contents .....                                                                                  | 2  |
| 1. Spectroscopic Data .....                                                                              | 5  |
| Figure S1. HRESIMS (MeOH) spectrum of compound <b>1</b> .....                                            | 5  |
| Figure S2. <sup>1</sup> H NMR (700 MHz, CD <sub>3</sub> OD) spectrum of compound <b>1</b> .....          | 6  |
| Figure S3. <sup>13</sup> C NMR (150 MHz, CD <sub>3</sub> OD) spectrum of compound <b>1</b> .....         | 7  |
| Figure S4. HSQC (CD <sub>3</sub> OD) spectrum of compound <b>1</b> .....                                 | 8  |
| Figure S5. HMBC (CD <sub>3</sub> OD) spectrum of compound <b>1</b> .....                                 | 9  |
| Figure S6. <sup>1</sup> H- <sup>1</sup> H COSY (CD <sub>3</sub> OD) spectrum of compound <b>1</b> .....  | 10 |
| Figure S7. NOESY (CD <sub>3</sub> OD) spectrum of compound <b>1</b> .....                                | 11 |
| Figure S8. IR spectrum of compound <b>1</b> .....                                                        | 12 |
| Figure S9. UV spectrum of compound <b>1</b> .....                                                        | 12 |
| Figure S10. CD spectrum of compound <b>1</b> .....                                                       | 13 |
| Figure S11. HRESIMS (MeOH) spectrum of compound <b>2</b> .....                                           | 14 |
| Figure S12. <sup>1</sup> H NMR (600 MHz, CD <sub>3</sub> OD) spectrum of compound <b>2</b> .....         | 15 |
| Figure S13. <sup>13</sup> C NMR (150 MHz, CD <sub>3</sub> OD) spectrum of compound <b>2</b> .....        | 16 |
| Figure S14. HSQC (CD <sub>3</sub> OD) spectrum of compound <b>2</b> .....                                | 17 |
| Figure S15. HMBC (CD <sub>3</sub> OD) spectrum of compound <b>2</b> .....                                | 18 |
| Figure S16. <sup>1</sup> H- <sup>1</sup> H COSY (CD <sub>3</sub> OD) spectrum of compound <b>2</b> ..... | 19 |
| Figure S17. NOESY (CD <sub>3</sub> OD) spectrum of compound <b>2</b> .....                               | 20 |
| Figure S18. IR spectrum of compound <b>2</b> .....                                                       | 21 |
| Figure S19. UV spectrum of compound <b>2</b> .....                                                       | 21 |
| Figure S20. CD spectrum of compound <b>2</b> .....                                                       | 22 |
| Figure S21. HRESIMS (MeOH) spectrum of compound <b>3</b> .....                                           | 23 |
| Figure S22. <sup>1</sup> H NMR (600 MHz, CD <sub>3</sub> OD) spectrum of compound <b>3</b> .....         | 24 |
| Figure S23. <sup>13</sup> C NMR (150 MHz, CD <sub>3</sub> OD) spectrum of compound <b>3</b> .....        | 25 |
| Figure S24. HSQC (CD <sub>3</sub> OD) spectrum of compound <b>3</b> .....                                | 26 |
| Figure S25. HMBC (CD <sub>3</sub> OD) spectrum of compound <b>3</b> .....                                | 27 |
| Figure S26. <sup>1</sup> H- <sup>1</sup> H COSY (CD <sub>3</sub> OD) spectrum of compound <b>3</b> ..... | 28 |
| Figure S27. NOESY (CD <sub>3</sub> OD) spectrum of compound <b>3</b> .....                               | 29 |
| Figure S28. IR spectrum of compound <b>3</b> .....                                                       | 30 |
| Figure S29. UV spectrum of compound <b>3</b> .....                                                       | 30 |
| Figure S30. CD spectrum of compound <b>3</b> .....                                                       | 31 |
| Figure S31. HRESIMS (MeOH) spectrum of compound <b>4</b> .....                                           | 32 |
| Figure S32. <sup>1</sup> H NMR (700 MHz, CD <sub>3</sub> OD) spectrum of compound <b>4</b> .....         | 33 |
| Figure S33. <sup>13</sup> C NMR (150 MHz, CD <sub>3</sub> OD) spectrum of compound <b>4</b> .....        | 34 |
| Figure S34. HSQC (CD <sub>3</sub> OD) spectrum of compound <b>4</b> .....                                | 35 |
| Figure S35. HMBC (CD <sub>3</sub> OD) spectrum of compound <b>4</b> .....                                | 36 |
| Figure S36. <sup>1</sup> H- <sup>1</sup> H COSY (CD <sub>3</sub> OD) spectrum of compound <b>4</b> ..... | 37 |
| Figure S37. NOESY (CD <sub>3</sub> OD) spectrum of compound <b>4</b> .....                               | 38 |
| Figure S38. IR spectrum of compound <b>4</b> .....                                                       | 39 |
| Figure S39. UV spectrum of compound <b>4</b> .....                                                       | 39 |
| Figure S40. CD spectrum of compound <b>4</b> .....                                                       | 40 |
| Figure S41. HRESIMS (MeOH) spectrum of compound <b>5</b> .....                                           | 41 |

|                                                                                                          |    |
|----------------------------------------------------------------------------------------------------------|----|
| Figure S42. <sup>1</sup> H NMR (600 MHz, CD <sub>3</sub> OD) spectrum of compound <b>5</b> .....         | 42 |
| Figure S43. <sup>13</sup> C NMR (150 MHz, CD <sub>3</sub> OD) spectrum of compound <b>5</b> . ....       | 43 |
| Figure S44. HSQC (CD <sub>3</sub> OD) spectrum of compound <b>5</b> . ....                               | 44 |
| Figure S45. HMBC (CD <sub>3</sub> OD) spectrum of compound <b>5</b> . ....                               | 45 |
| Figure S46. <sup>1</sup> H- <sup>1</sup> H COSY (CD <sub>3</sub> OD) spectrum of compound <b>5</b> ..... | 46 |
| Figure S47. NOESY (CD <sub>3</sub> OD) spectrum of compound <b>5</b> .....                               | 47 |
| Figure S48. IR spectrum of compound <b>5</b> . ....                                                      | 48 |
| Figure S49. UV spectrum of compound <b>5</b> .....                                                       | 48 |
| Figure S50. CD spectrum of compound <b>5</b> . ....                                                      | 49 |
| Figure S51. HRESIMS (MeOH) spectrum of compound <b>6</b> . ....                                          | 50 |
| Figure S52. <sup>1</sup> H NMR (600 MHz, CD <sub>3</sub> OD) spectrum of compound <b>6</b> .....         | 51 |
| Figure S53. <sup>13</sup> C NMR (150 MHz, CD <sub>3</sub> OD) spectrum of compound <b>6</b> . ....       | 52 |
| Figure S54. HSQC (CD <sub>3</sub> OD) spectrum of compound <b>6</b> . ....                               | 53 |
| Figure S55. HMBC (CD <sub>3</sub> OD) spectrum of compound <b>6</b> . ....                               | 54 |
| Figure S56. <sup>1</sup> H- <sup>1</sup> H COSY (CD <sub>3</sub> OD) spectrum of compound <b>6</b> ..... | 55 |
| Figure S57. NOESY (CD <sub>3</sub> OD) spectrum of compound <b>6</b> .....                               | 56 |
| Figure S58. IR spectrum of compound <b>6</b> . ....                                                      | 57 |
| Figure S59. UV spectrum of compound <b>6</b> .....                                                       | 57 |
| Figure S60. CD spectrum of compound <b>6</b> . ....                                                      | 58 |
| Figure S61. HRESIMS (MeOH) spectrum of compound <b>7</b> . ....                                          | 59 |
| Figure S62. <sup>1</sup> H NMR (600 MHz, CD <sub>3</sub> OD) spectrum of compound <b>7</b> .....         | 60 |
| Figure S63. <sup>13</sup> C NMR (150 MHz, CD <sub>3</sub> OD) spectrum of compound <b>7</b> . ....       | 61 |
| Figure S64. HSQC (CD <sub>3</sub> OD) spectrum of compound <b>7</b> . ....                               | 62 |
| Figure S65. HMBC (CD <sub>3</sub> OD) spectrum of compound <b>7</b> . ....                               | 63 |
| Figure S66. <sup>1</sup> H- <sup>1</sup> H COSY (CD <sub>3</sub> OD) spectrum of compound <b>7</b> ..... | 64 |
| Figure S67. NOESY (CD <sub>3</sub> OD) spectrum of compound <b>7</b> .....                               | 65 |
| Figure S68. IR spectrum of compound <b>7</b> . ....                                                      | 66 |
| Figure S69. UV spectrum of compound <b>7</b> .....                                                       | 66 |
| Figure S70. CD spectrum of compound <b>7</b> . ....                                                      | 67 |
| Figure S71. HRESIMS (MeOH) spectrum of compound <b>8</b> . ....                                          | 68 |
| Figure S72. <sup>1</sup> H NMR (600 MHz, CD <sub>3</sub> OD) spectrum of compound <b>8</b> .....         | 69 |
| Figure S73. <sup>13</sup> C NMR (150 MHz, CD <sub>3</sub> OD) spectrum of compound <b>8</b> . ....       | 70 |
| Figure S74. HSQC (CD <sub>3</sub> OD) spectrum of compound <b>8</b> .....                                | 71 |
| Figure S75. HMBC (CD <sub>3</sub> OD) spectrum of compound <b>8</b> . ....                               | 72 |
| Figure S76. <sup>1</sup> H- <sup>1</sup> H COSY (CD <sub>3</sub> OD) spectrum of compound <b>8</b> ..... | 73 |
| Figure S77. NOESY (CD <sub>3</sub> OD) spectrum of compound <b>8</b> .....                               | 74 |
| Figure S78. IR spectrum of compound <b>8</b> . ....                                                      | 75 |
| Figure S79. UV spectrum of compound <b>8</b> .....                                                       | 75 |
| Figure S80. CD spectrum of compound <b>8</b> . ....                                                      | 76 |
| Figure S81. <sup>1</sup> H NMR (600 MHz, CD <sub>3</sub> OD) spectrum of compound <b>9</b> .....         | 77 |
| Figure S82. <sup>13</sup> C NMR (150 MHz, CD <sub>3</sub> OD) spectrum of compound <b>9</b> . ....       | 78 |
| Figure S83. <sup>1</sup> H NMR (600 MHz, CD <sub>3</sub> OD) spectrum of compound <b>10</b> .....        | 79 |
| Figure S84. <sup>13</sup> C NMR (150 MHz, CD <sub>3</sub> OD) spectrum of compound <b>10</b> . ....      | 80 |
| Figure S85. <sup>1</sup> H NMR (600 MHz, CD <sub>3</sub> OD) spectrum of compound <b>11</b> .....        | 81 |

|                                                                                                                  |     |
|------------------------------------------------------------------------------------------------------------------|-----|
| Figure S86. <sup>13</sup> C NMR (150 MHz, CD <sub>3</sub> OD) spectrum of compound <b>11</b> .                   | 82  |
| 2. X-ray Crystallographic Data of Compounds <b>1</b> , <b>5</b> and <b>8</b>                                     | 83  |
| Table S1. Crystal data and structure refinement for <b>1</b> .                                                   | 83  |
| Table S2. Crystal data and structure refinement for <b>5</b> .                                                   | 84  |
| Table S3. Crystal data and structure refinement for <b>8</b> .                                                   | 85  |
| 3. <i>In silico</i> prediction ECD spectrum.                                                                     | 86  |
| Table S4. Cartesian coordinates and equilibrium populations of low-energy conformers (>1%) of <b>1</b> in MeOH.  | 87  |
| Table S5. Cartesian coordinates and equilibrium populations of low-energy conformers (>1%) of <b>2</b> in MeOH.  | 91  |
| Table S6. Cartesian coordinates and equilibrium populations of low-energy conformers (>1%) of <b>3</b> in MeOH.  | 94  |
| Table S7. Cartesian coordinates and equilibrium populations of low-energy conformers (>1%) of <b>4</b> in MeOH.  | 96  |
| Table S8. Cartesian coordinates and equilibrium populations of low-energy conformers (>1%) of <b>5</b> in MeOH.  | 100 |
| Table S9. Cartesian coordinates and equilibrium populations of low-energy conformers (>1%) of <b>6</b> in MeOH.  | 106 |
| Table S10. Cartesian coordinates and equilibrium populations of low-energy conformers (>1%) of <b>7</b> in MeOH. | 111 |
| Table S11. Cartesian coordinates and equilibrium populations of low-energy conformers (>1%) of <b>8</b> in MeOH. | 114 |
| 4. Bioactivity Assay                                                                                             | 118 |
| Figure S87. The cytotoxicity of Pubescens B ( <b>2</b> ) and pubescens H ( <b>8</b> ).                           | 118 |

## 1. Spectroscopic Data.

Figure S1. HRESIMS (MeOH) spectrum of compound 1.

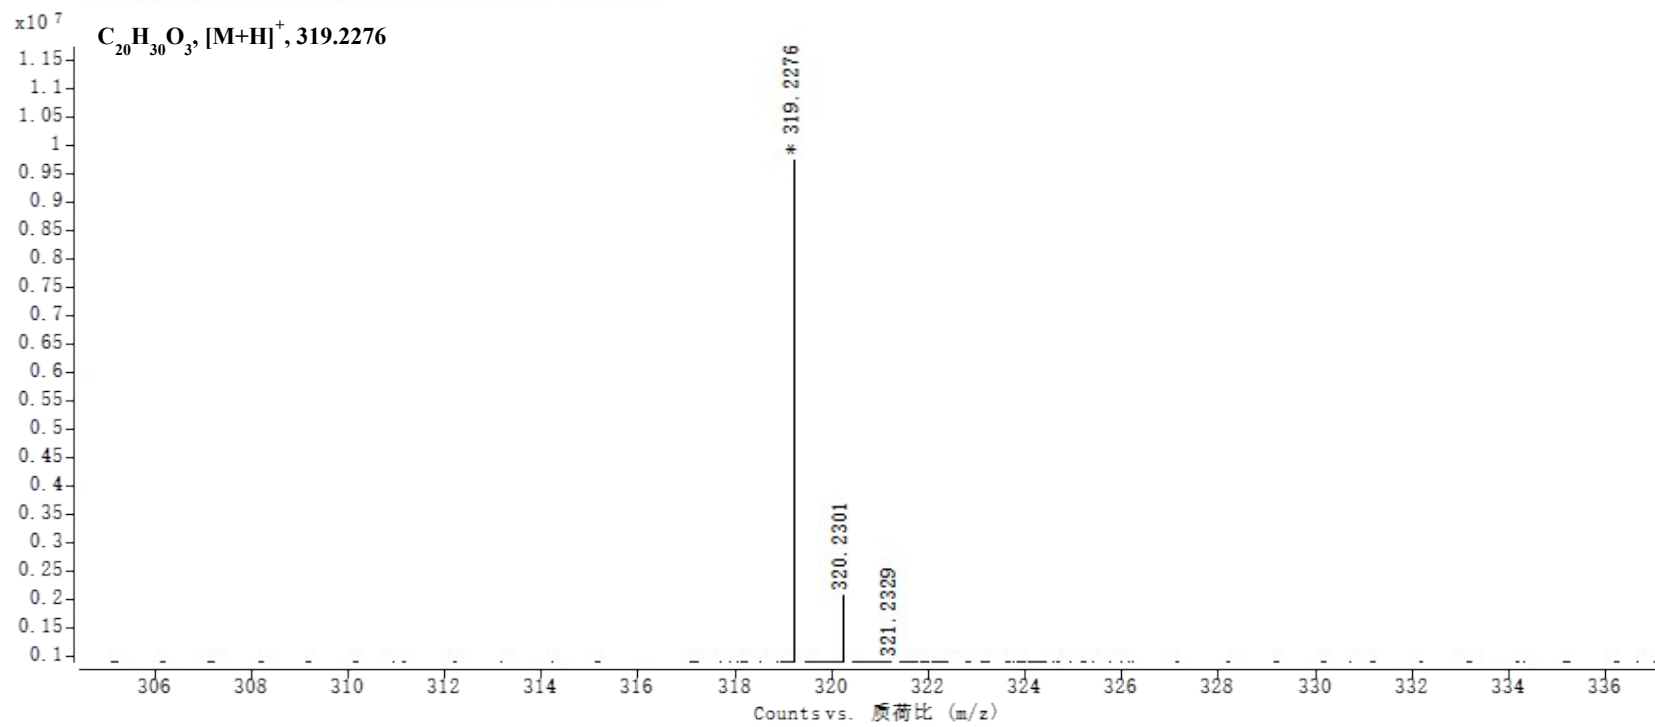

Figure S2. <sup>1</sup>H NMR (700 MHz, CD<sub>3</sub>OD) spectrum of compound 1.

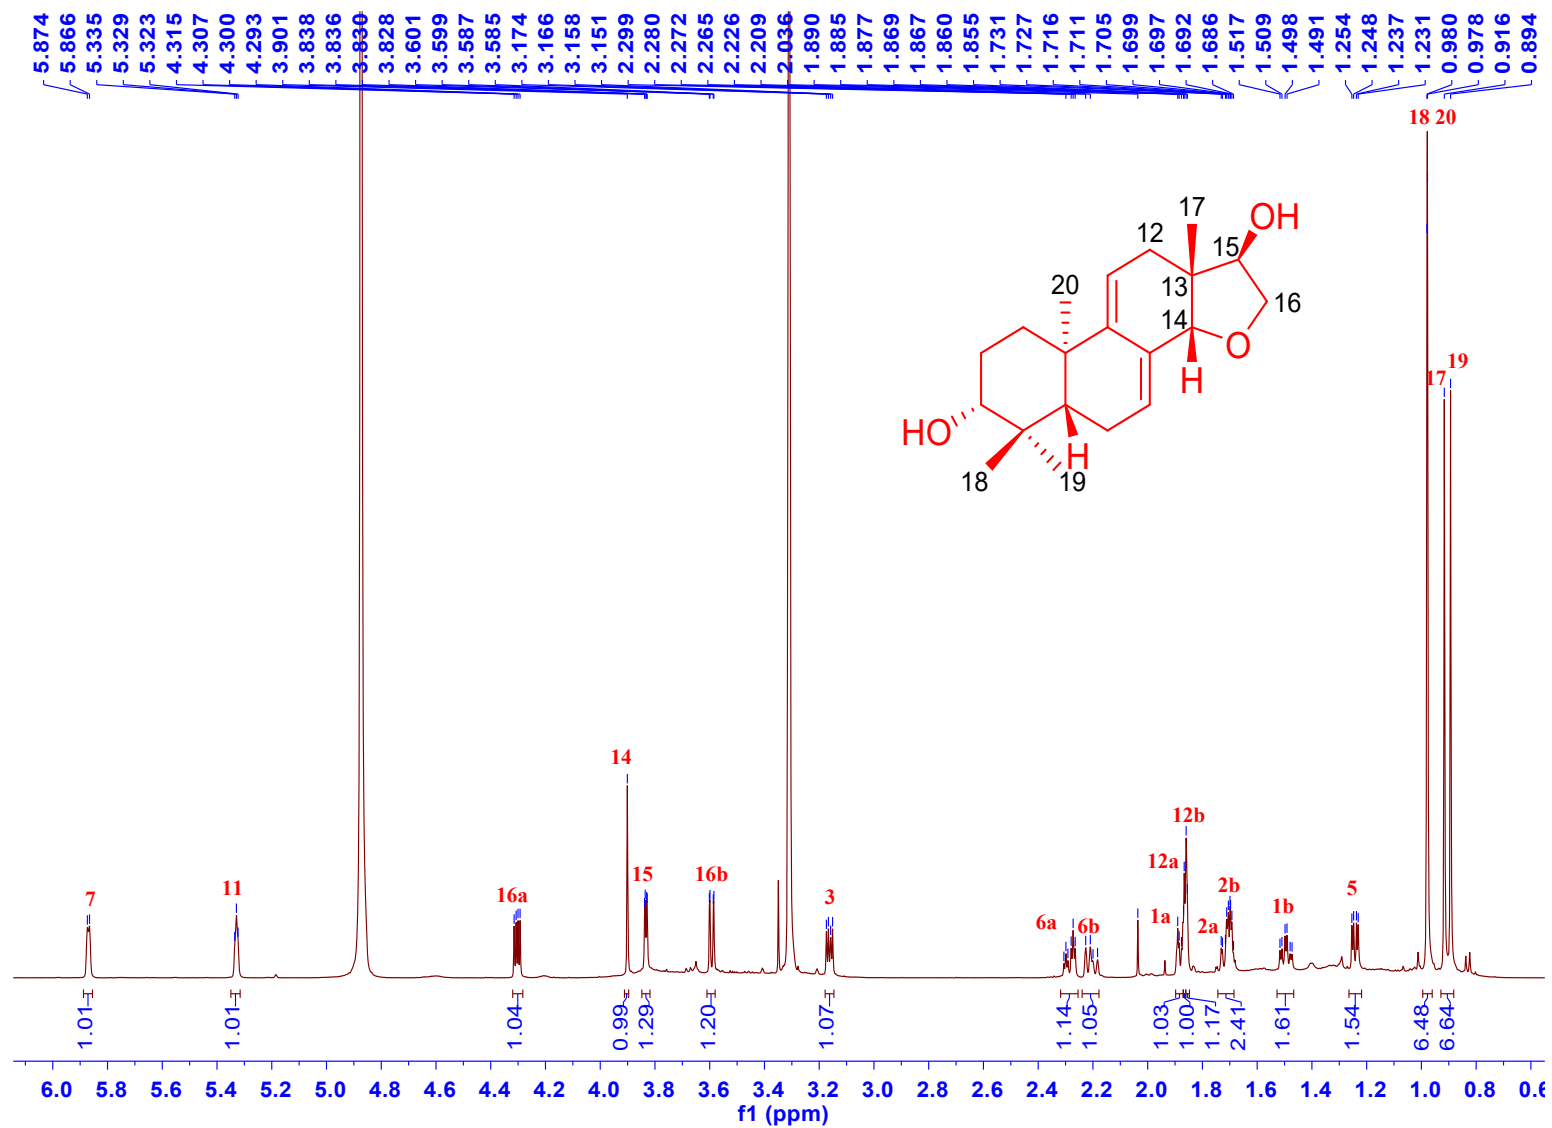

Figure S3.  $^{13}\text{C}$  NMR (150 MHz,  $\text{CD}_3\text{OD}$ ) spectrum of compound 1.

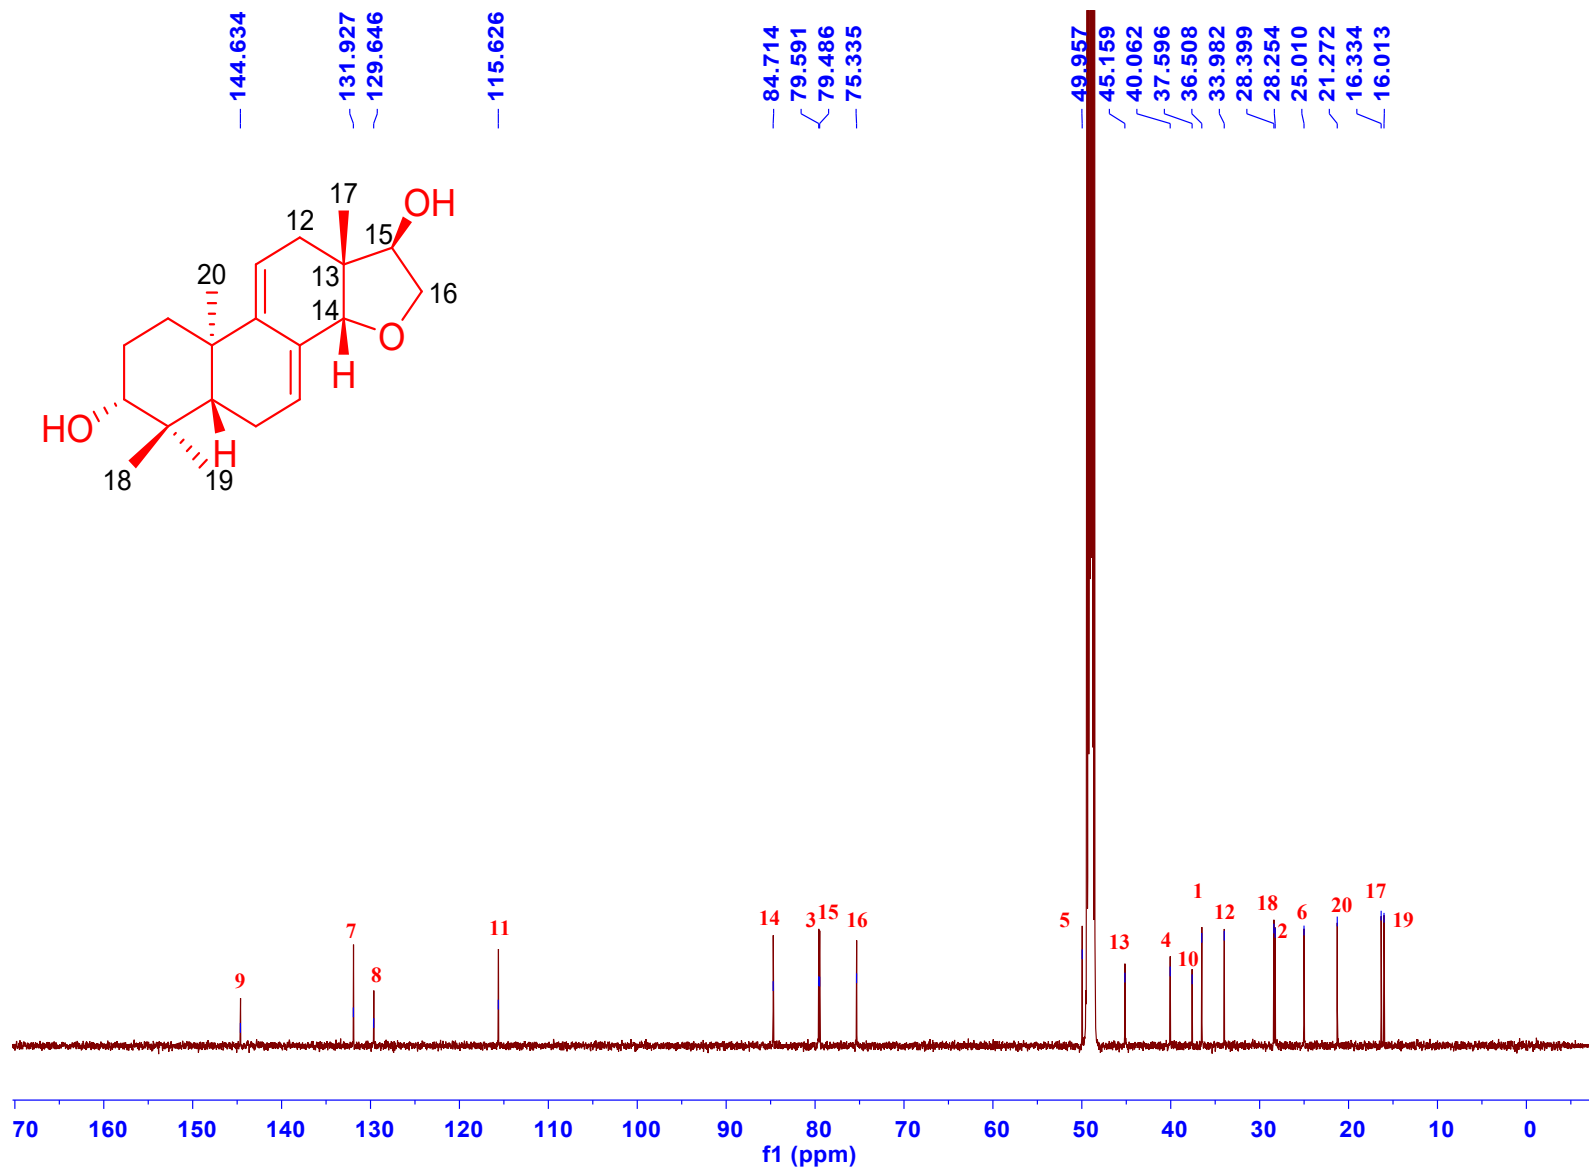

**Figure S4. HSQC (CD<sub>3</sub>OD) spectrum of compound 1.**

**Figure S5. HMBC (CD<sub>3</sub>OD) spectrum of compound 1.**

**Figure S6. <sup>1</sup>H-<sup>1</sup>H COSY (CD<sub>3</sub>OD) spectrum of compound 1.**

**Figure S7. NOESY (CD<sub>3</sub>OD) spectrum of compound 1.**

Figure S8. IR spectrum of compound 1.

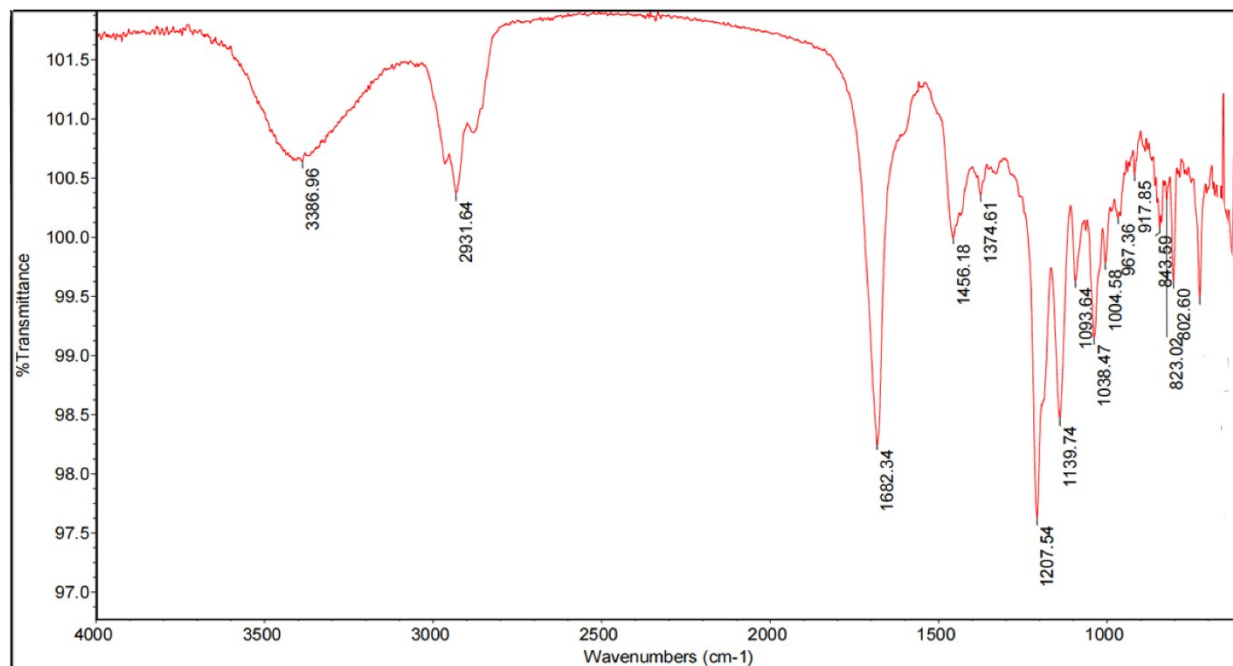

Figure S9. UV spectrum of compound 1.

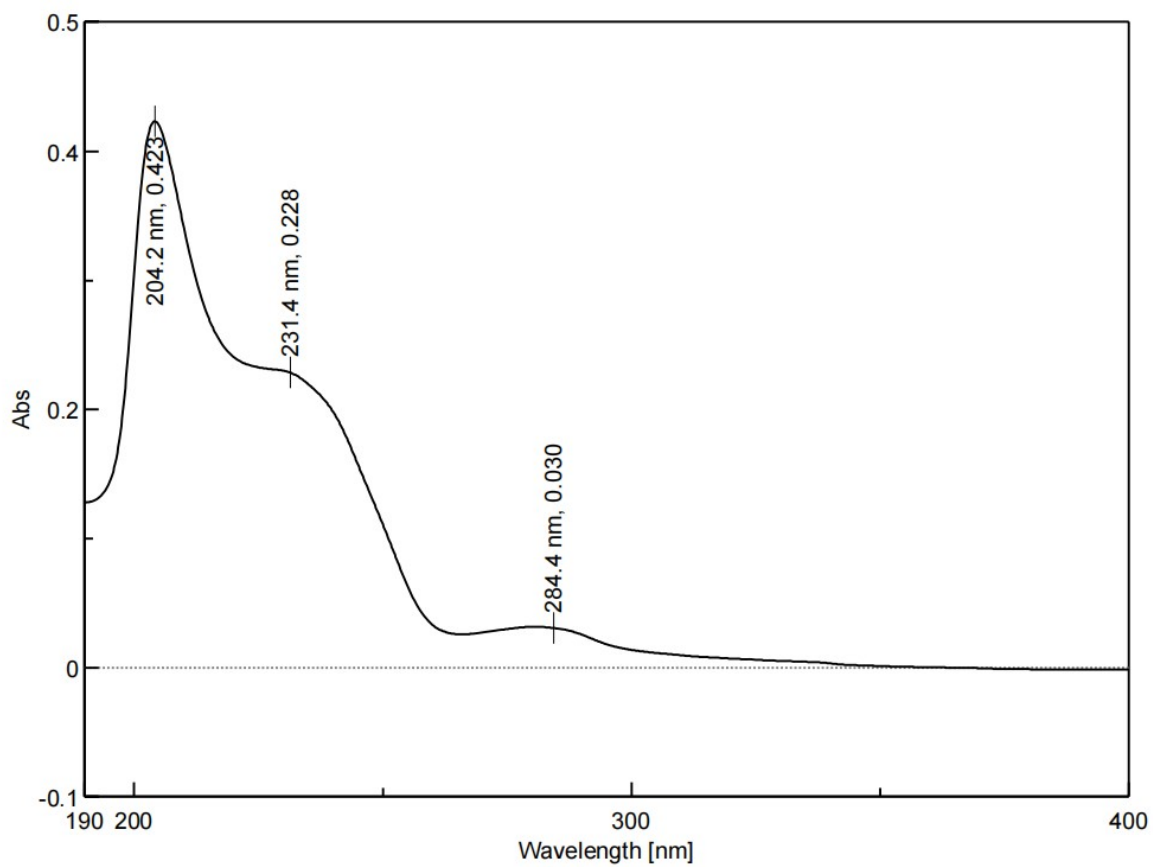

**Figure S10. CD spectrum of compound 1.**

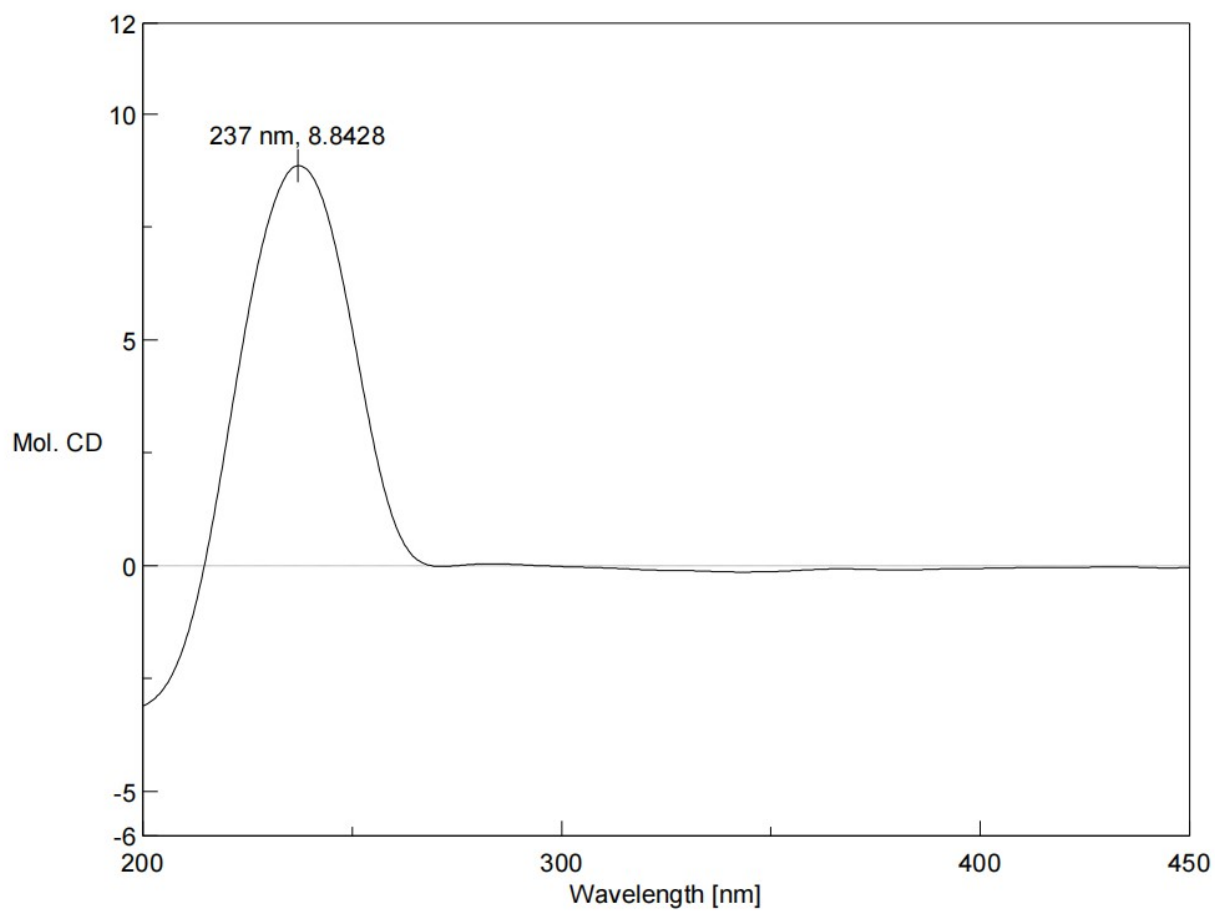

Figure S11. HRESIMS (MeOH) spectrum of compound 2.

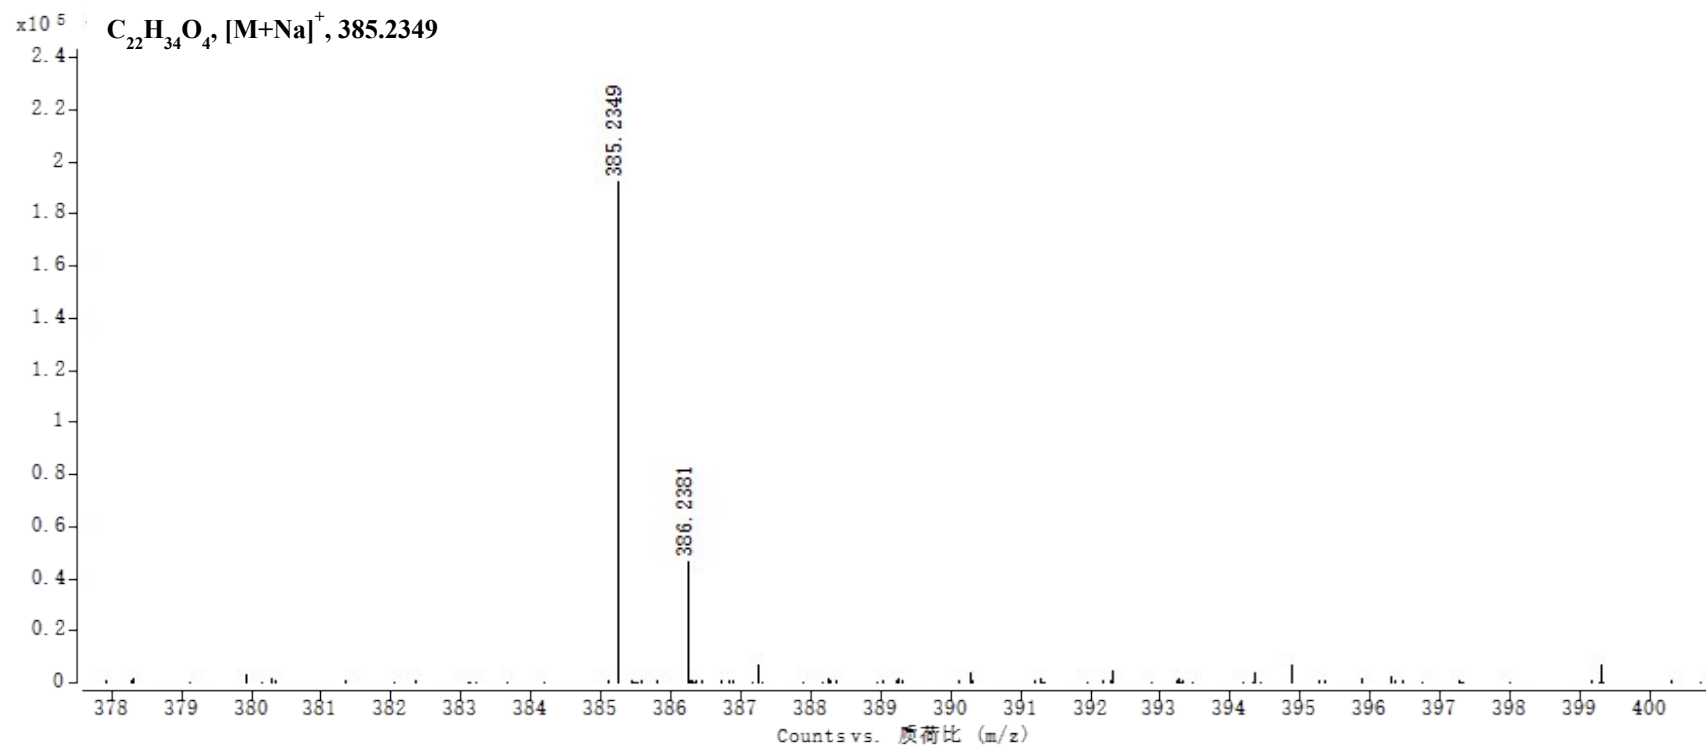

Figure S12. <sup>1</sup>H NMR (600 MHz, CD<sub>3</sub>OD) spectrum of compound 2.

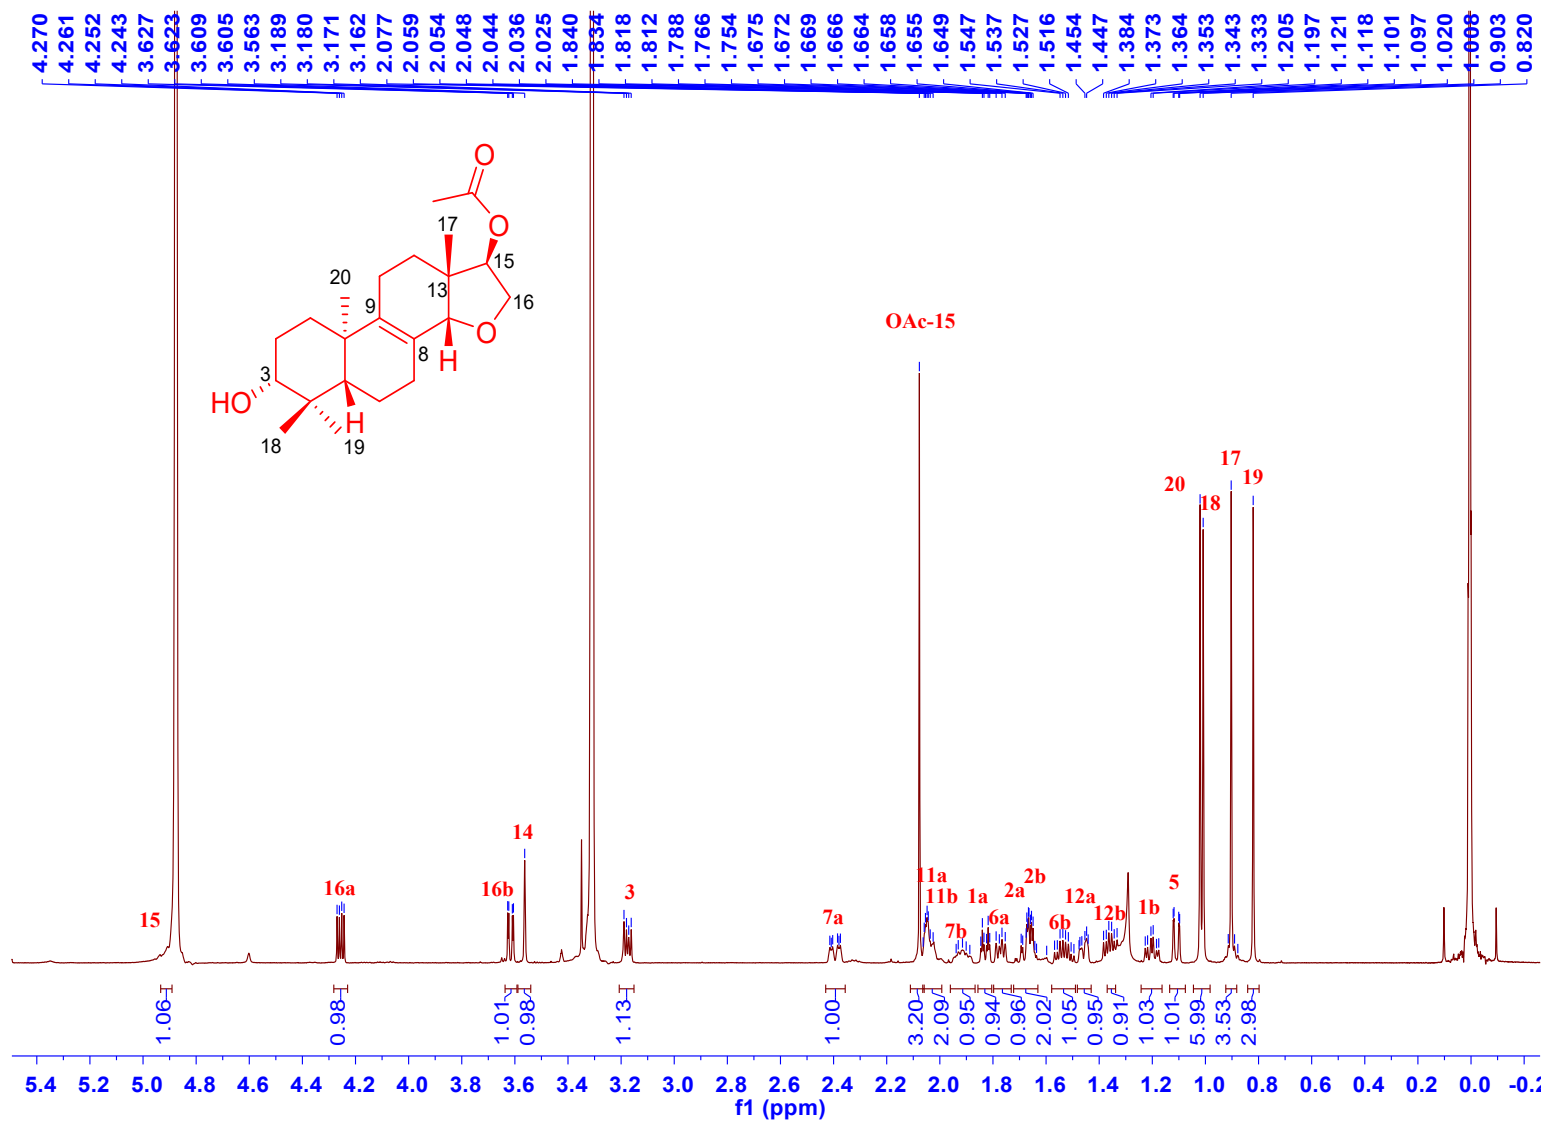

Figure S13.  $^{13}\text{C}$  NMR (150 MHz,  $\text{CD}_3\text{OD}$ ) spectrum of compound 2.

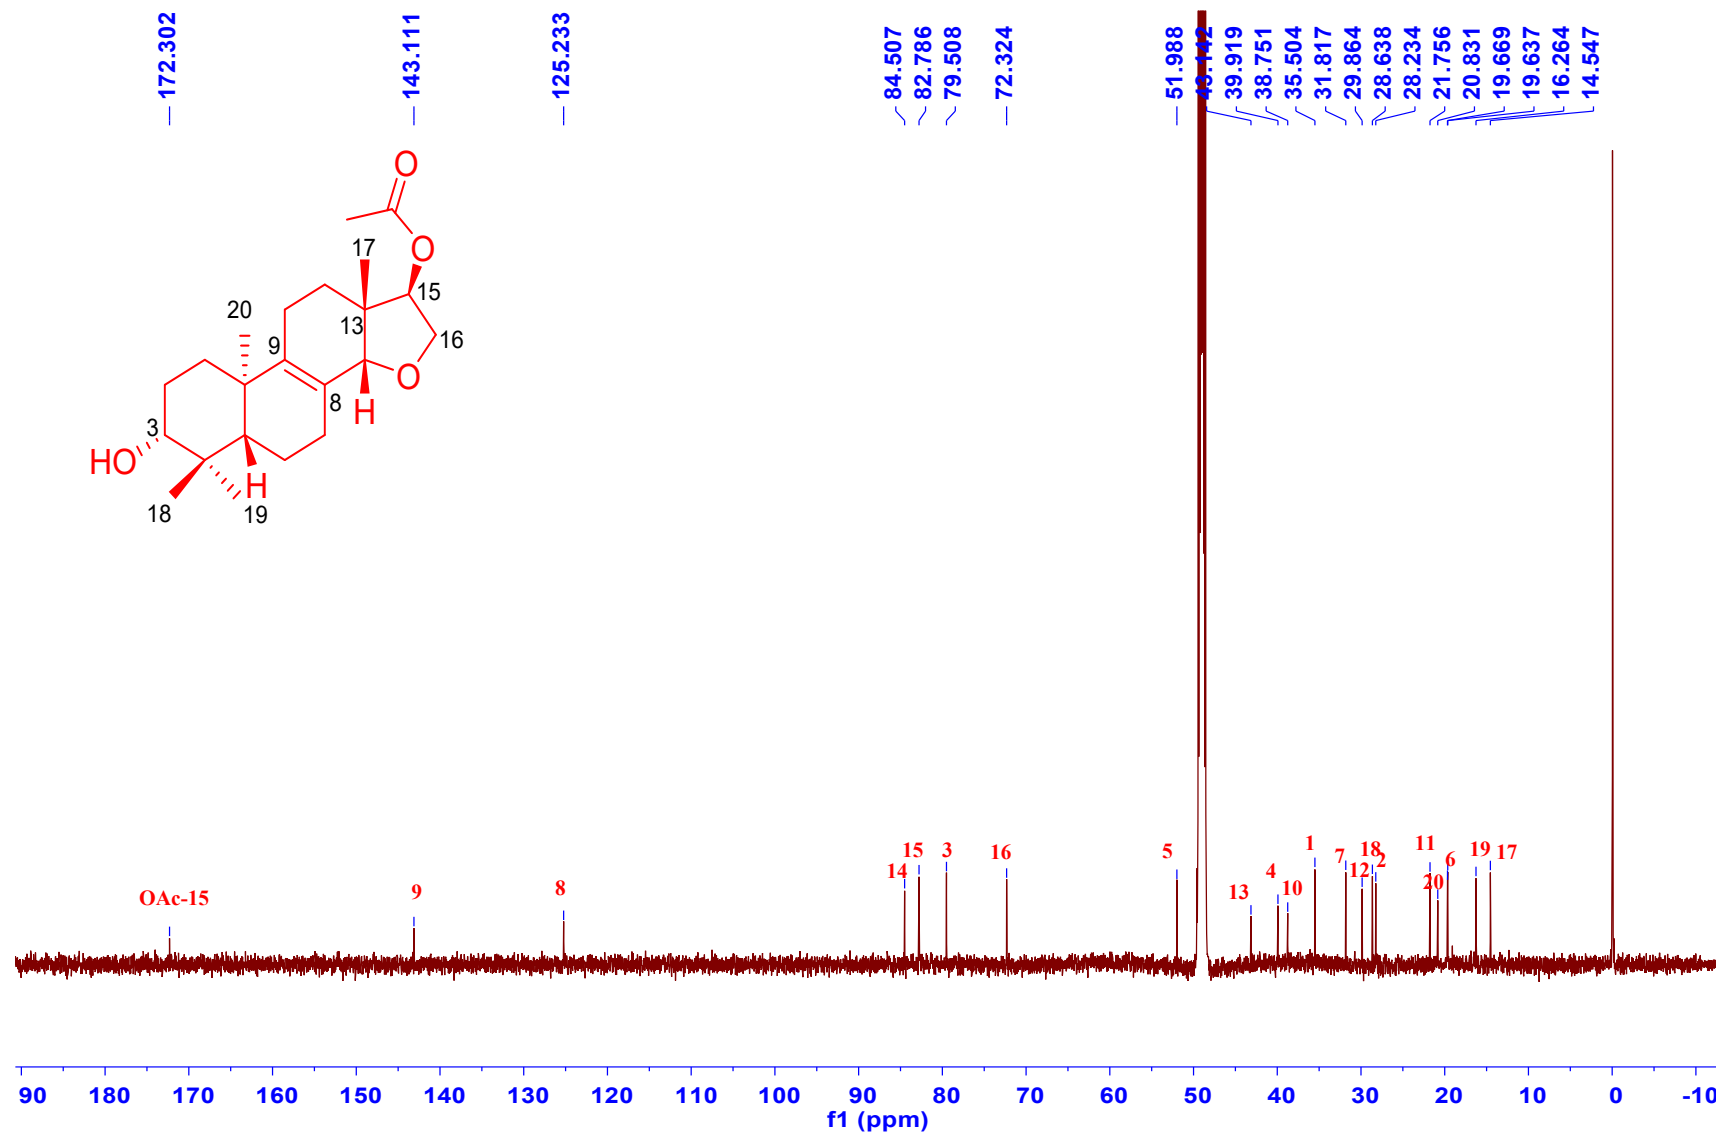

**Figure S14. HSQC (CD<sub>3</sub>OD) spectrum of compound 2.**

**Figure S15. HMBC (CD<sub>3</sub>OD) spectrum of compound 2.**

**Figure S16. <sup>1</sup>H-<sup>1</sup>H COSY (CD<sub>3</sub>OD) spectrum of compound 2.**

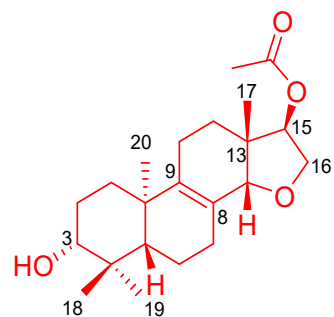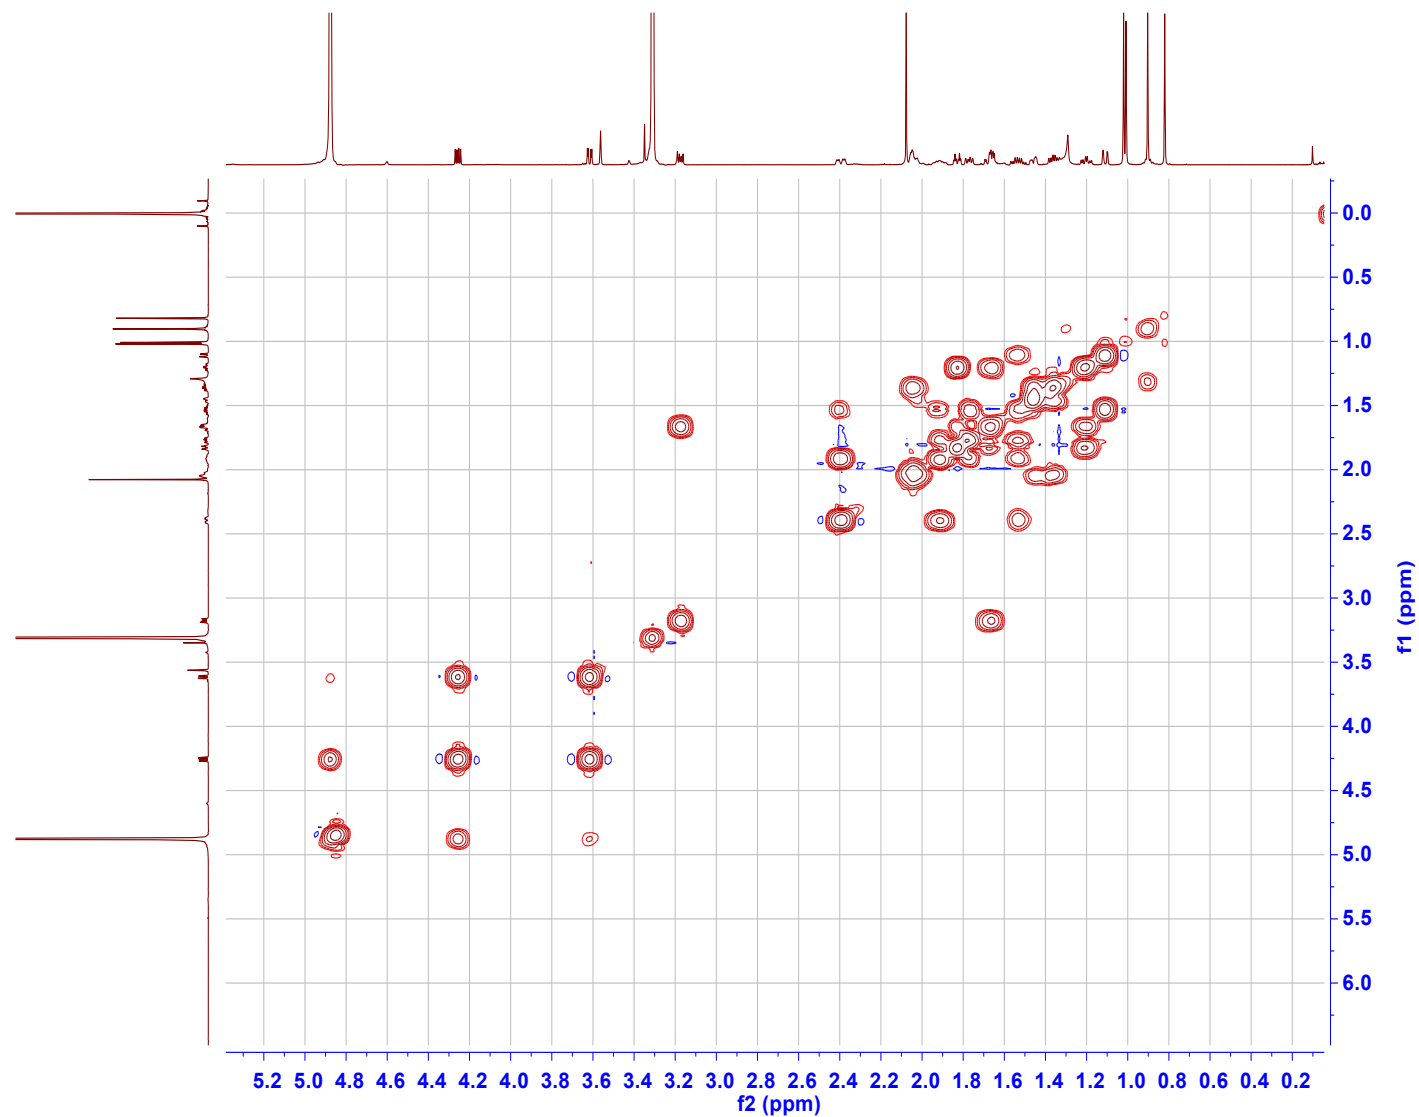

Figure S17. NOESY (CD<sub>3</sub>OD) spectrum of compound 2.

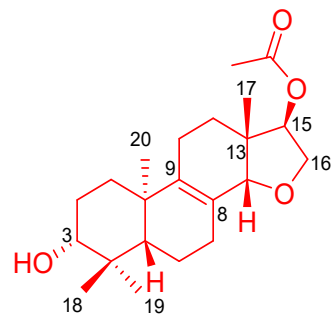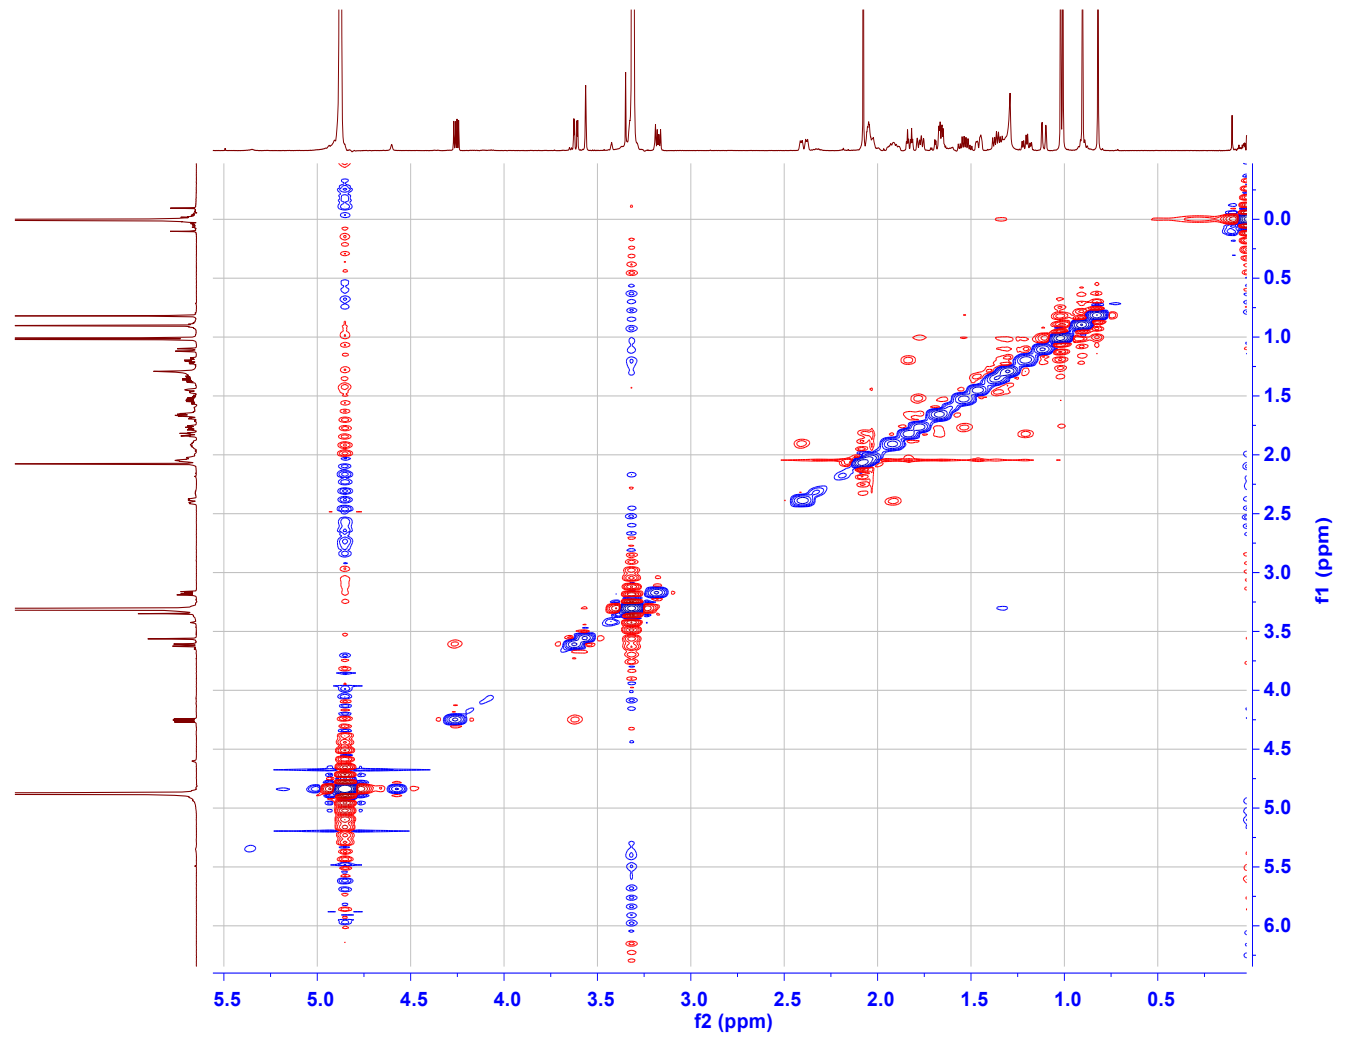

Figure S18. IR spectrum of compound 2.

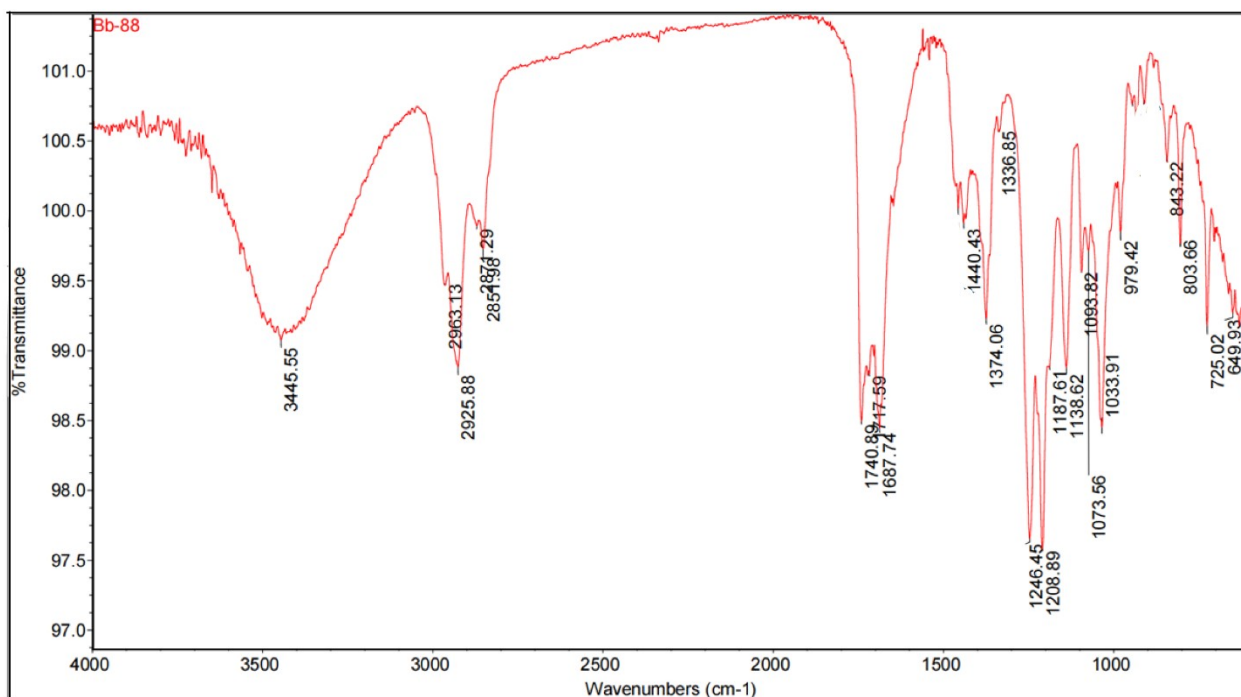

Figure S19. UV spectrum of compound 2.

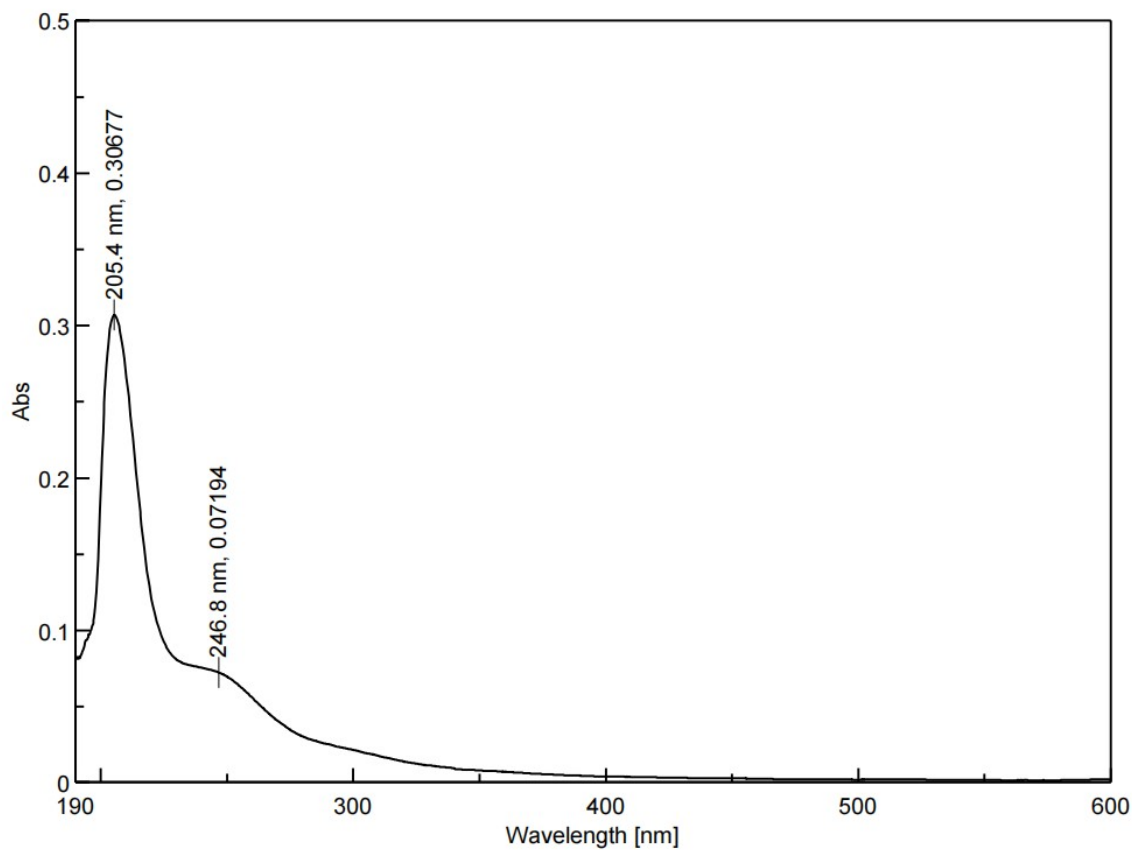

Figure S20. CD spectrum of compound 2.

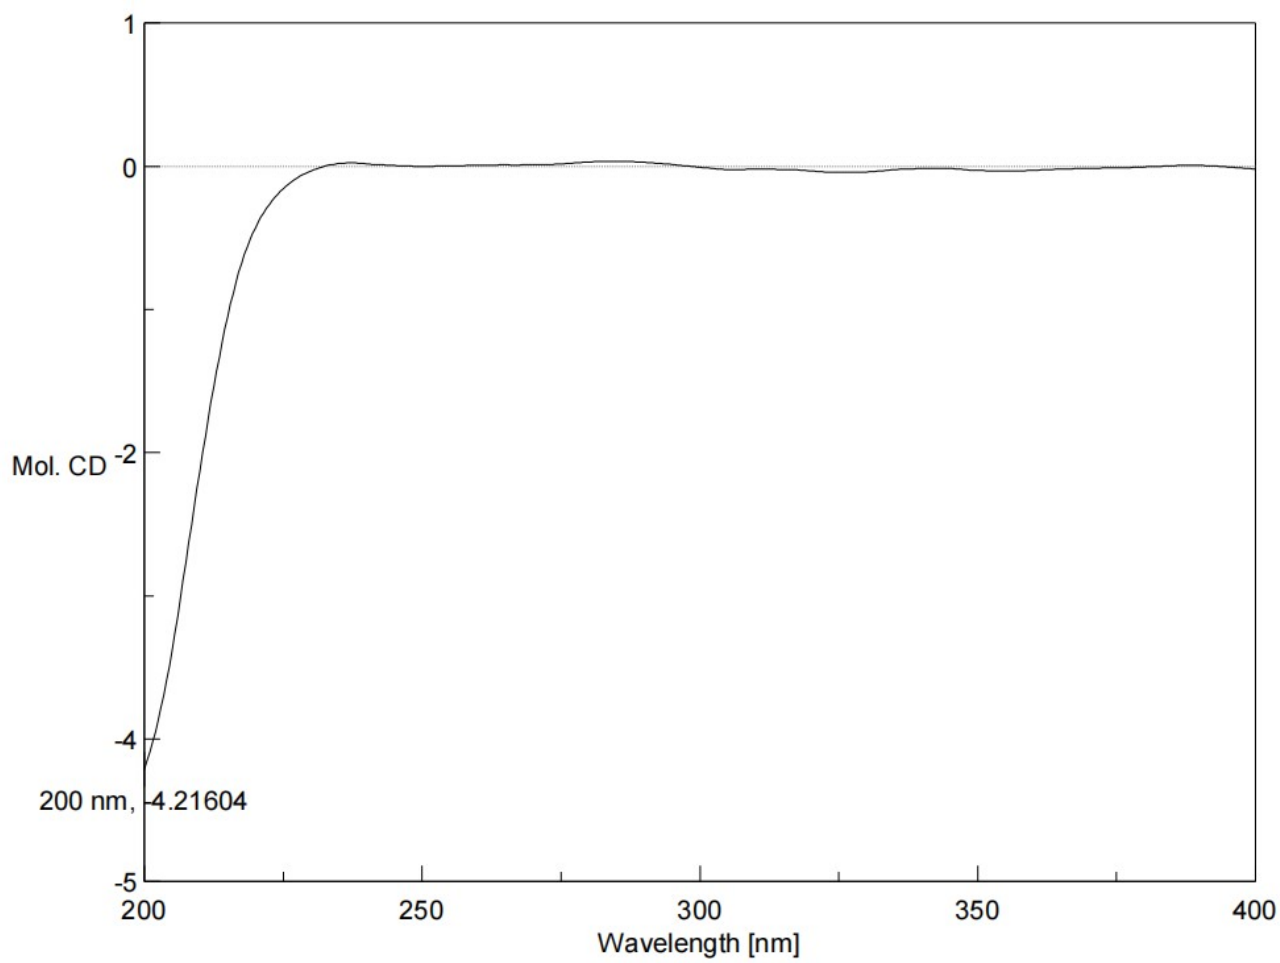

Figure S21. HRESIMS (MeOH) spectrum of compound 3.

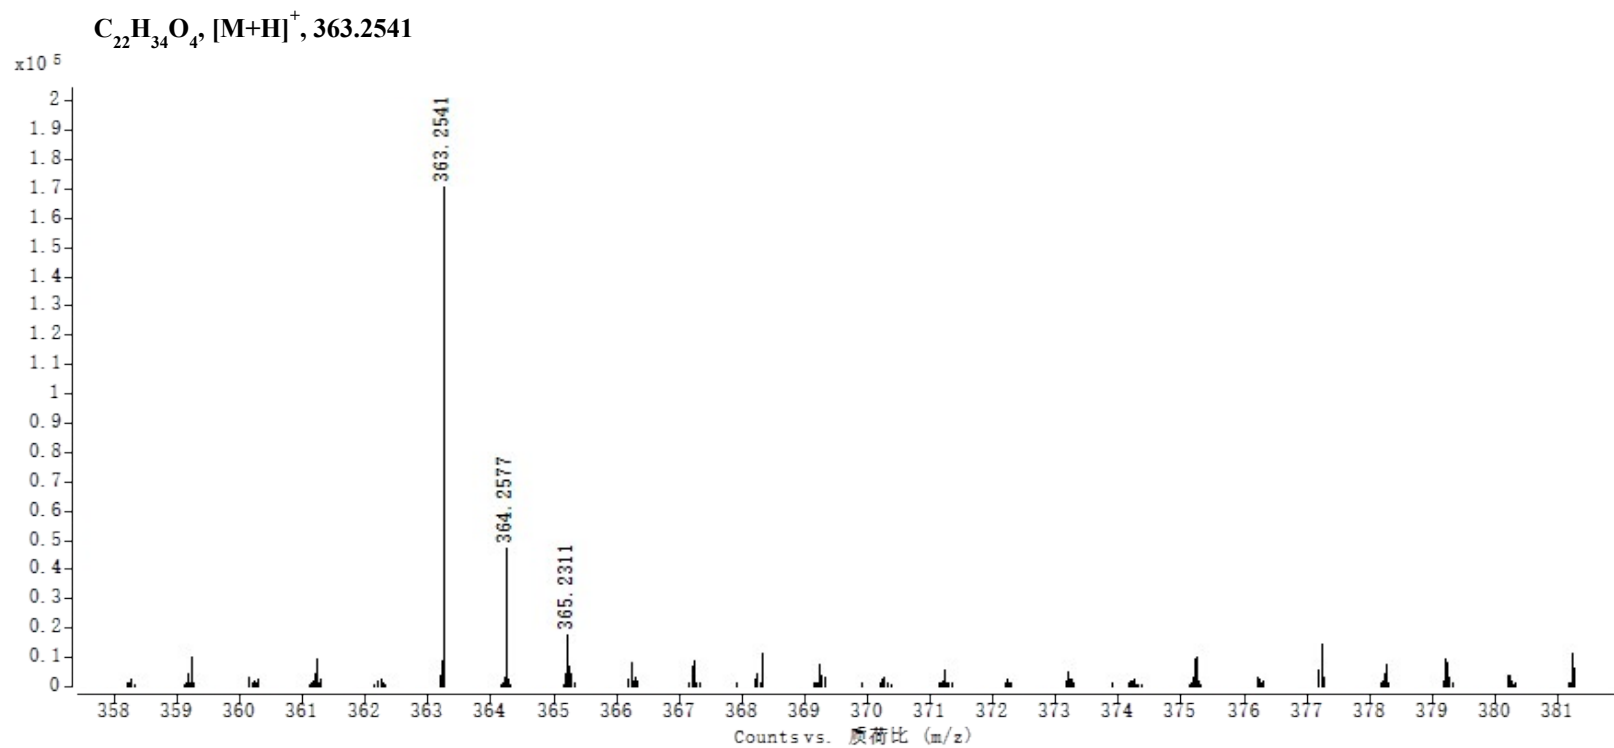

Figure S22. <sup>1</sup>H NMR (600 MHz, CD<sub>3</sub>OD) spectrum of compound 3.

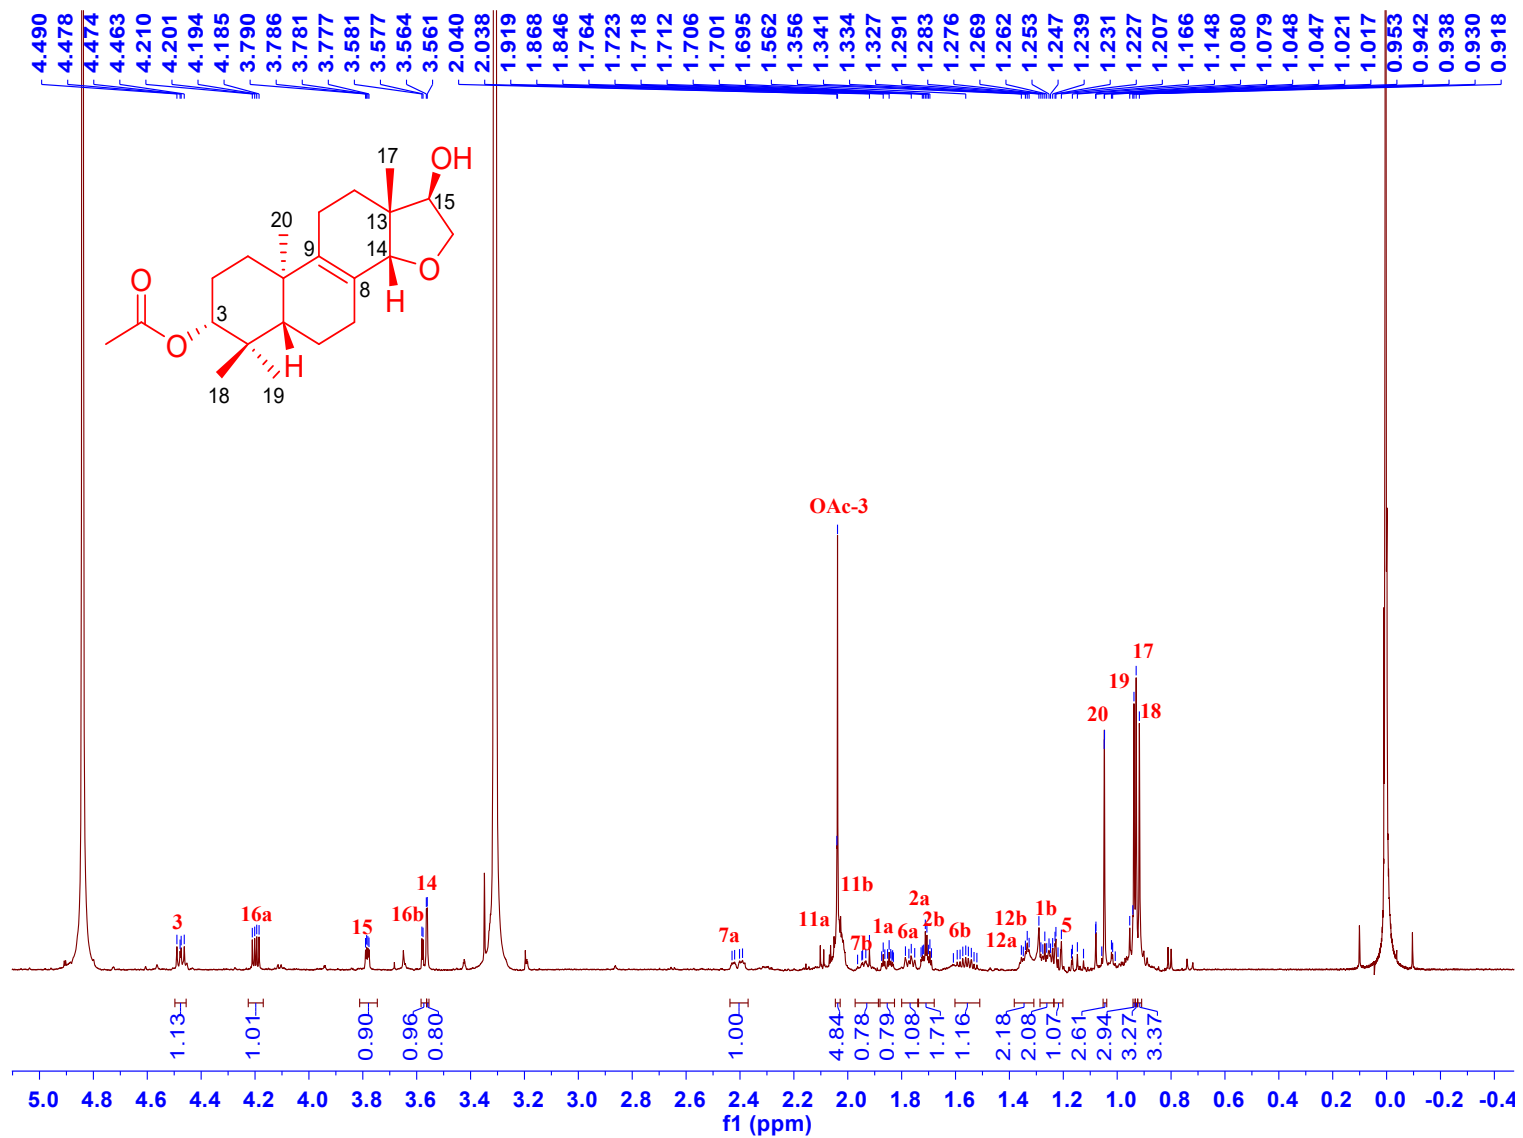

Figure S23.  $^{13}\text{C}$  NMR (150 MHz,  $\text{CD}_3\text{OD}$ ) spectrum of compound 3.

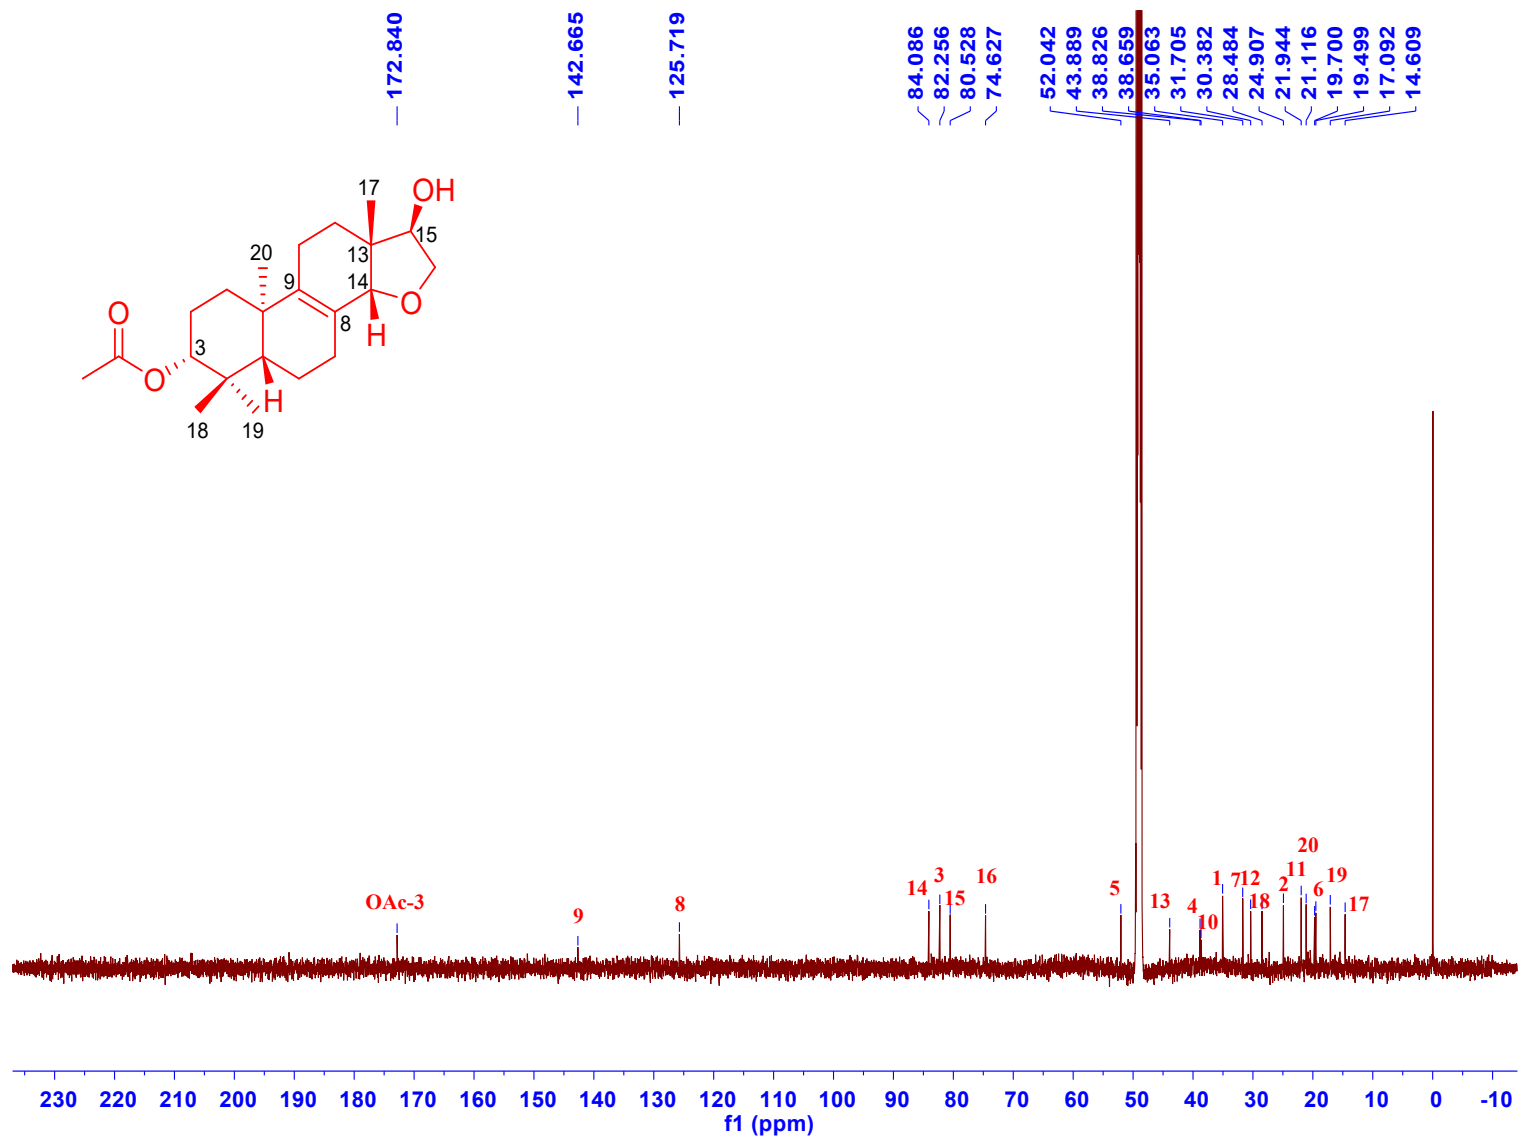

**Figure S24. HSQC (CD<sub>3</sub>OD) spectrum of compound 3.**

**Figure S25. HMBC (CD<sub>3</sub>OD) spectrum of compound 3.**

**Figure S26. <sup>1</sup>H-<sup>1</sup>H COSY (CD<sub>3</sub>OD) spectrum of compound 3.**

**Figure S27. NOESY (CD<sub>3</sub>OD) spectrum of compound 3.**

Figure S28. IR spectrum of compound 3.

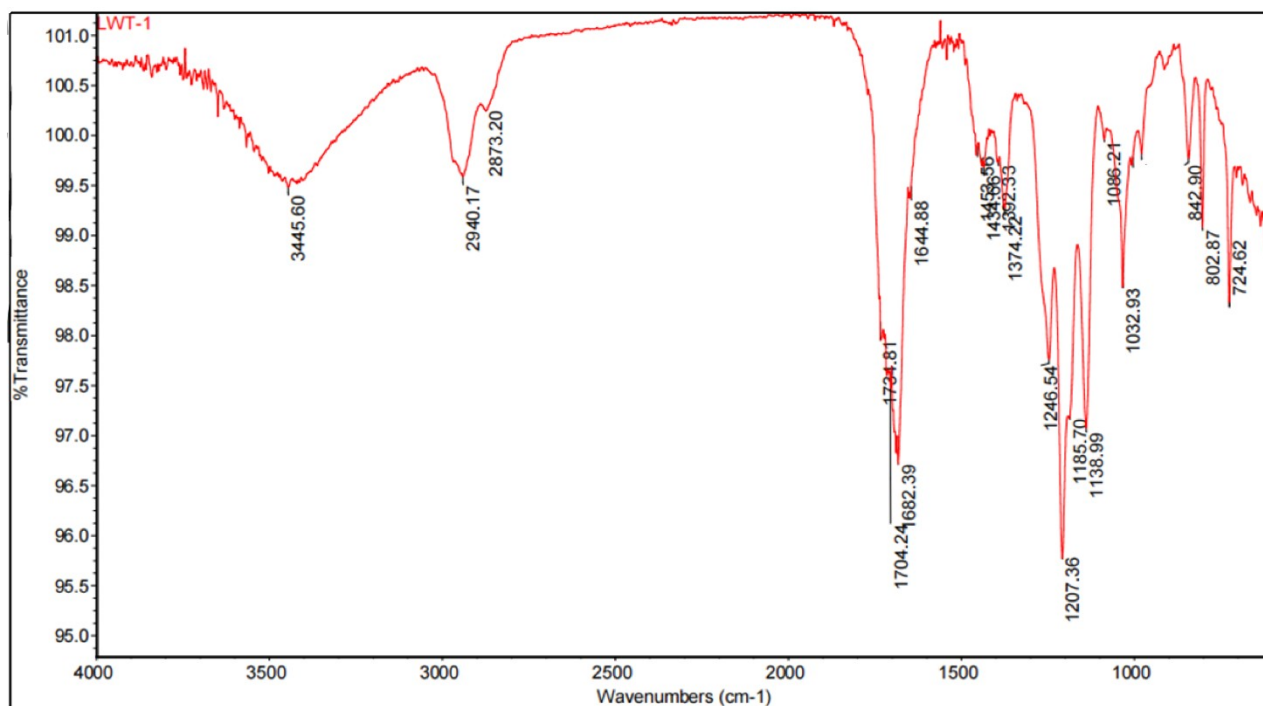

Figure S29. UV spectrum of compound 3.

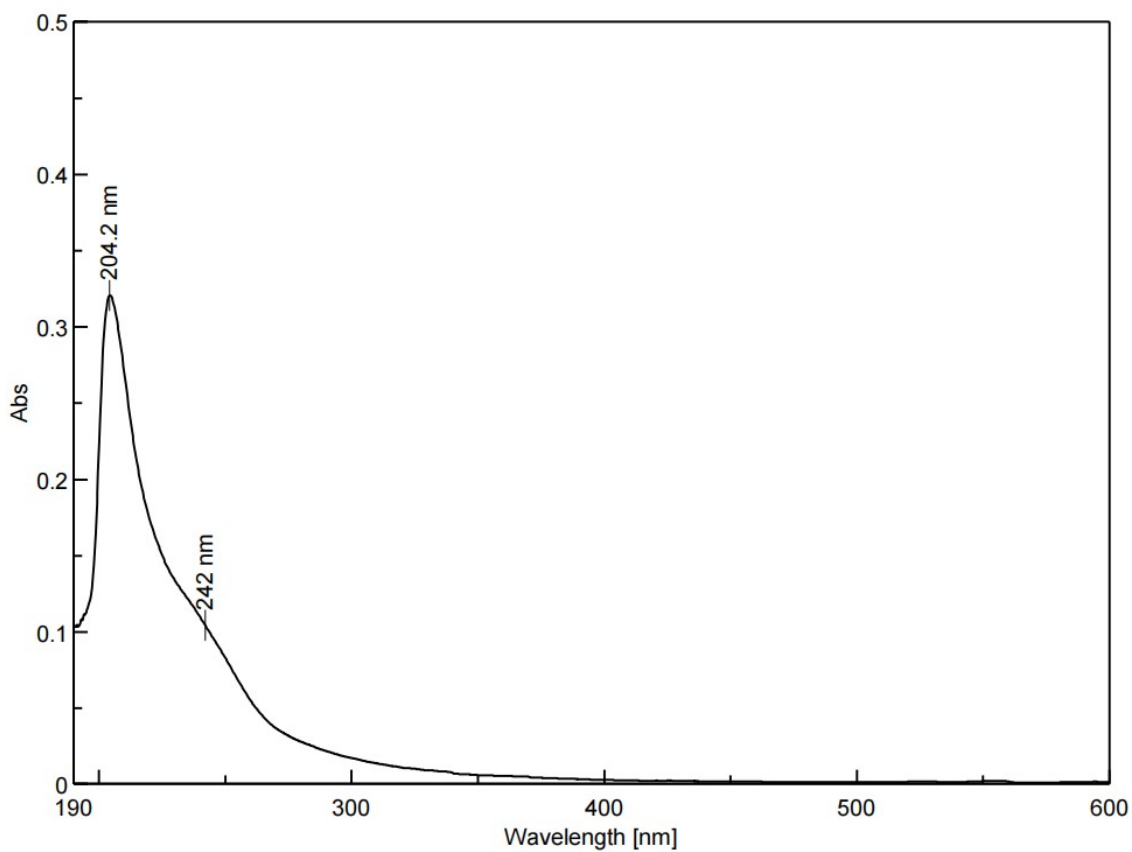

Figure S30. CD spectrum of compound 3.

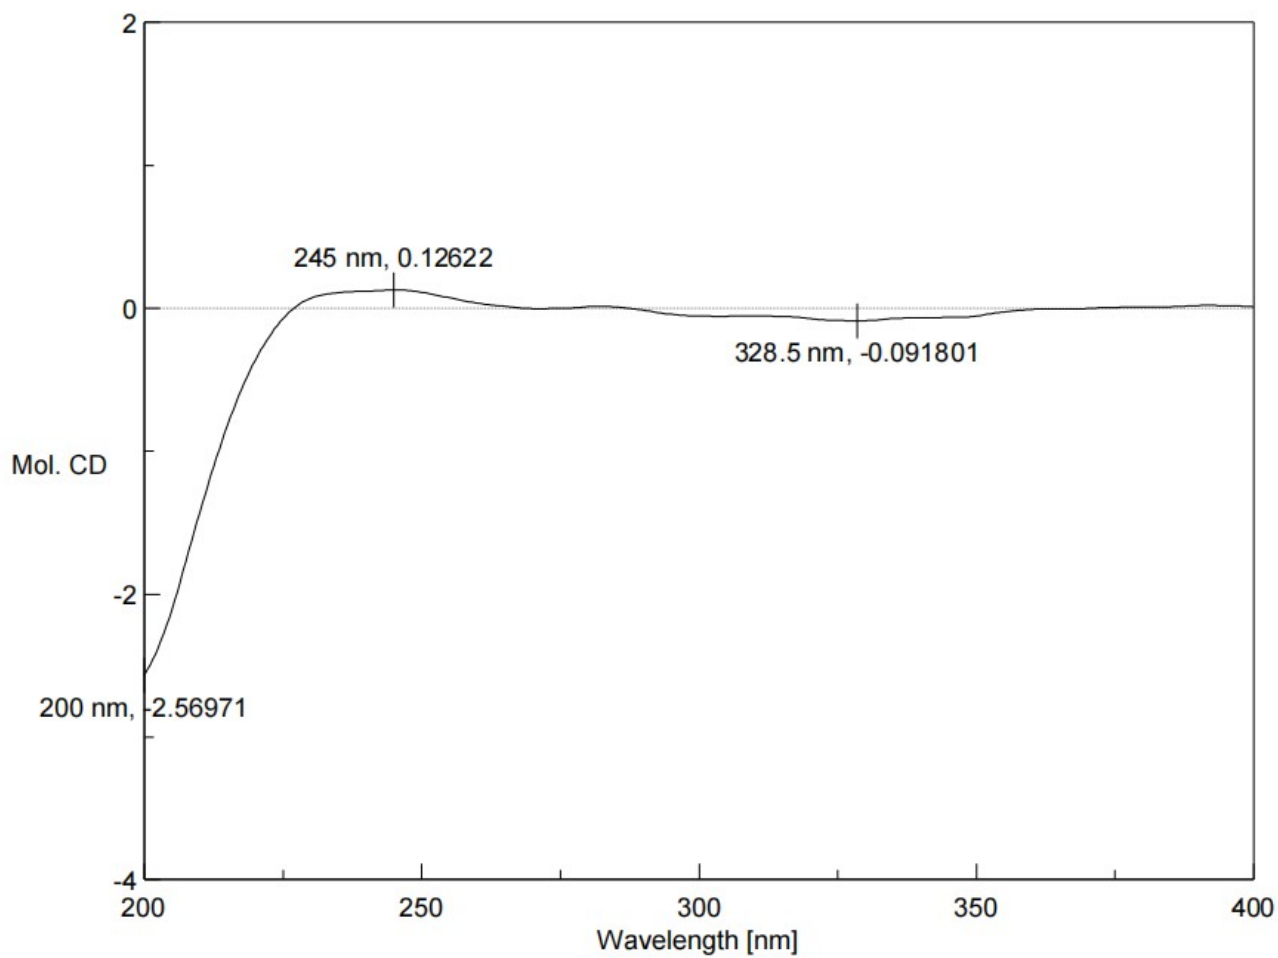

Figure S31. HRESIMS (MeOH) spectrum of compound 4.

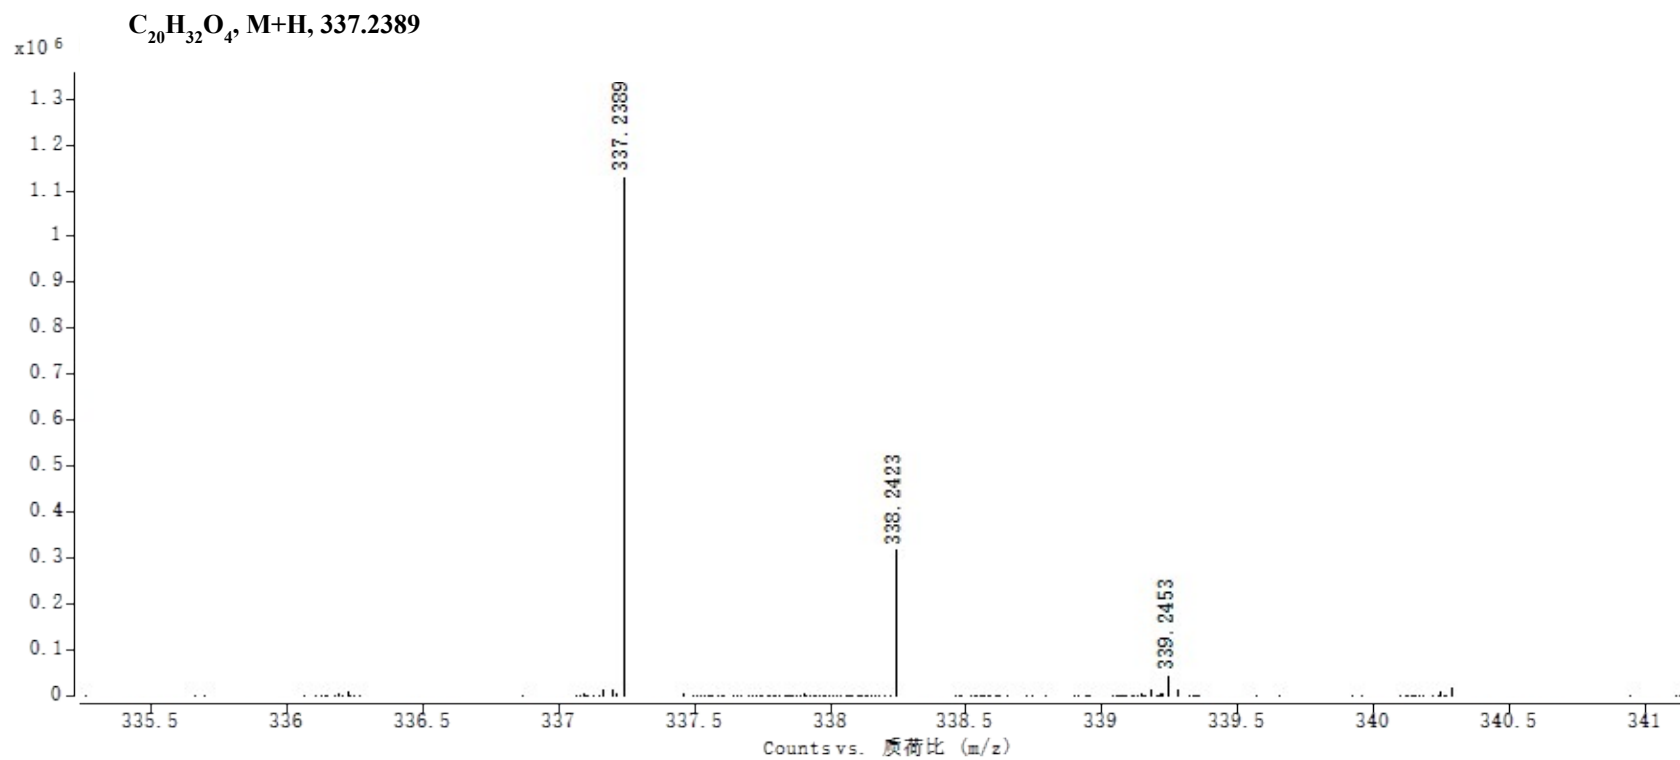

Figure S32. <sup>1</sup>H NMR (700 MHz, CD<sub>3</sub>OD) spectrum of compound 4.

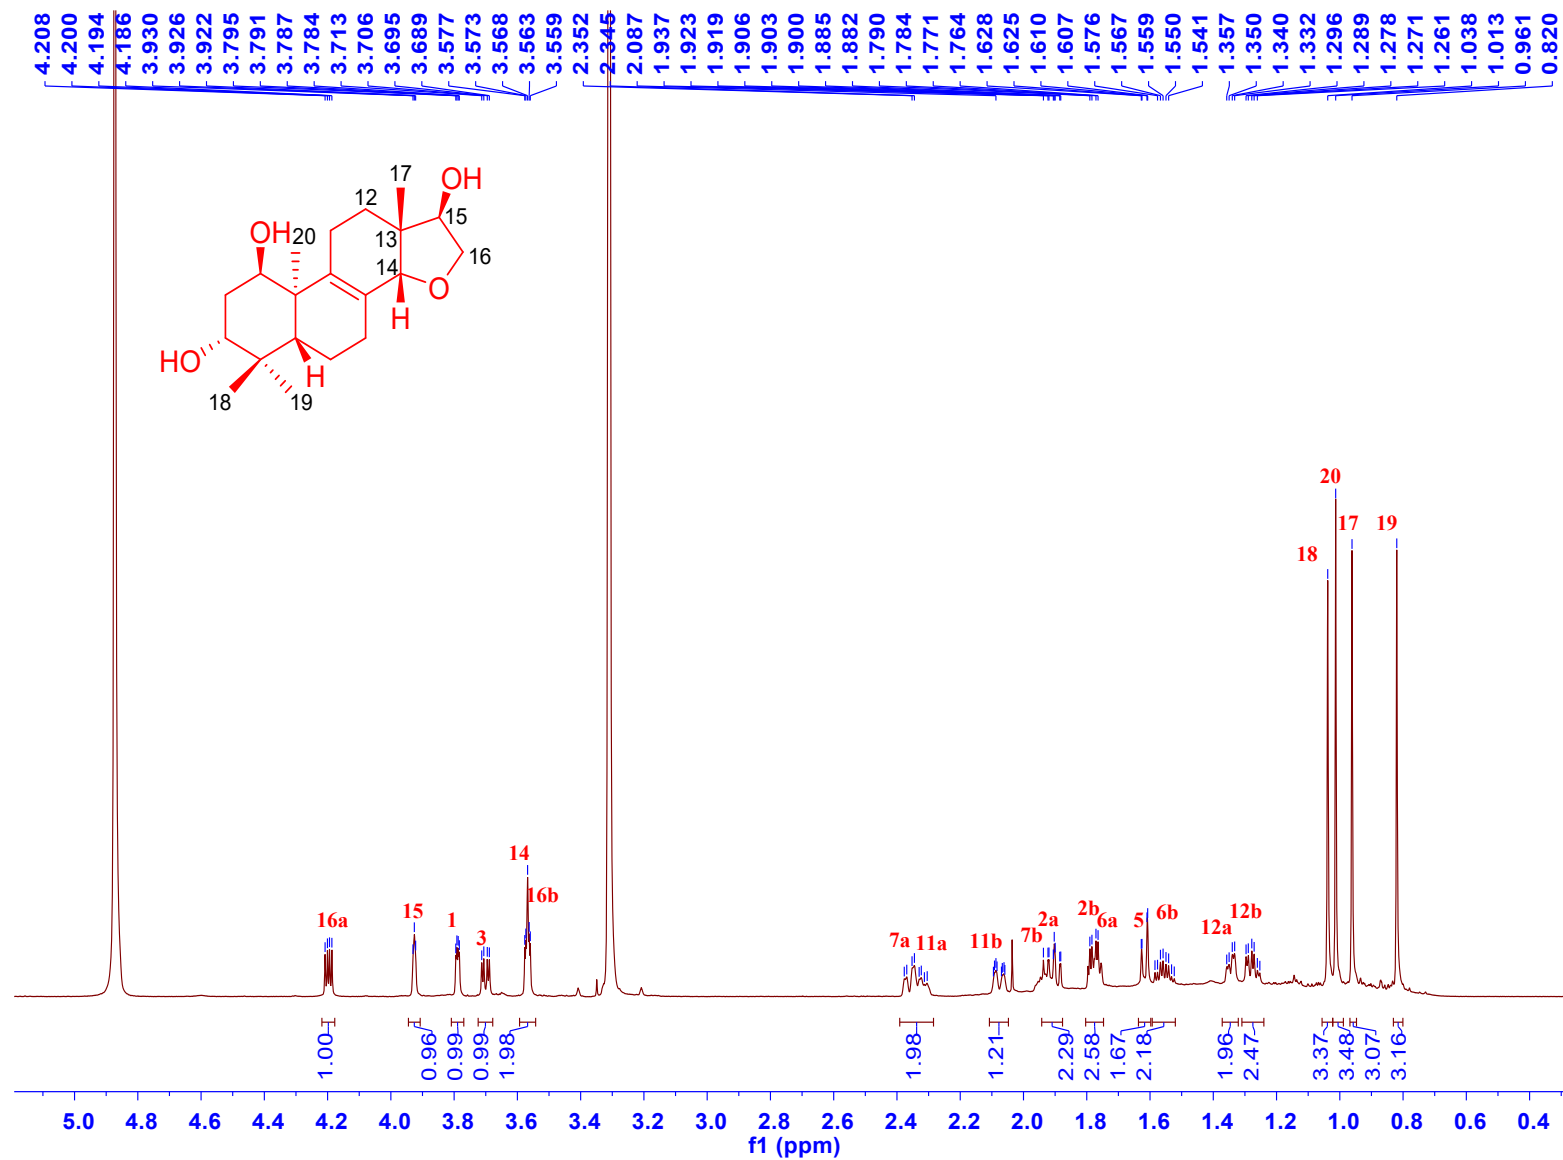

Figure S33.  $^{13}\text{C}$  NMR (150 MHz,  $\text{CD}_3\text{OD}$ ) spectrum of compound 4.

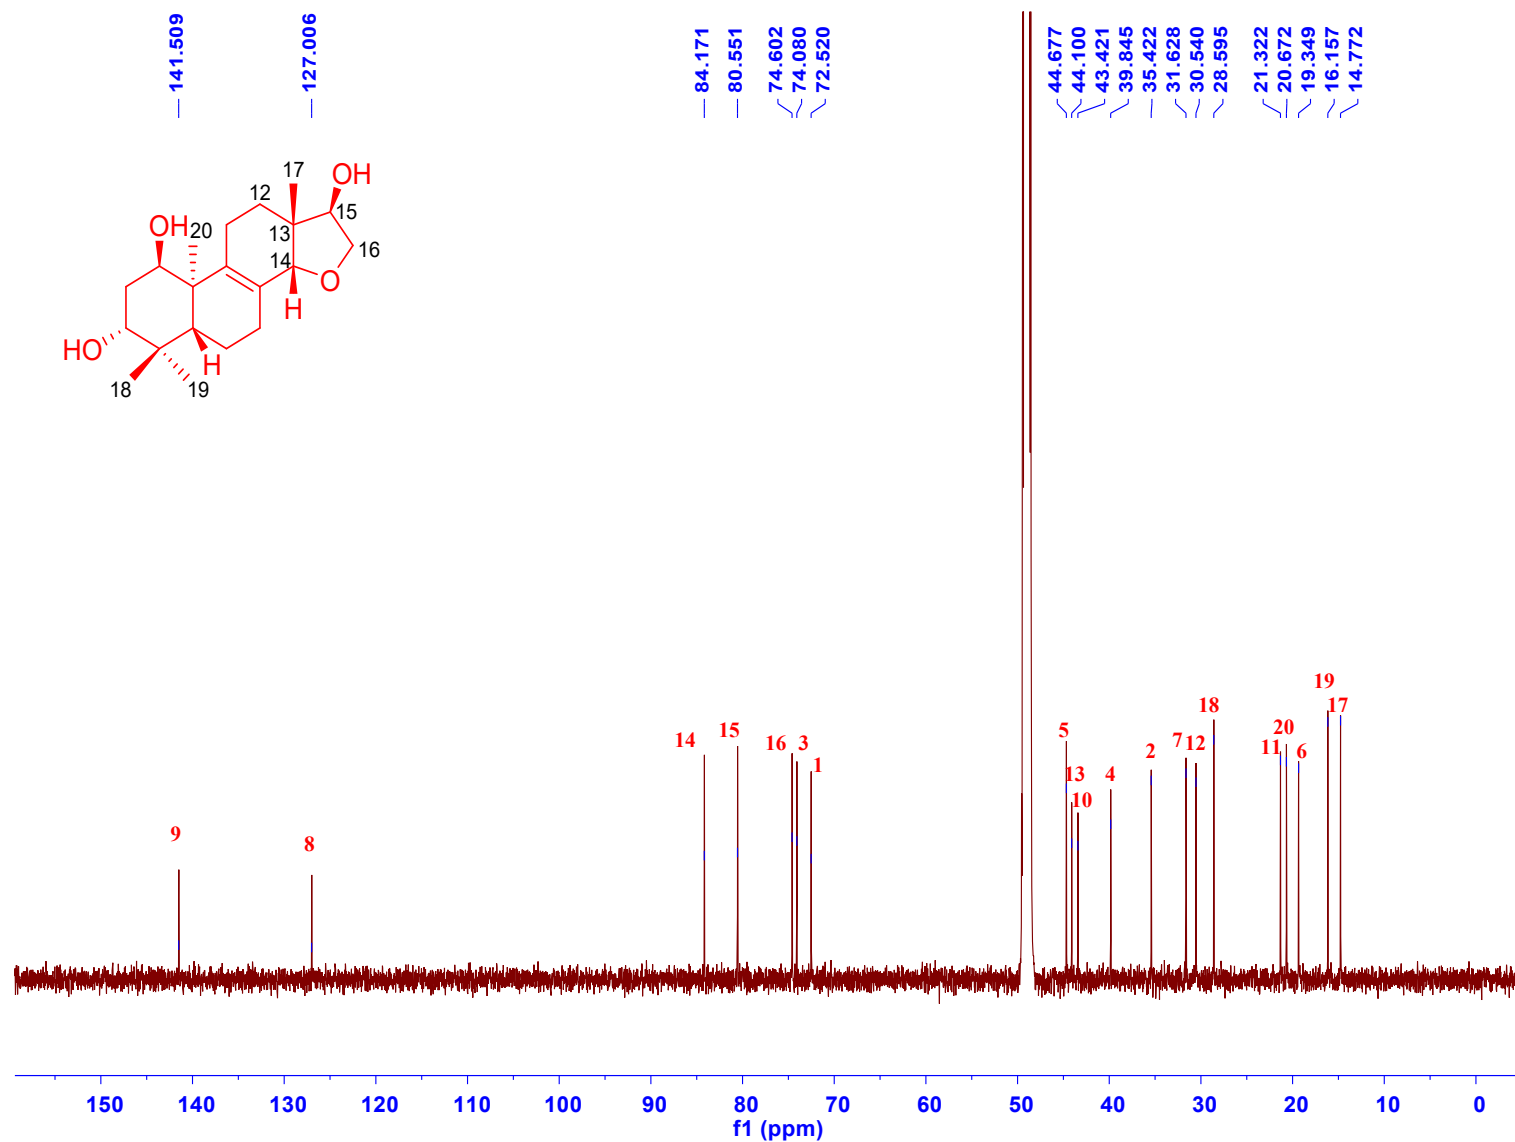

**Figure S34. HSQC (CD<sub>3</sub>OD) spectrum of compound 4.**

**Figure S35. HMBC (CD<sub>3</sub>OD) spectrum of compound 4.**

**Figure S36. <sup>1</sup>H-<sup>1</sup>H COSY (CD<sub>3</sub>OD) spectrum of compound 4.**

**Figure S37. NOESY (CD<sub>3</sub>OD) spectrum of compound 4.**

Figure S38. IR spectrum of compound 4.

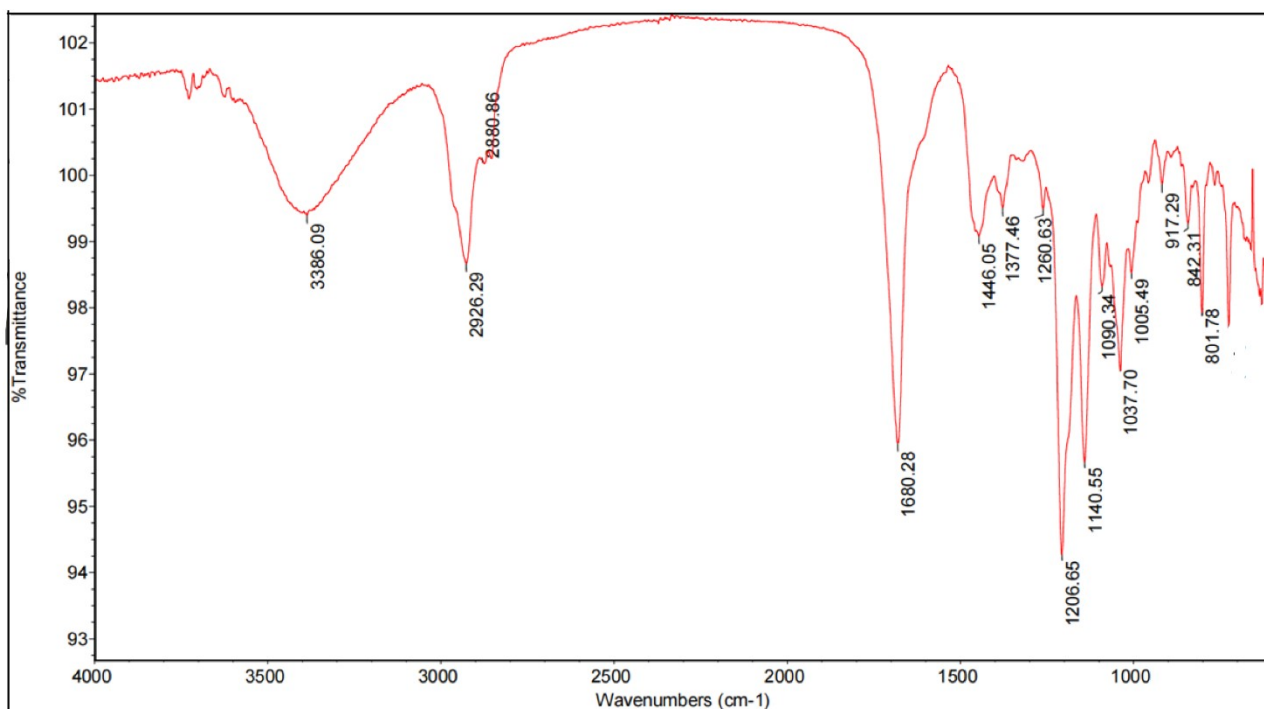

Figure S39. UV spectrum of compound 4.

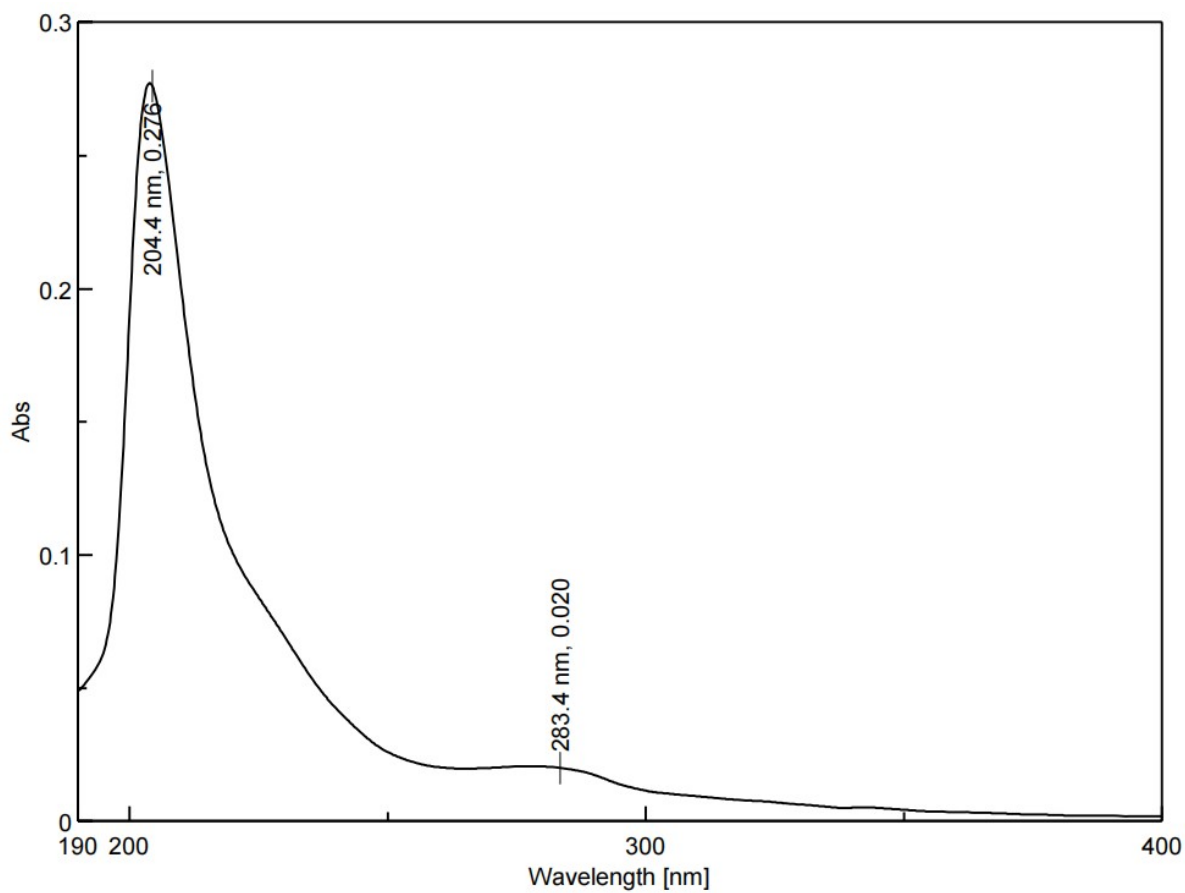

**Figure S40. CD spectrum of compound 4.**

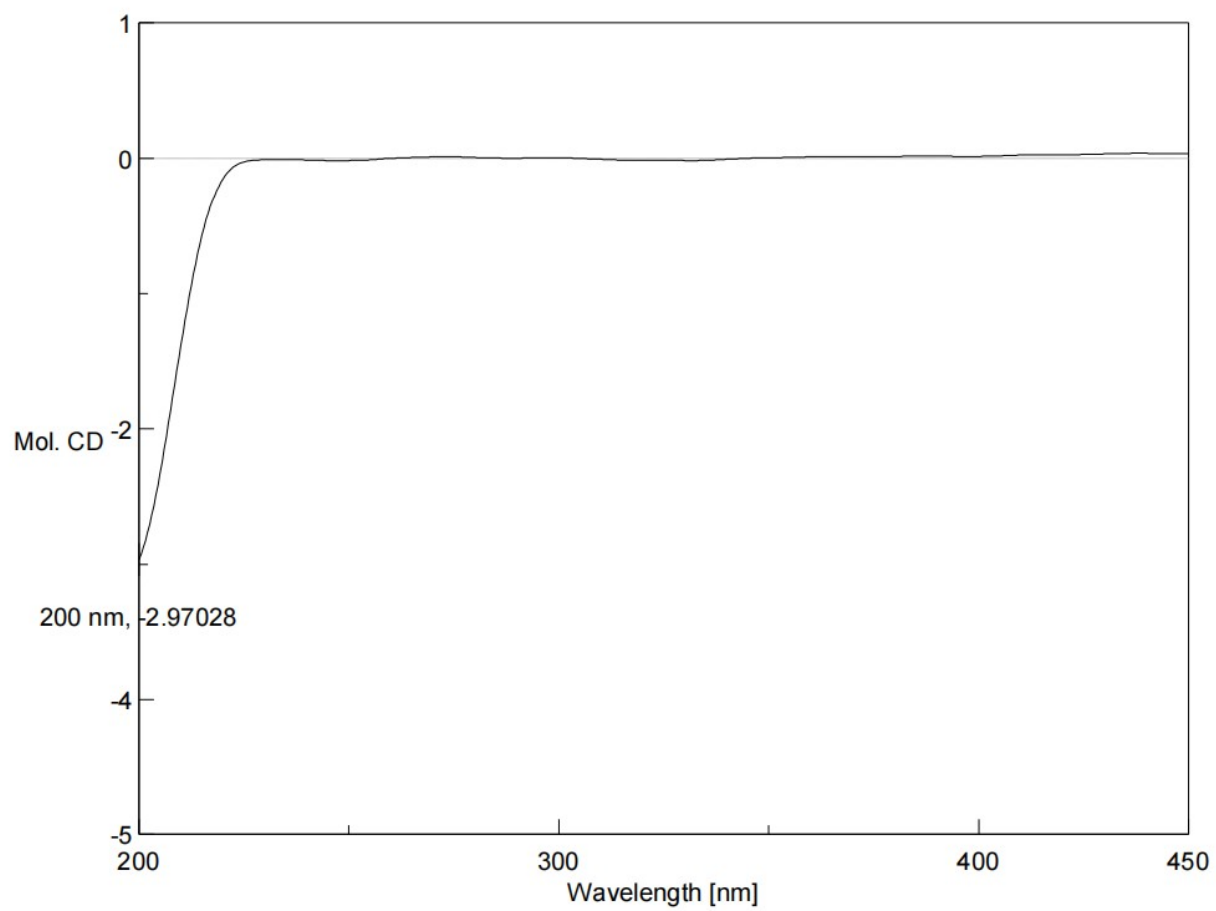

Figure S41. HRESIMS (MeOH) spectrum of compound 5.

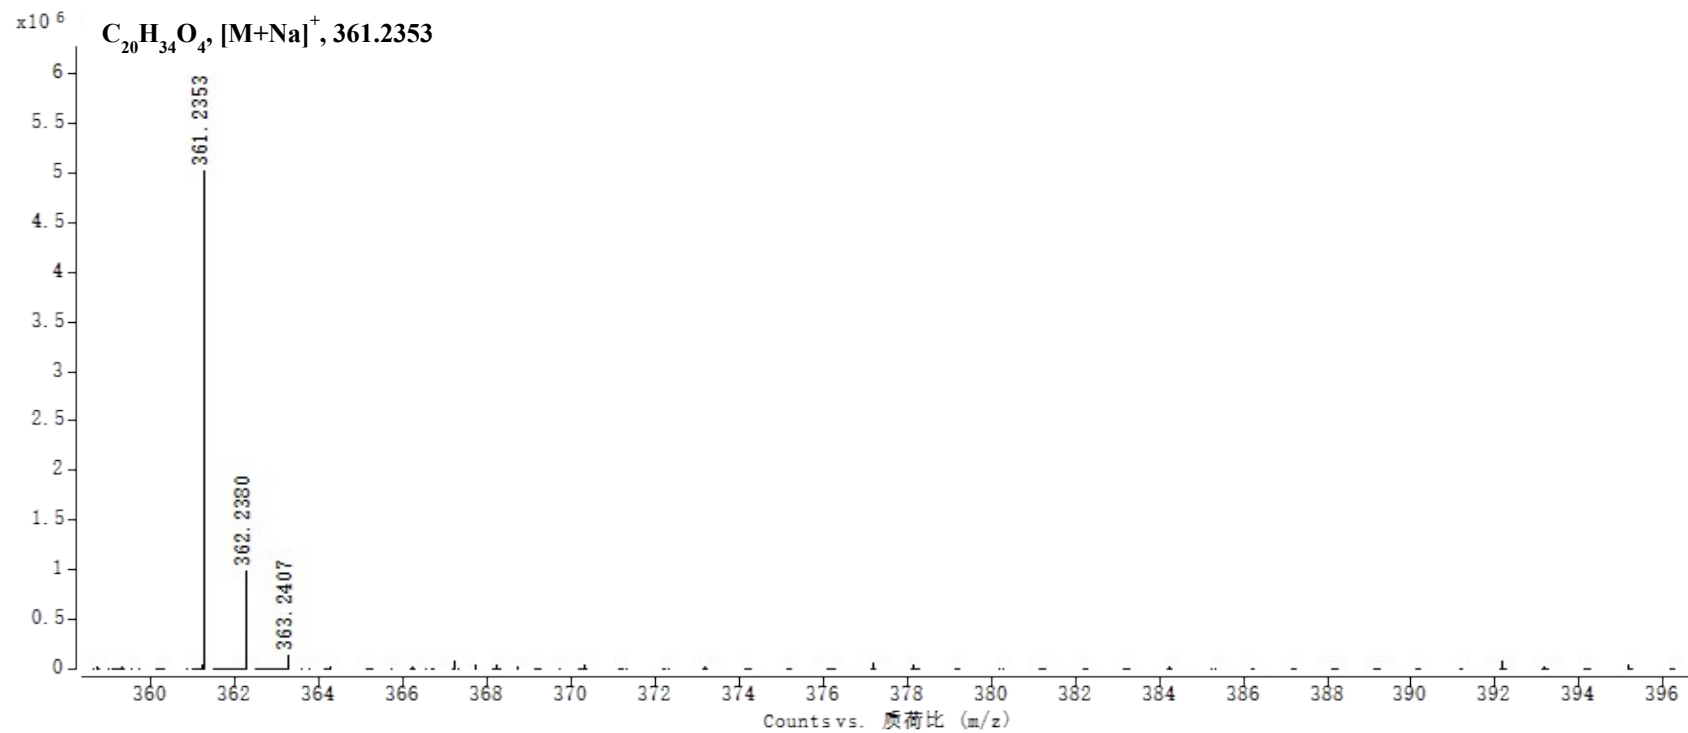

Figure S42. <sup>1</sup>H NMR (600 MHz, CD<sub>3</sub>OD) spectrum of compound 5.

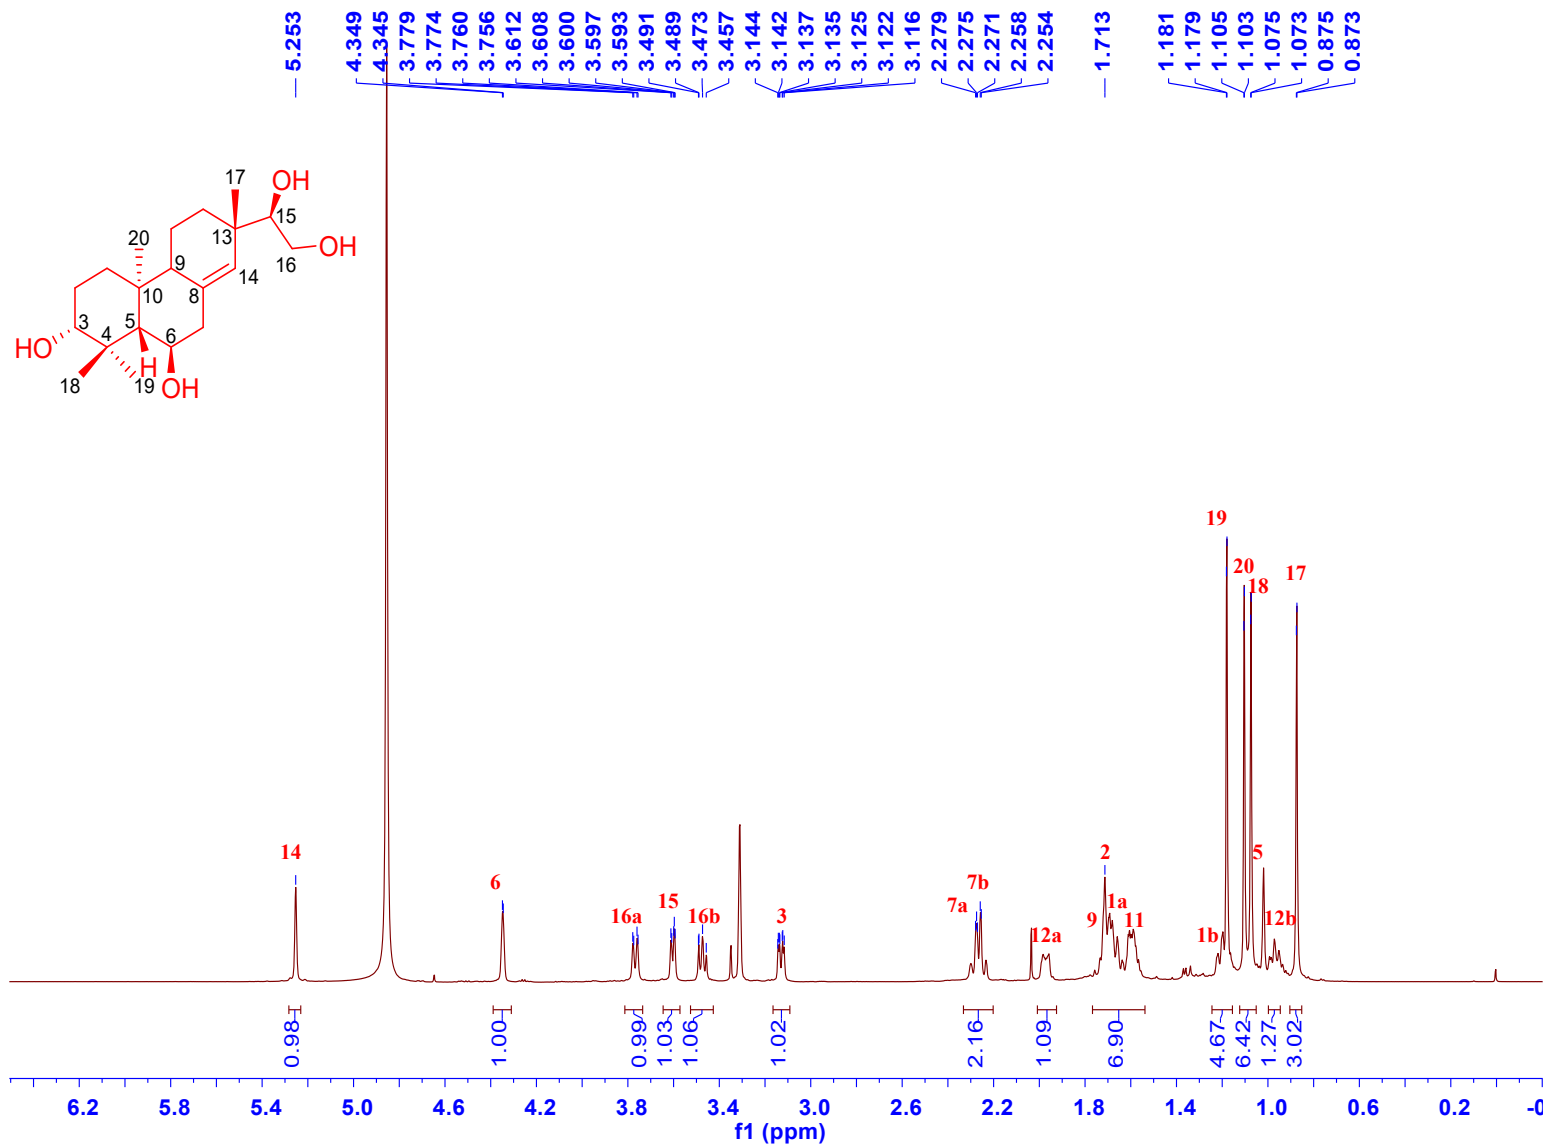

Figure S43.  $^{13}\text{C}$  NMR (150 MHz,  $\text{CD}_3\text{OD}$ ) spectrum of compound 5.

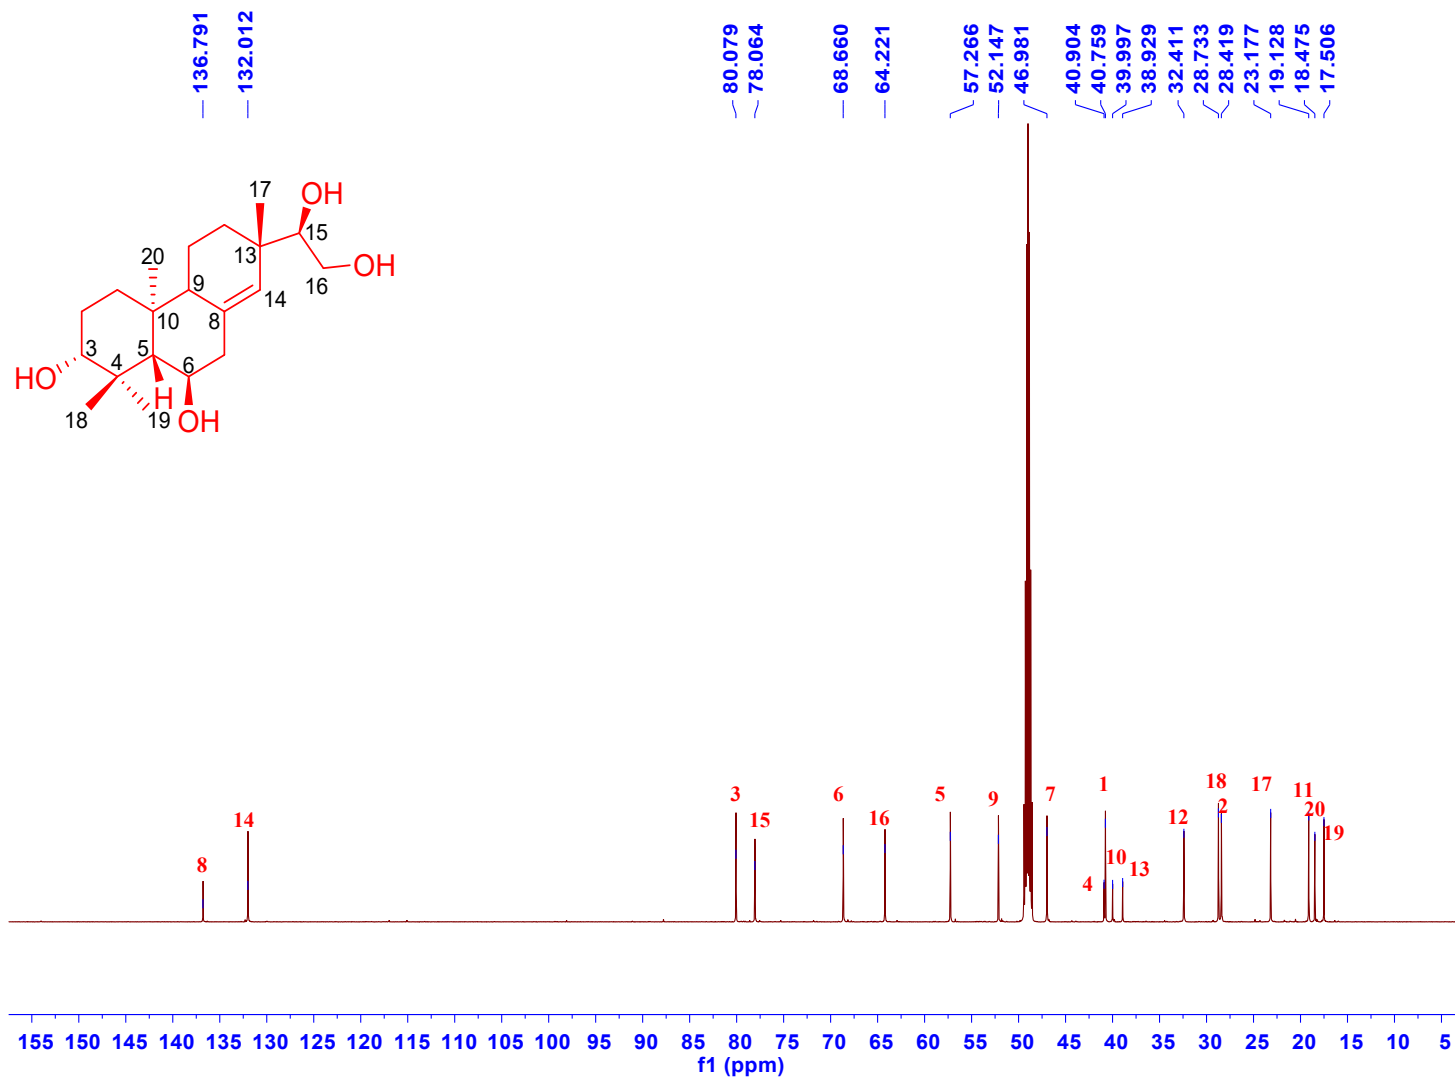

**Figure S44. HSQC (CD<sub>3</sub>OD) spectrum of compound 5.**

**Figure S45. HMBC (CD<sub>3</sub>OD) spectrum of compound 5.**

**Figure S46. <sup>1</sup>H-<sup>1</sup>H COSY (CD<sub>3</sub>OD) spectrum of compound 5.**

**Figure S47. NOESY (CD<sub>3</sub>OD) spectrum of compound 5.**

Figure S48. IR spectrum of compound 5.

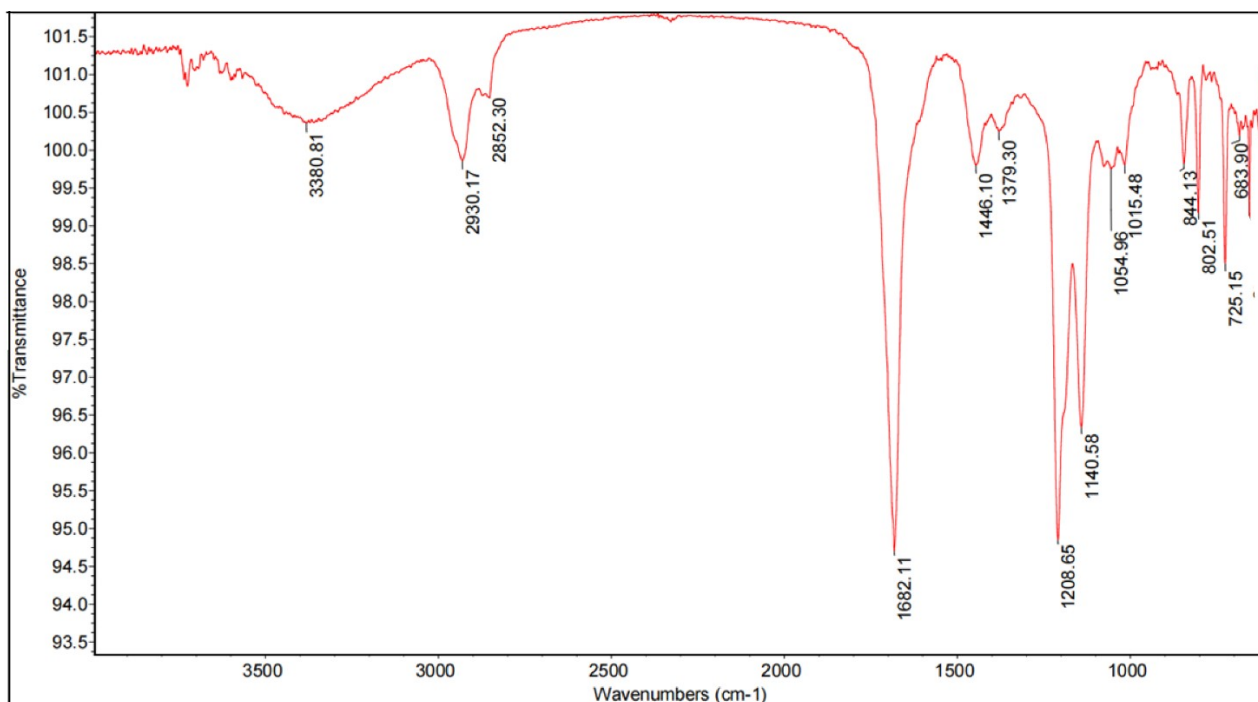

Figure S49. UV spectrum of compound 5.

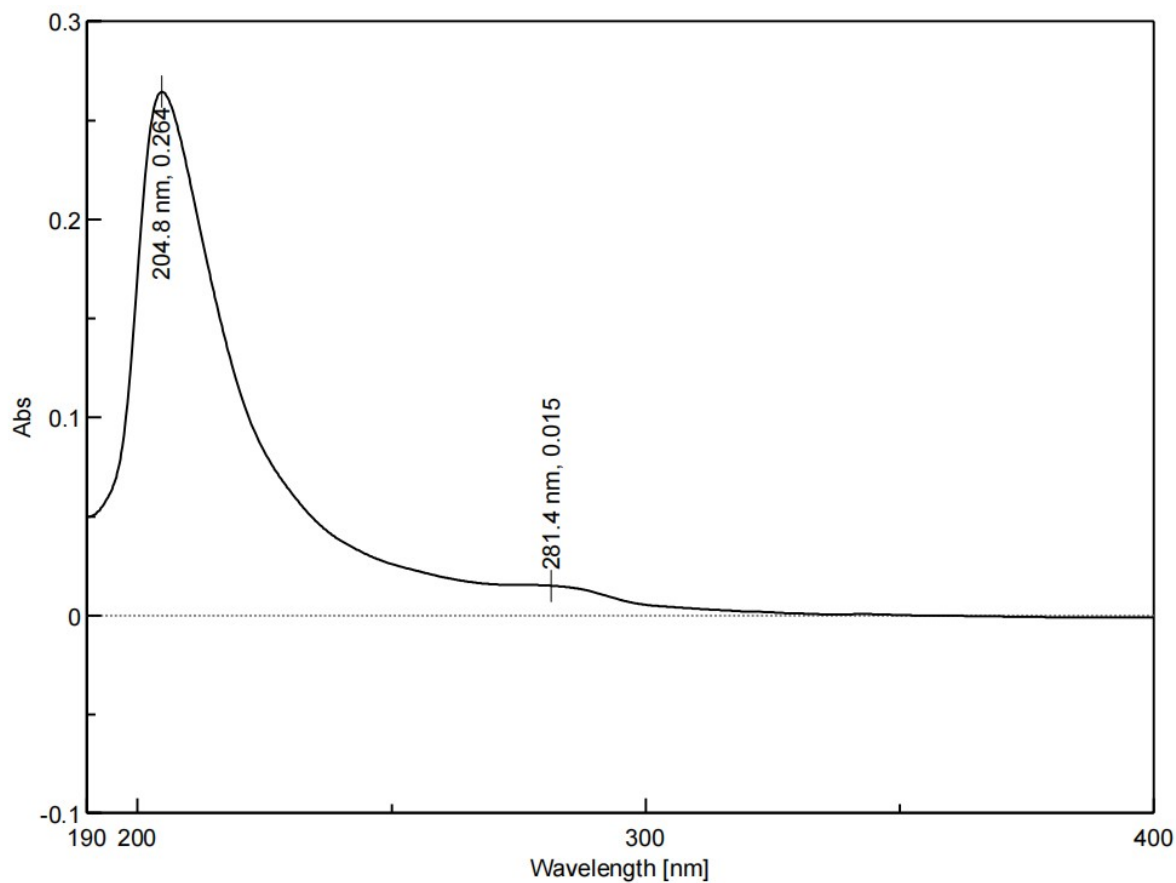

Figure S50. CD spectrum of compound 5.

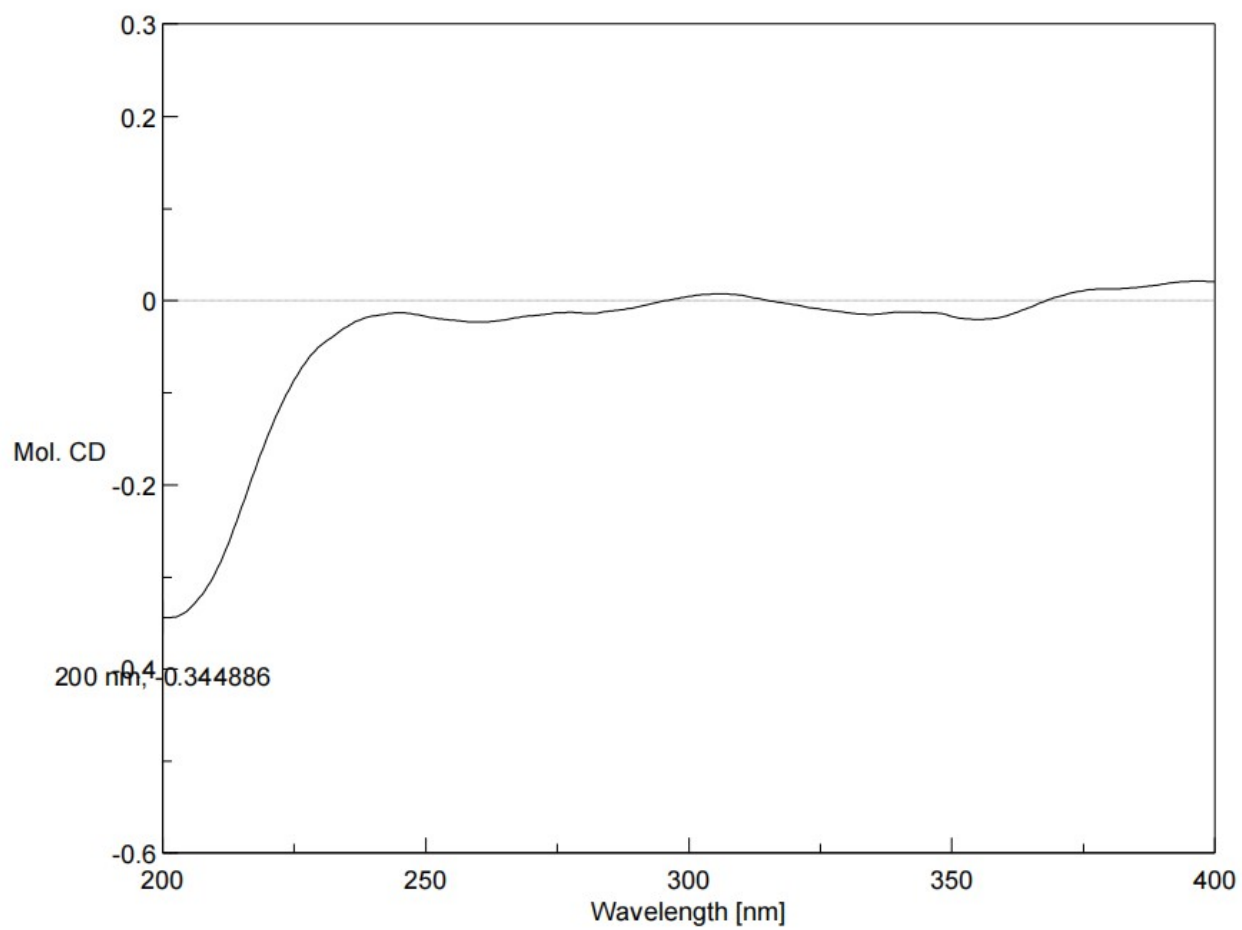

Figure S51. HRESIMS (MeOH) spectrum of compound 6.

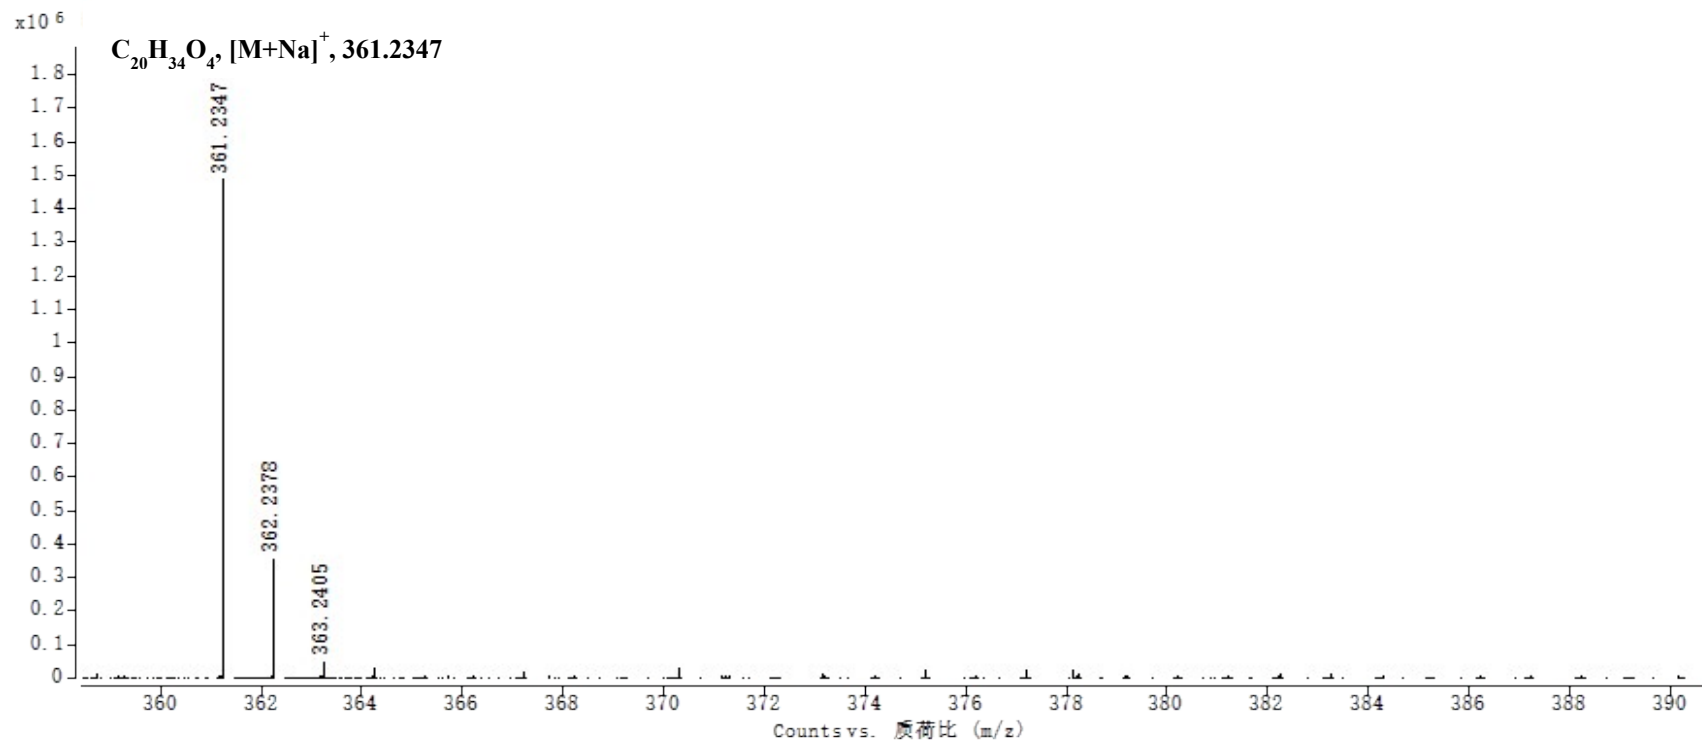

Figure S52. <sup>1</sup>H NMR (600 MHz, CD<sub>3</sub>OD) spectrum of compound 6.

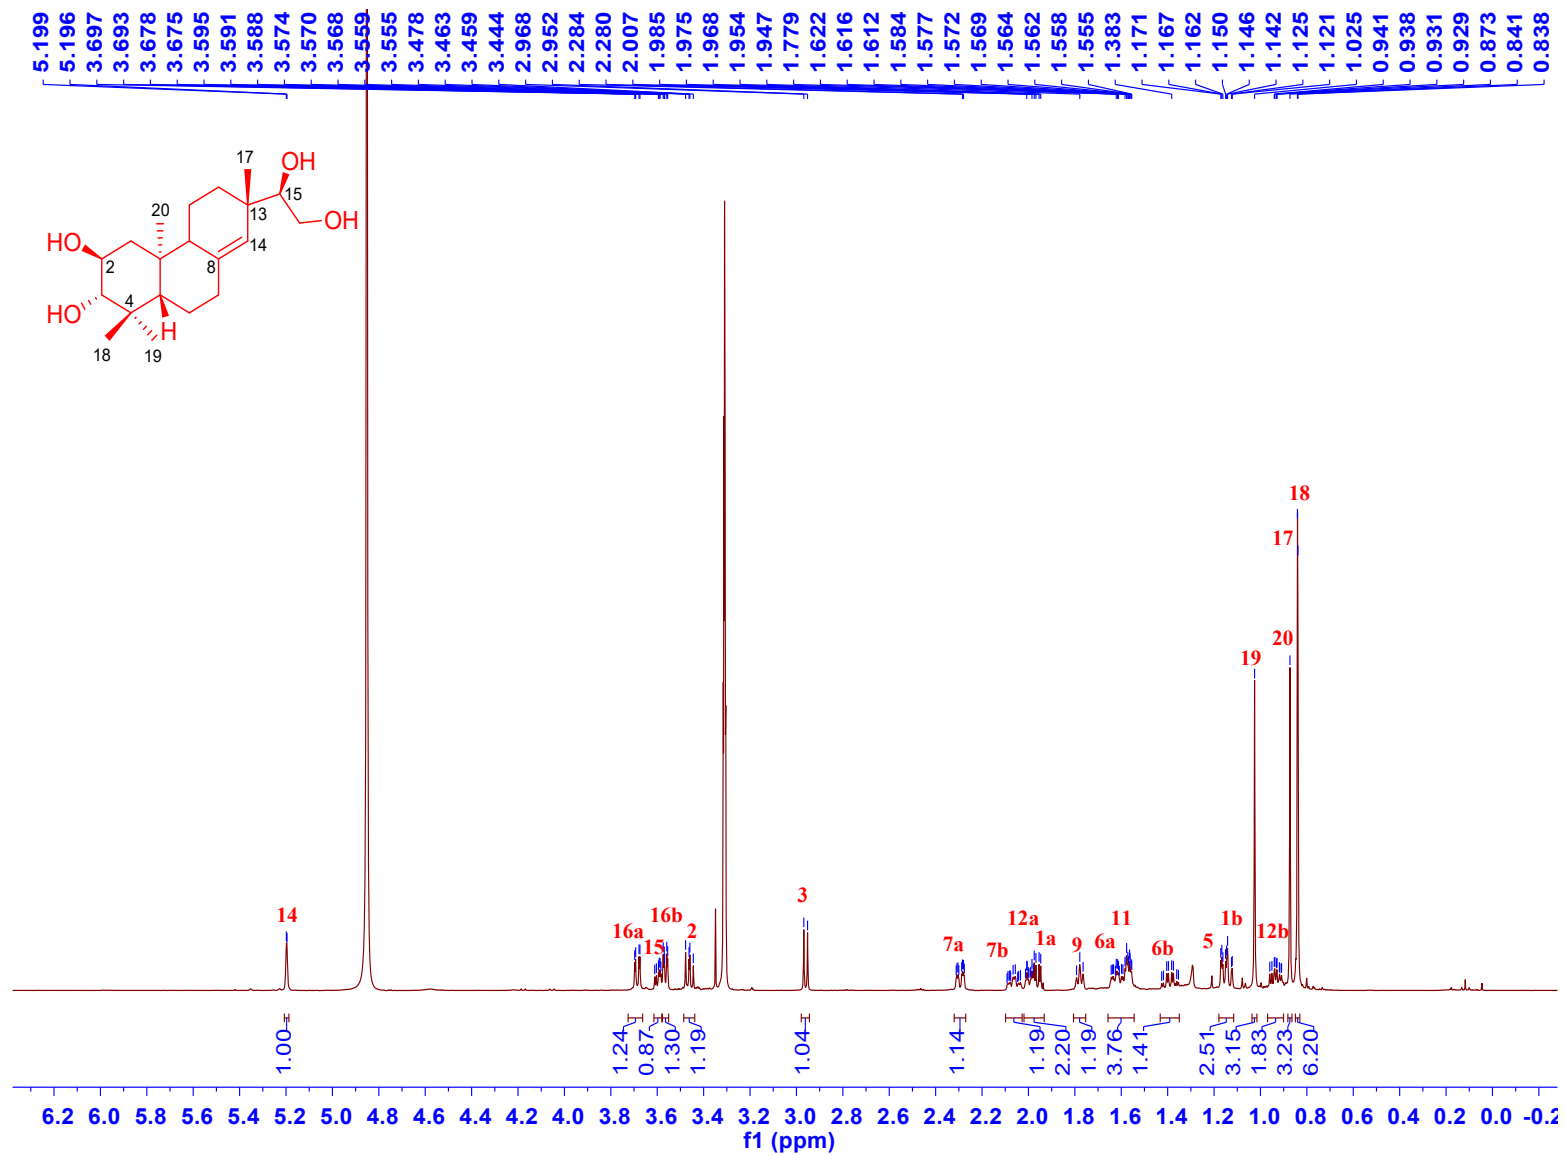

Figure S53.  $^{13}\text{C}$  NMR (150 MHz,  $\text{CD}_3\text{OD}$ ) spectrum of compound 6.

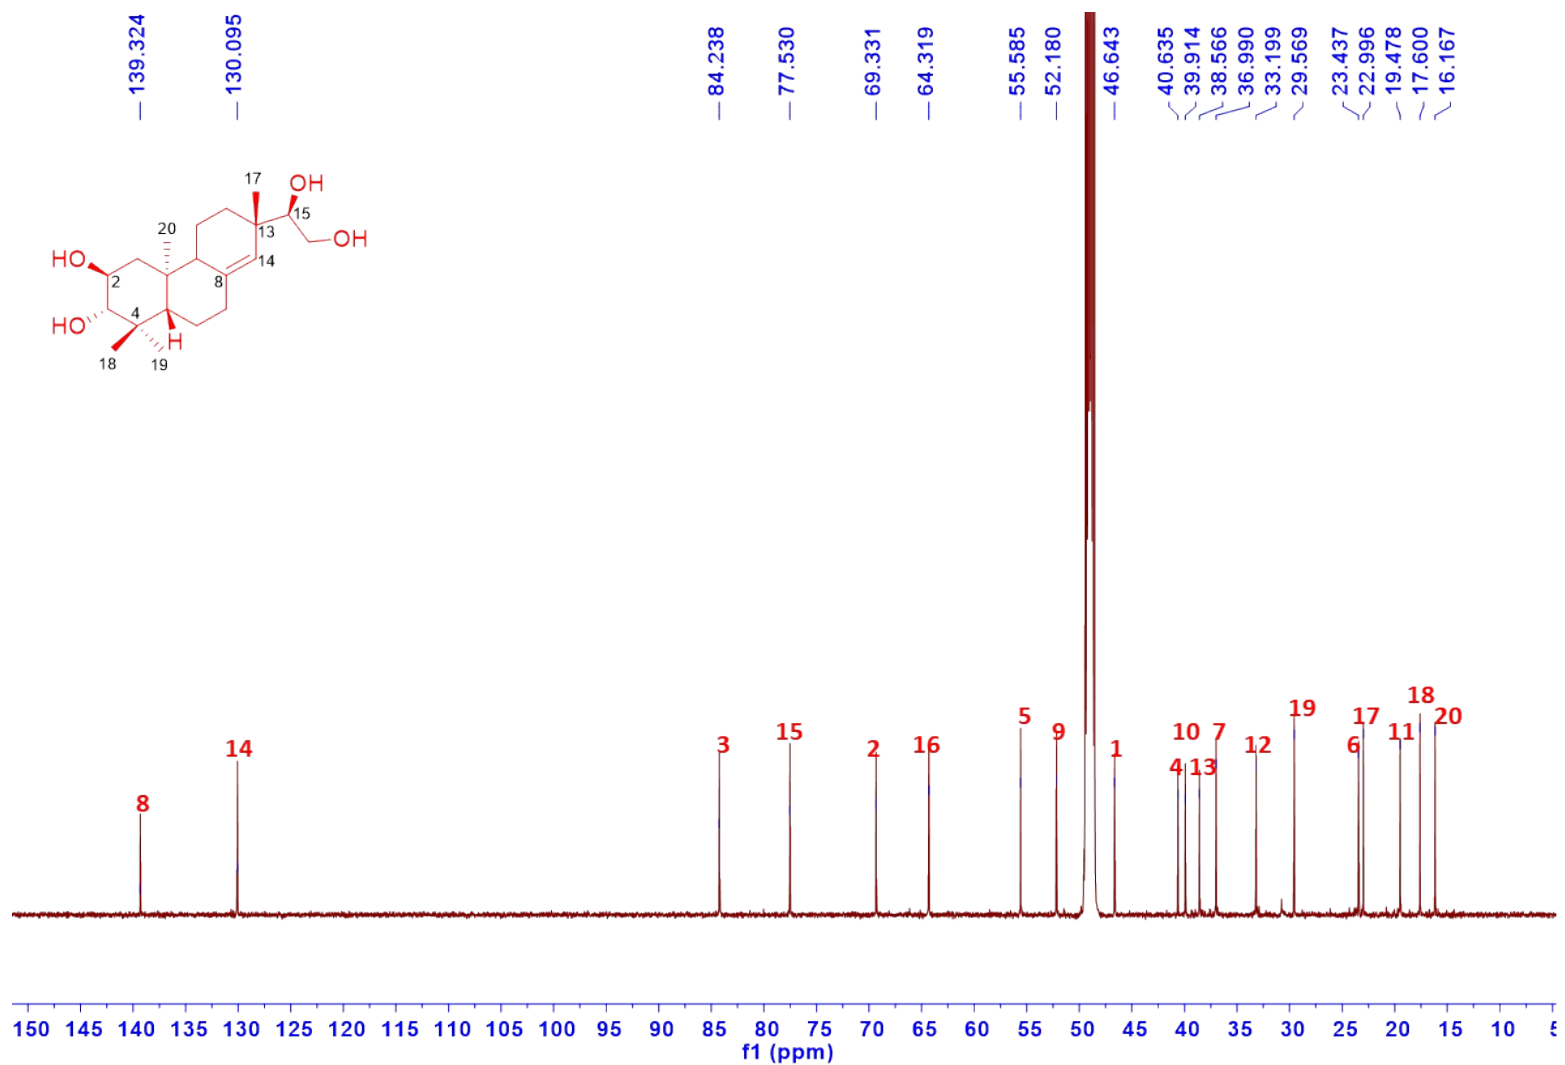

**Figure S54. HSQC (CD<sub>3</sub>OD) spectrum of compound 6.**

**Figure S55. HMBC (CD<sub>3</sub>OD) spectrum of compound 6.**

**Figure S56. <sup>1</sup>H-<sup>1</sup>H COSY (CD<sub>3</sub>OD) spectrum of compound 6.**

**Figure S57. NOESY (CD<sub>3</sub>OD) spectrum of compound 6.**

Figure S58. IR spectrum of compound 6.

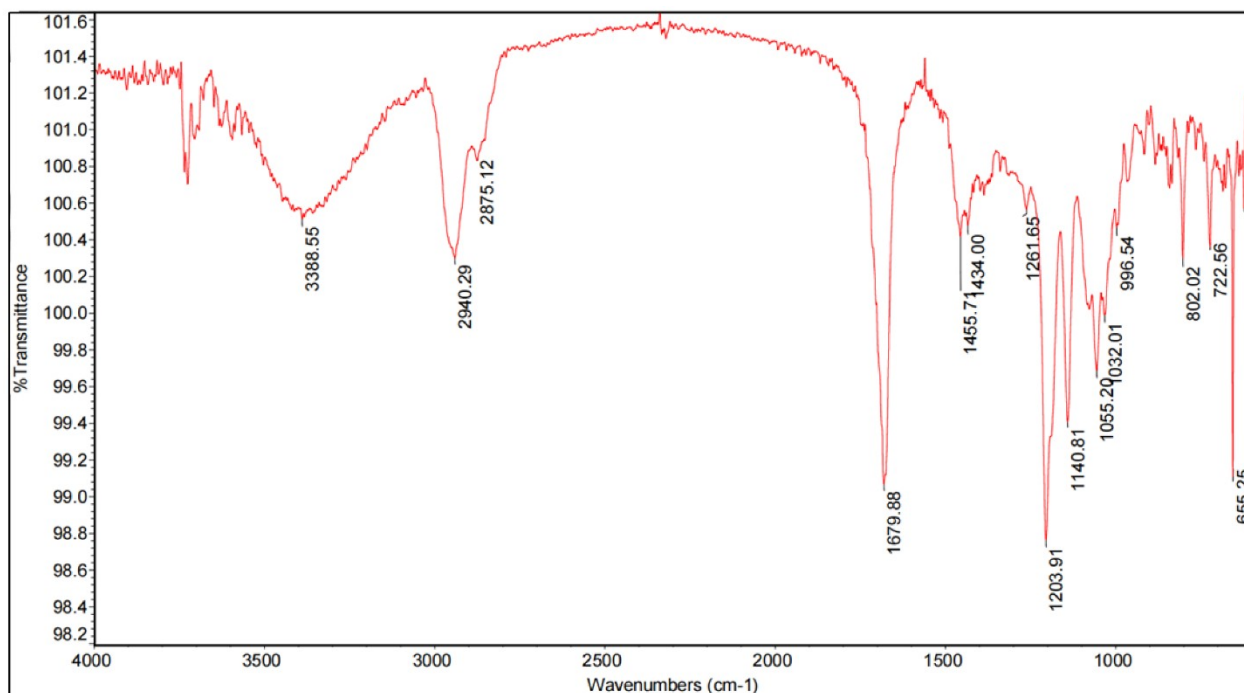

Figure S59. UV spectrum of compound 6.

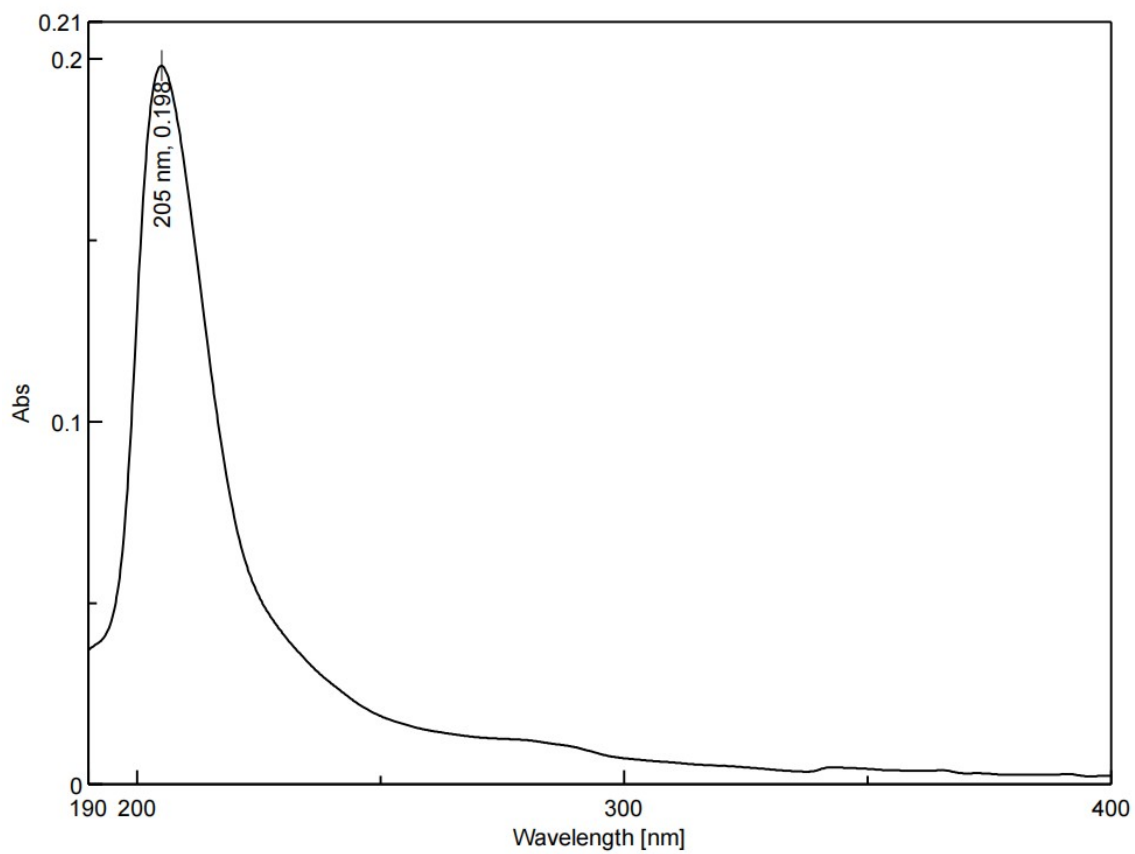

**Figure S60. CD spectrum of compound 6.**

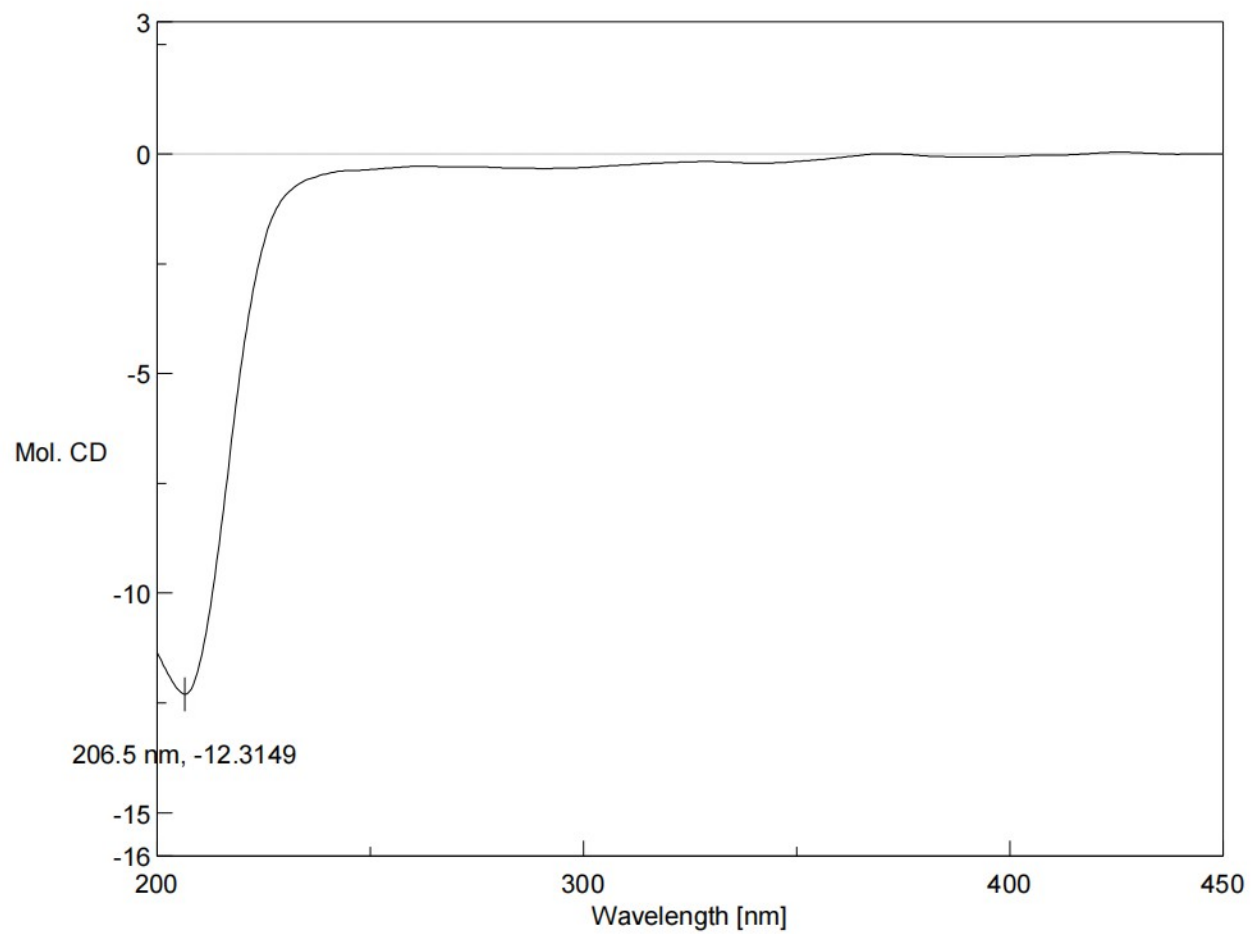

Figure S61. HRESIMS (MeOH) spectrum of compound 7.

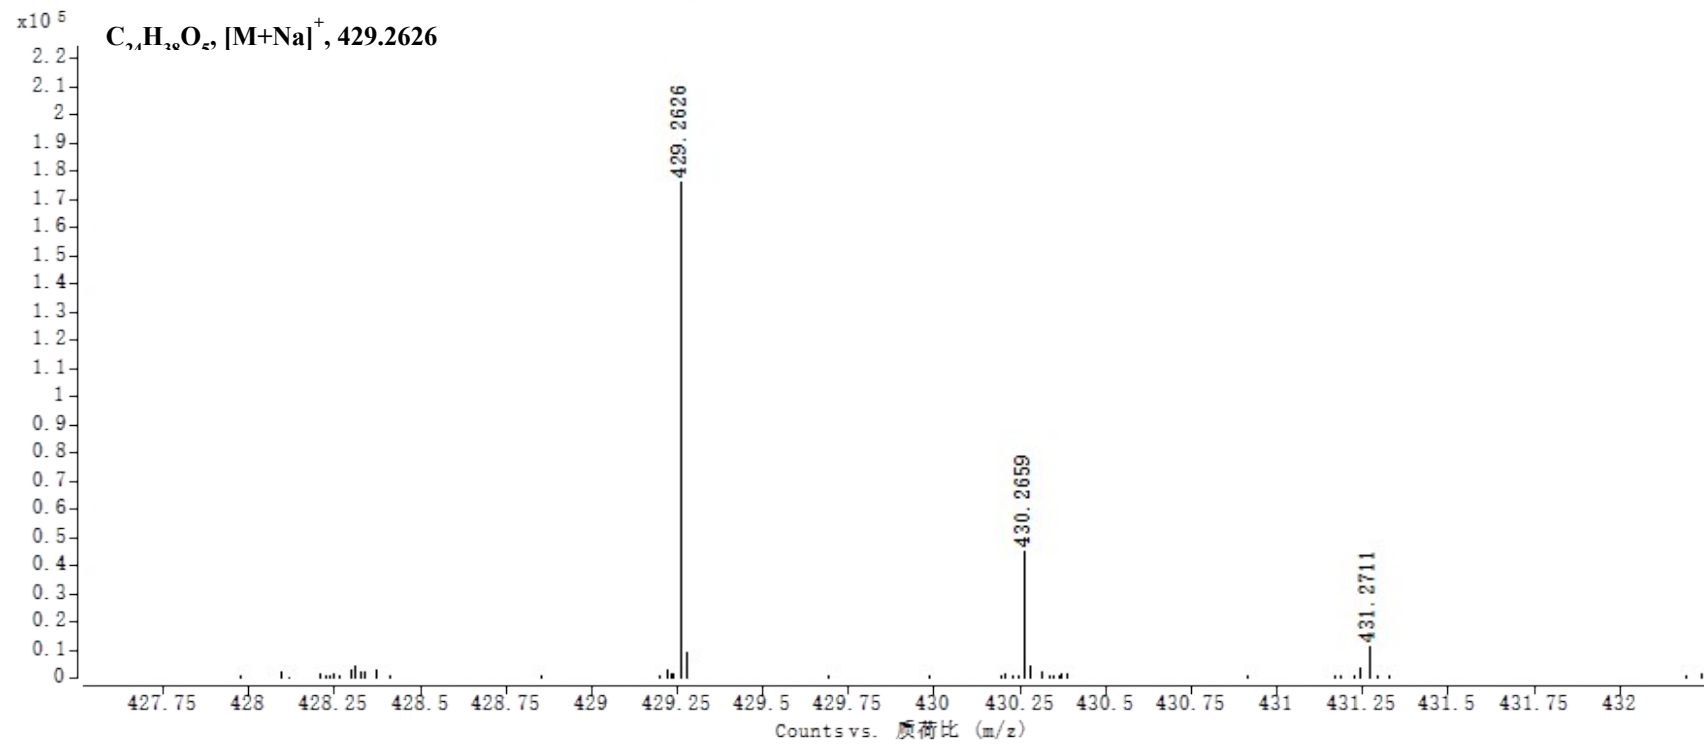

Figure S62. <sup>1</sup>H NMR (600 MHz, CD<sub>3</sub>OD) spectrum of compound 7.

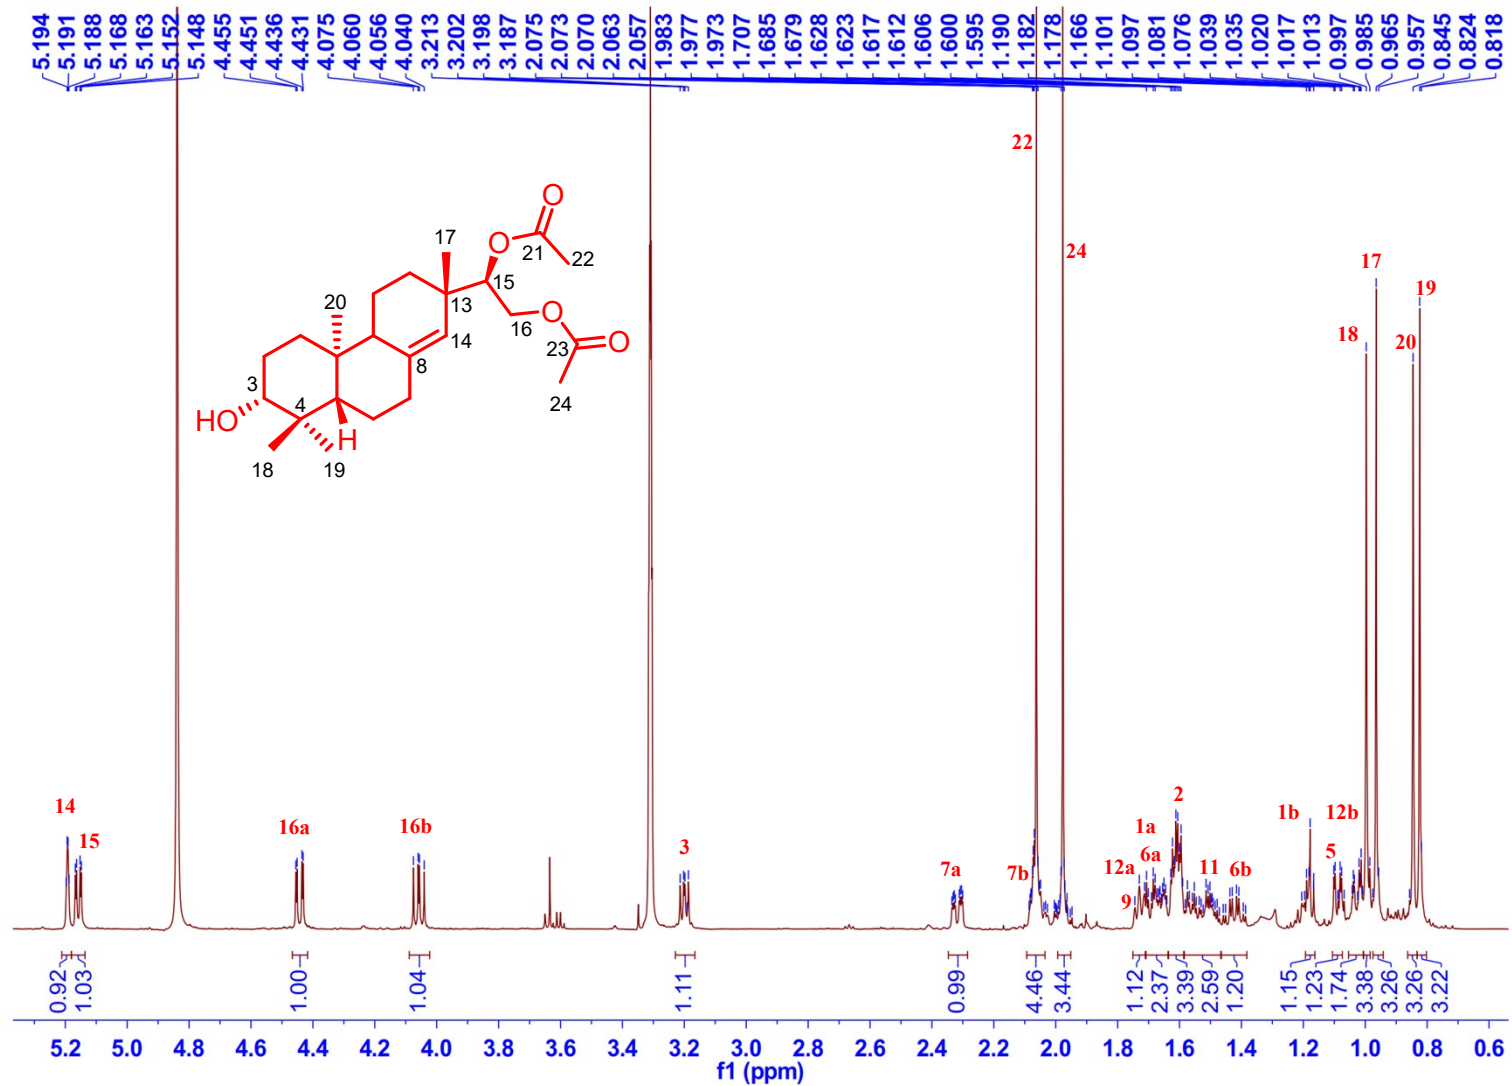

Figure S63.  $^{13}\text{C}$  NMR (150 MHz,  $\text{CD}_3\text{OD}$ ) spectrum of compound 7.

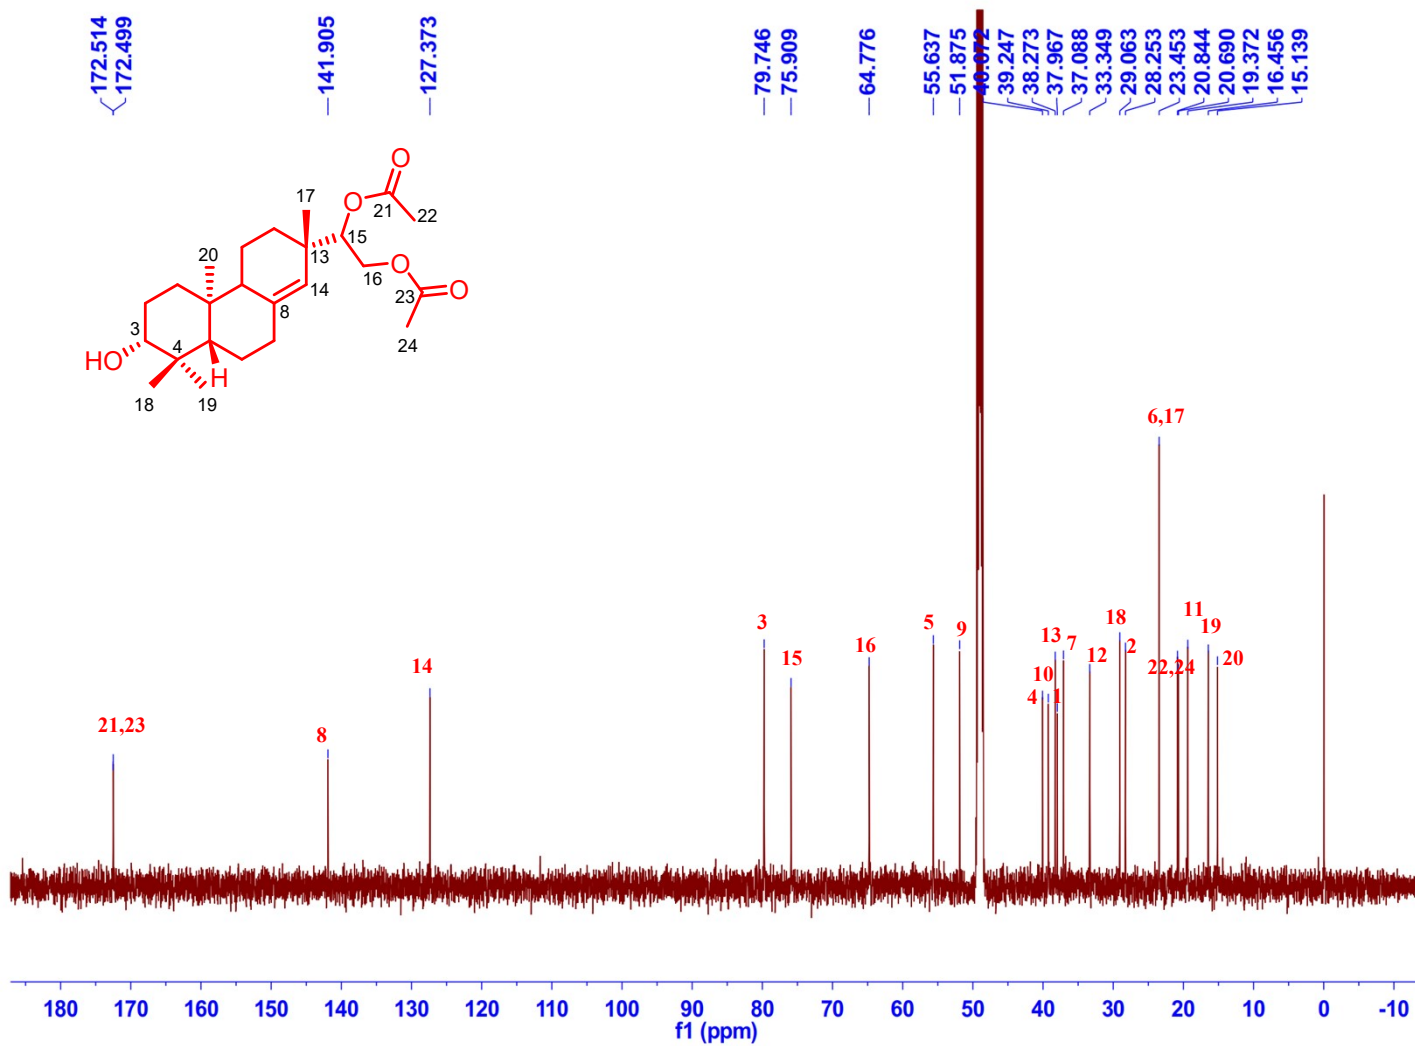

**Figure S64. HSQC (CD<sub>3</sub>OD) spectrum of compound 7.**

**Figure S65. HMBC (CD<sub>3</sub>OD) spectrum of compound 7.**

**Figure S66. <sup>1</sup>H-<sup>1</sup>H COSY (CD<sub>3</sub>OD) spectrum of compound 7.**

**Figure S67. NOESY (CD<sub>3</sub>OD) spectrum of compound 7.**

Figure S68. IR spectrum of compound 7.

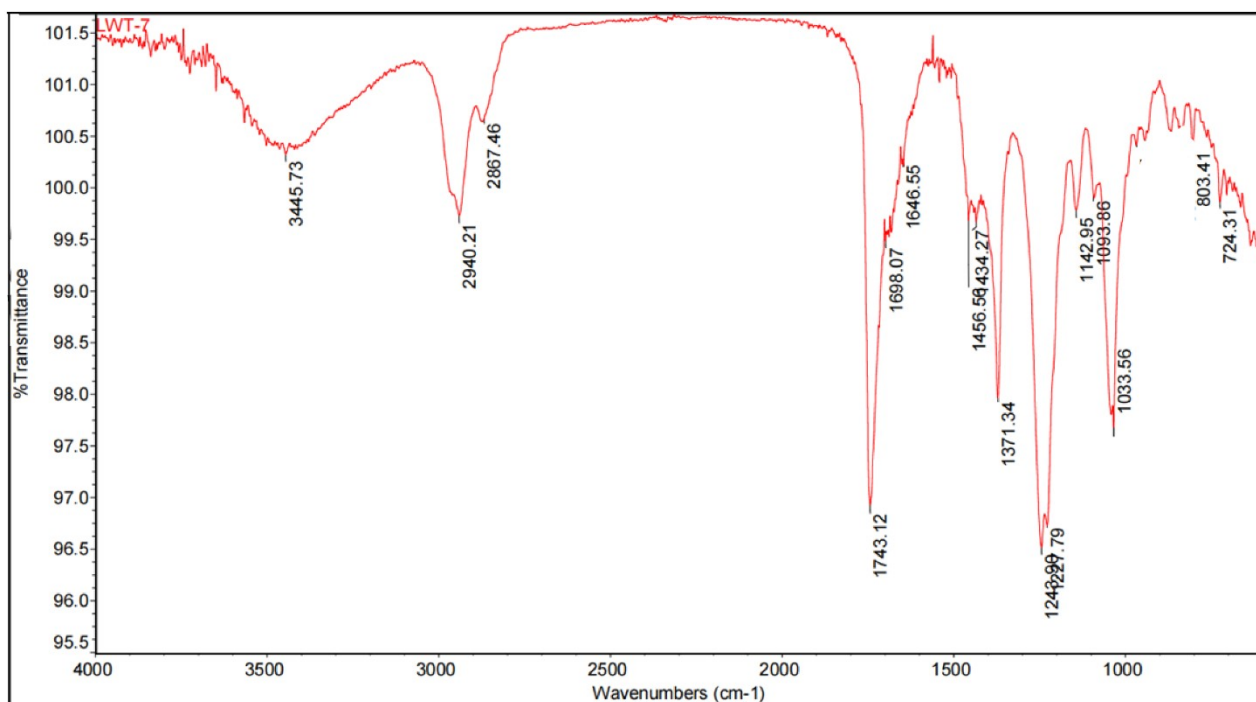

Figure S69. UV spectrum of compound 7.

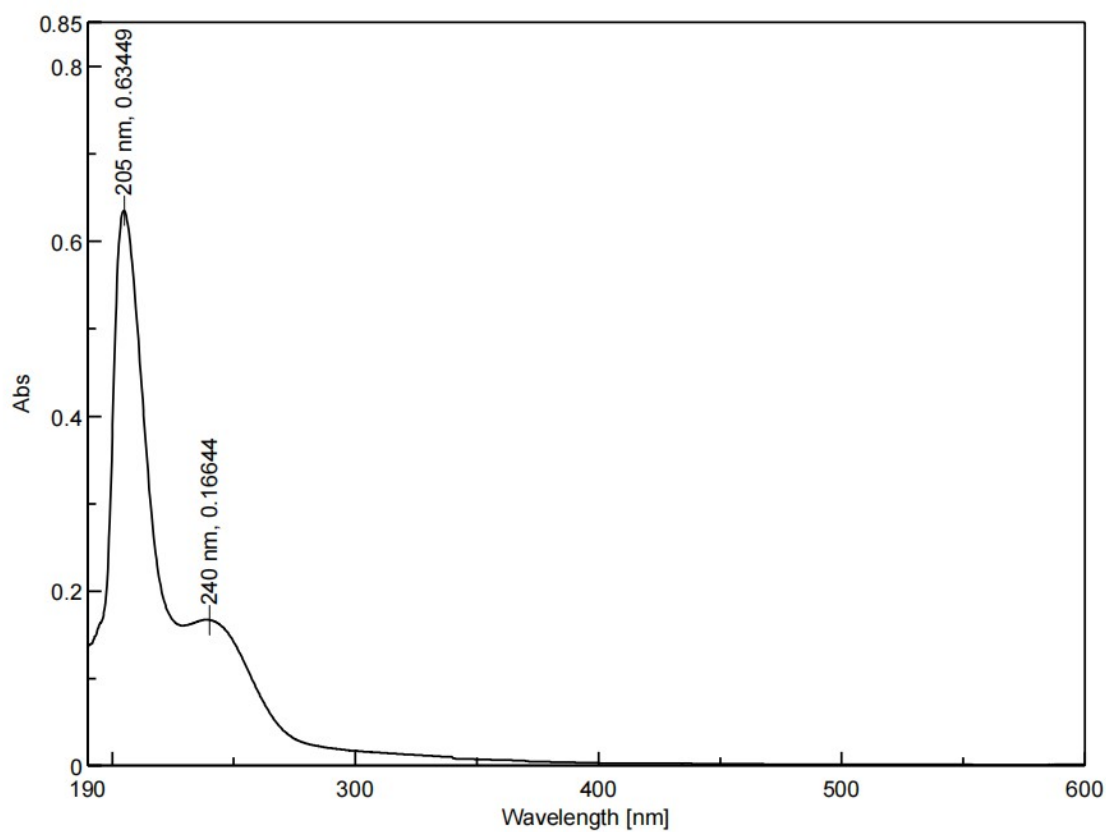

Figure S70. CD spectrum of compound 7.

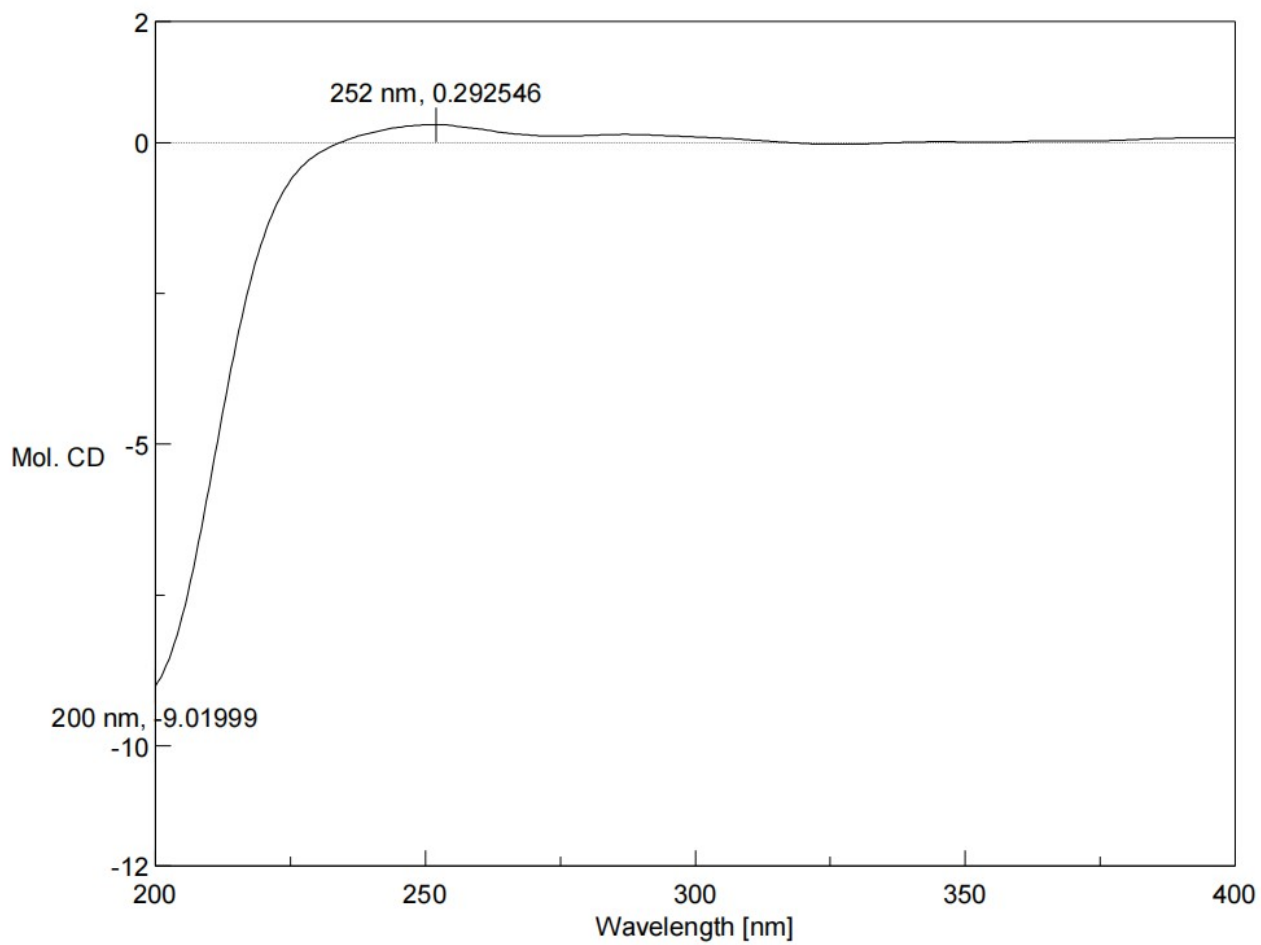

Figure S71. HRESIMS (MeOH) spectrum of compound 8.

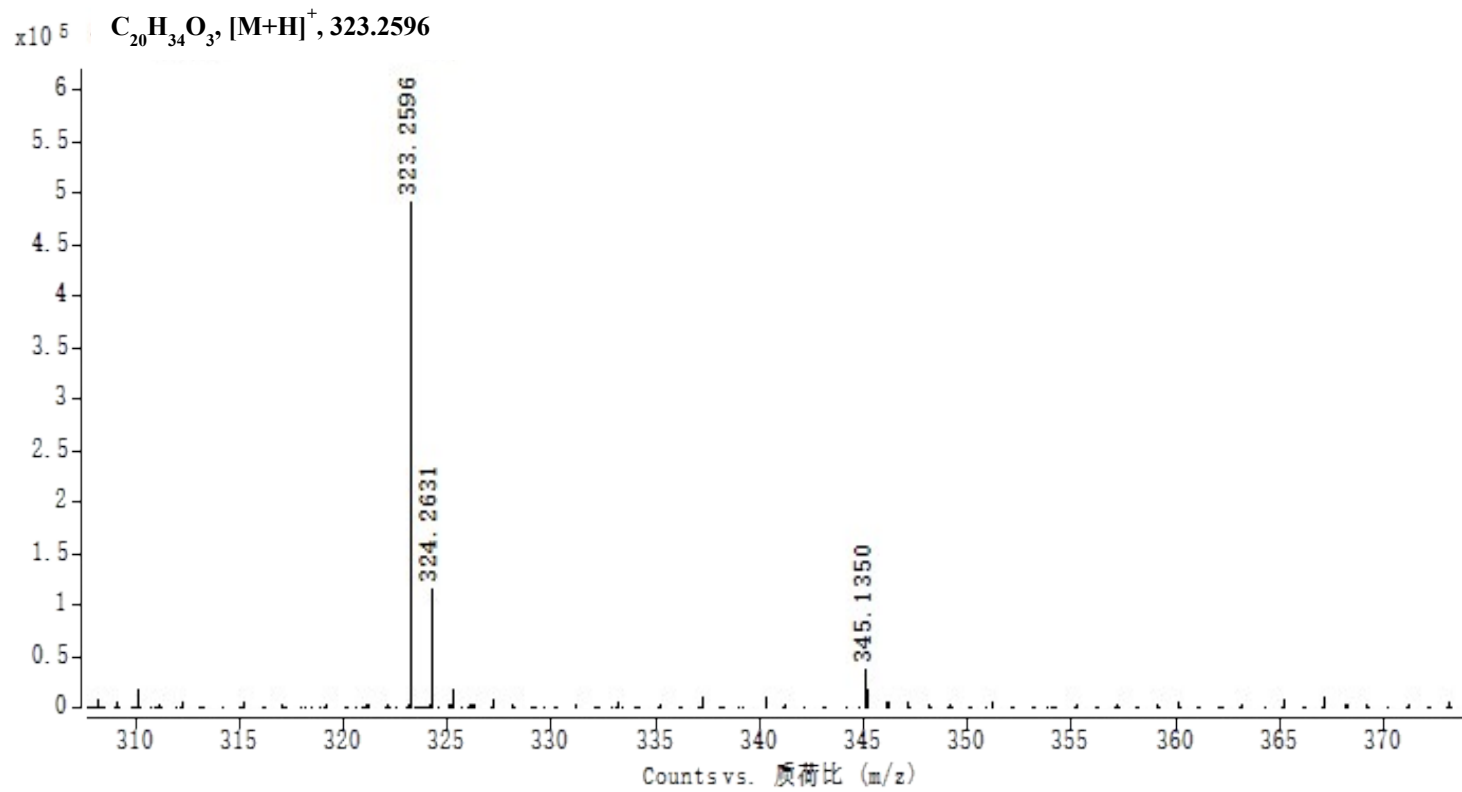

Figure S72. <sup>1</sup>H NMR (600 MHz, CD<sub>3</sub>OD) spectrum of compound 8.

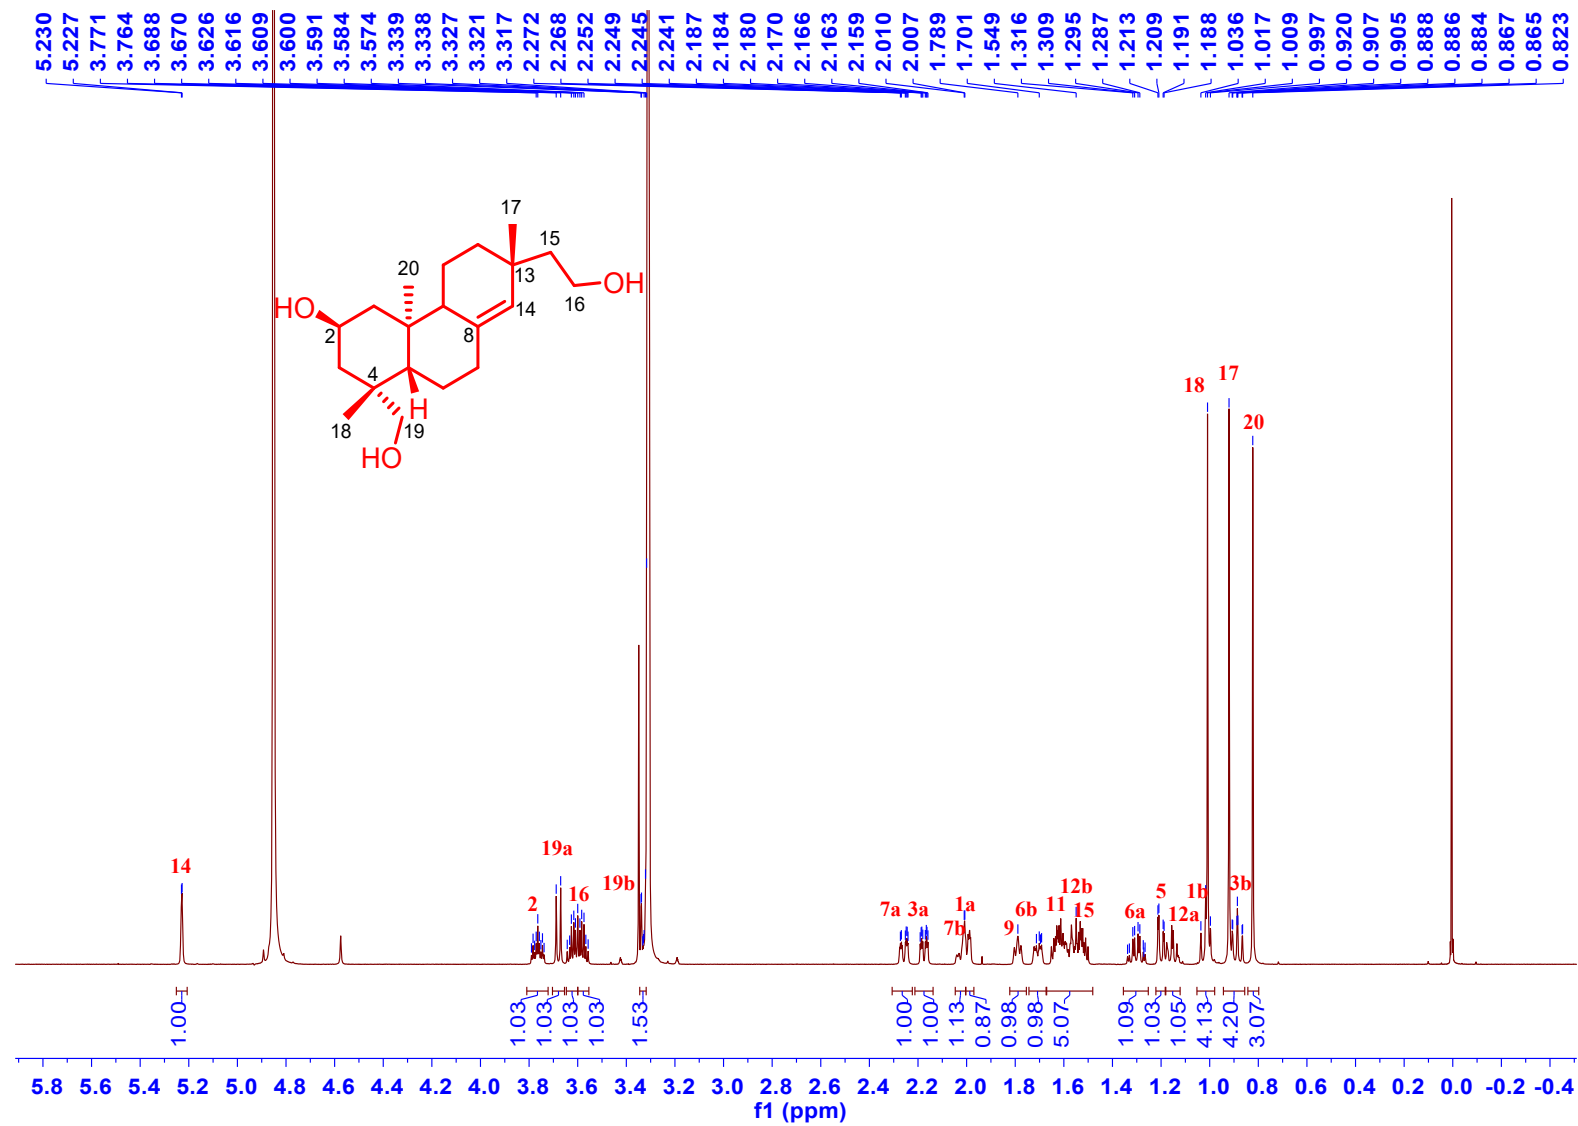

Figure S73.  $^{13}\text{C}$  NMR (150 MHz,  $\text{CD}_3\text{OD}$ ) spectrum of compound 8.

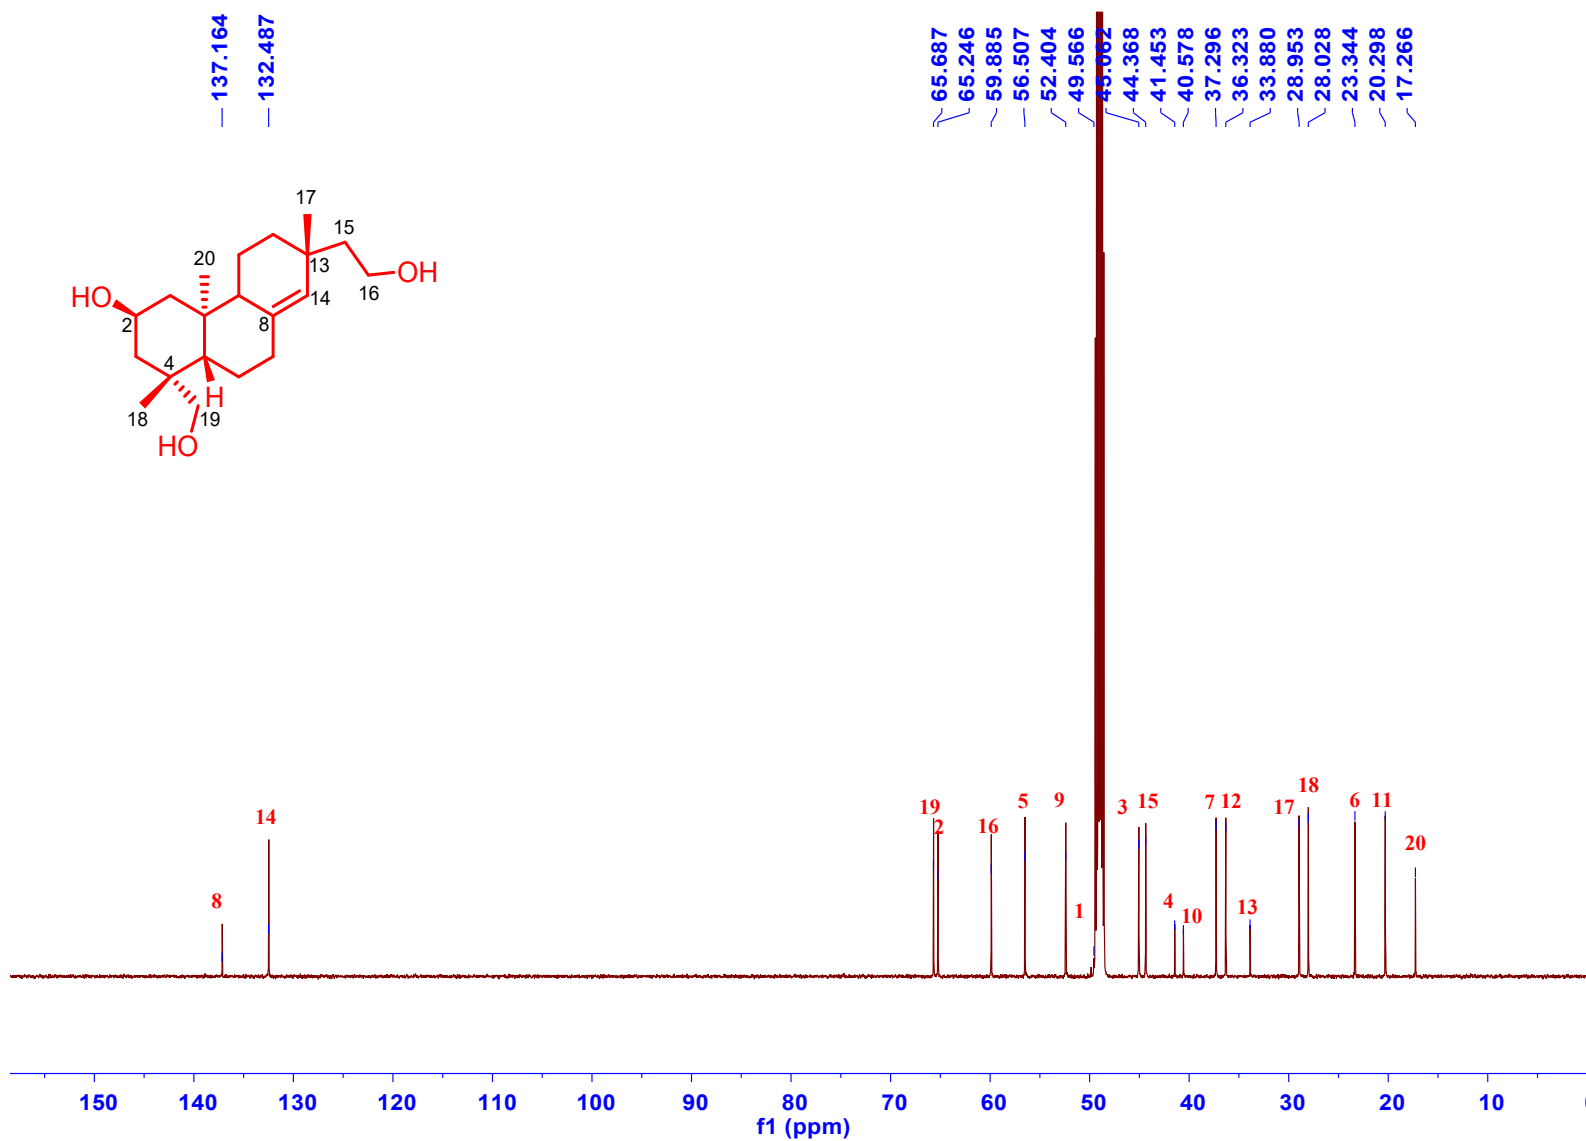

**Figure S74. HSQC (CD<sub>3</sub>OD) spectrum of compound 8.**

**Figure S75. HMBC (CD<sub>3</sub>OD) spectrum of compound 8.**

**Figure S76. <sup>1</sup>H-<sup>1</sup>H COSY (CD<sub>3</sub>OD) spectrum of compound 8.**

**Figure S77. NOESY (CD<sub>3</sub>OD) spectrum of compound 8.**

Figure S78. IR spectrum of compound 8.

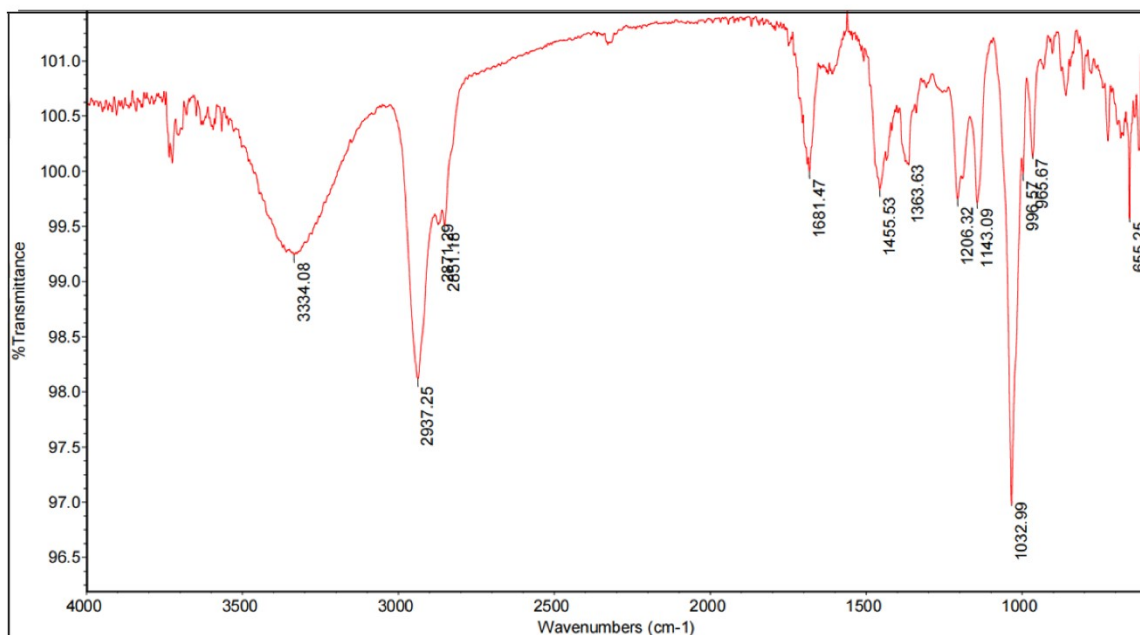

Figure S79. UV spectrum of compound 8.

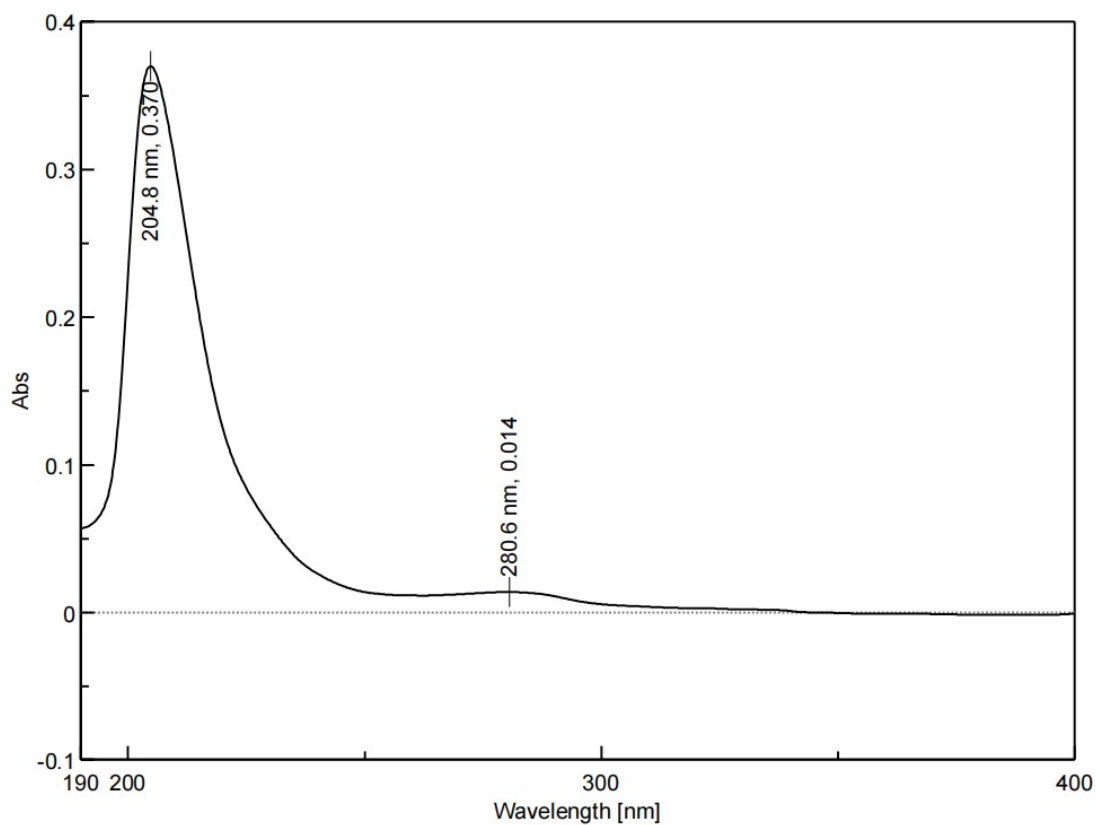

Figure S80. CD spectrum of compound 8.

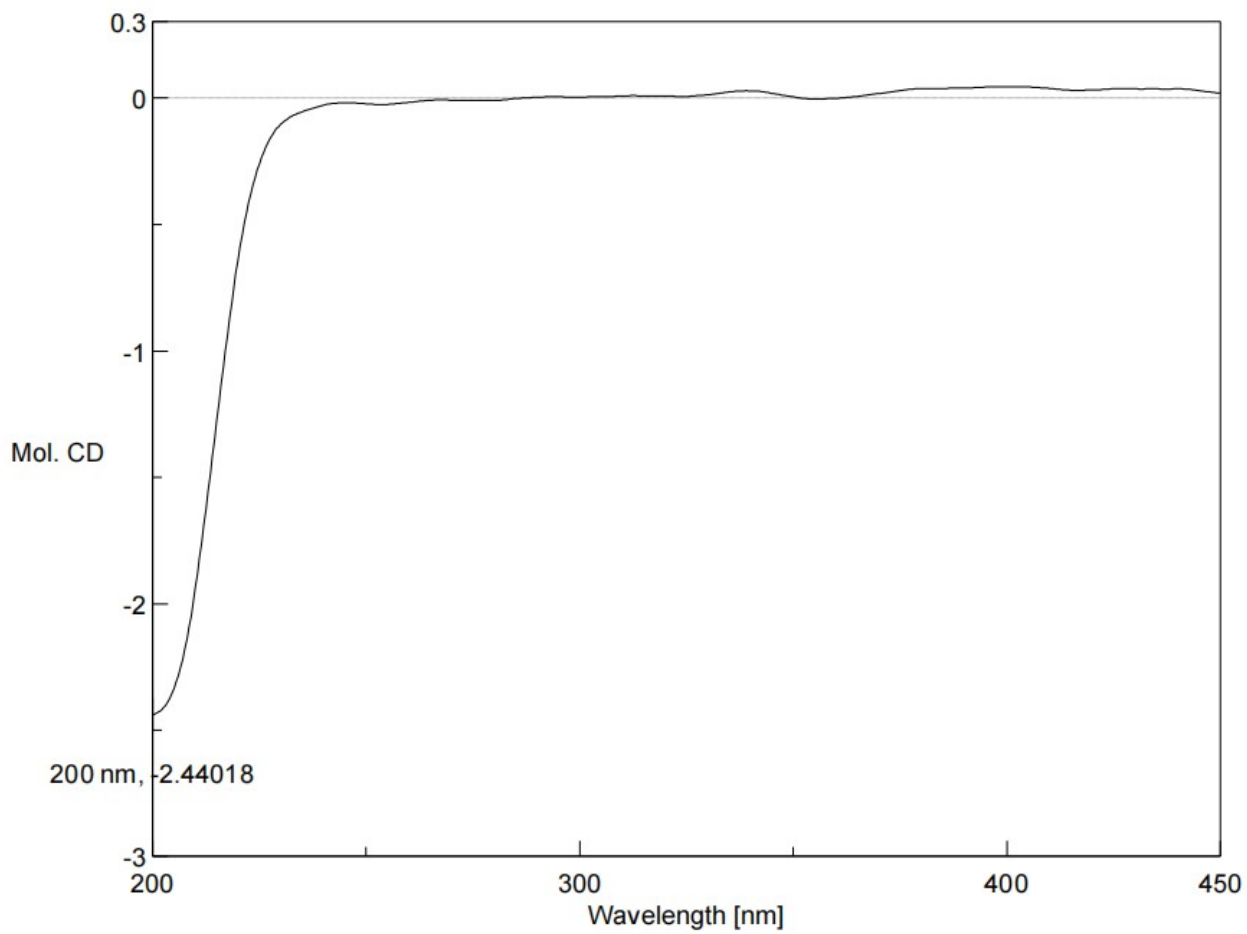

Figure S81. <sup>1</sup>H NMR (600 MHz, CD<sub>3</sub>OD) spectrum of compound 9.

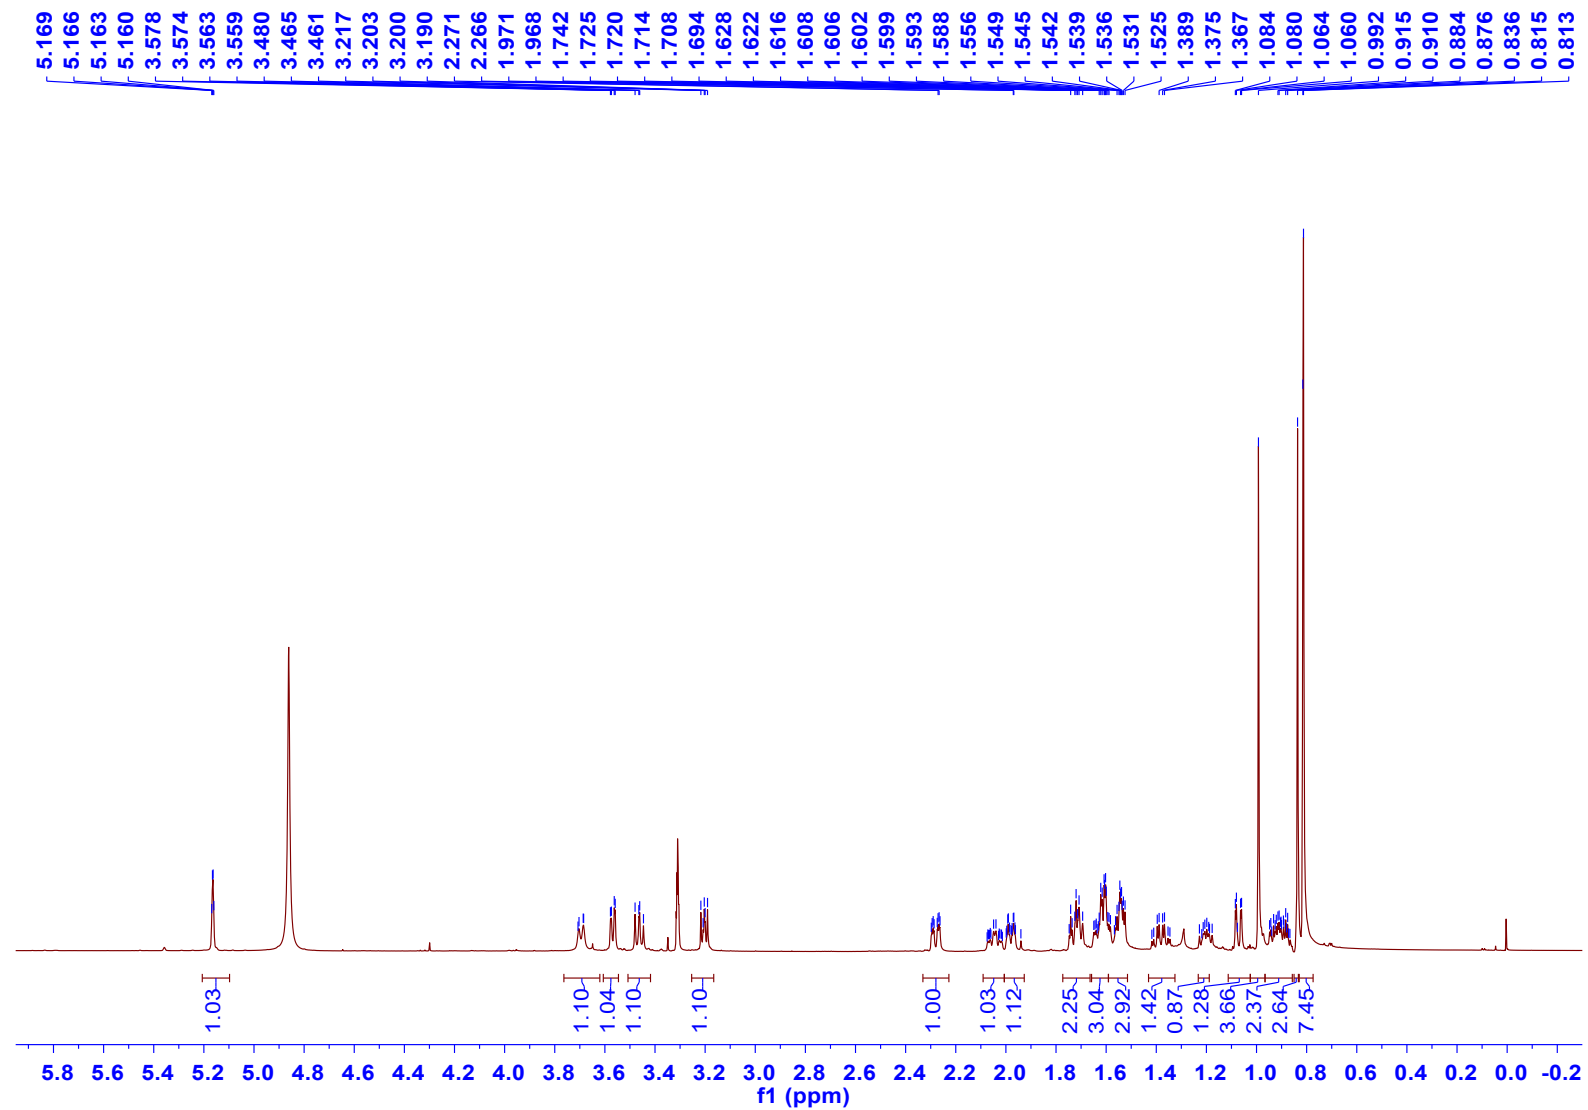

Figure S82.  $^{13}\text{C}$  NMR (150 MHz,  $\text{CD}_3\text{OD}$ ) spectrum of compound 9.

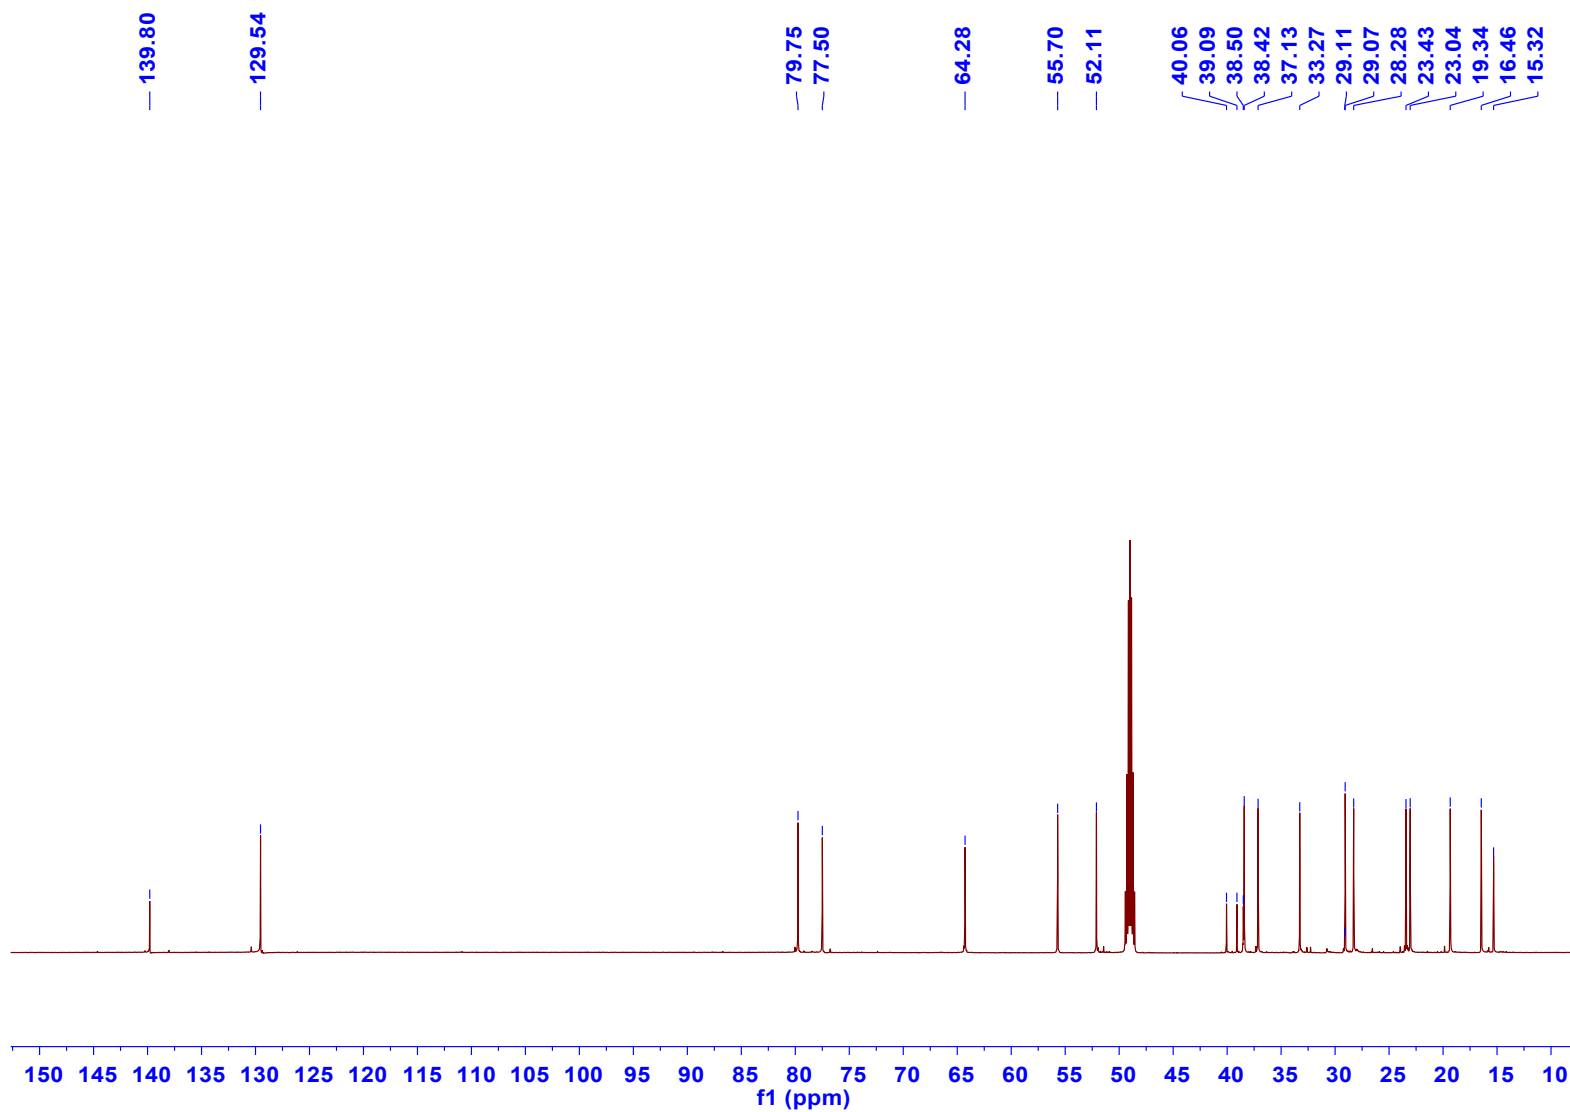

Figure S83. <sup>1</sup>H NMR (600 MHz, CD<sub>3</sub>OD) spectrum of compound 10.

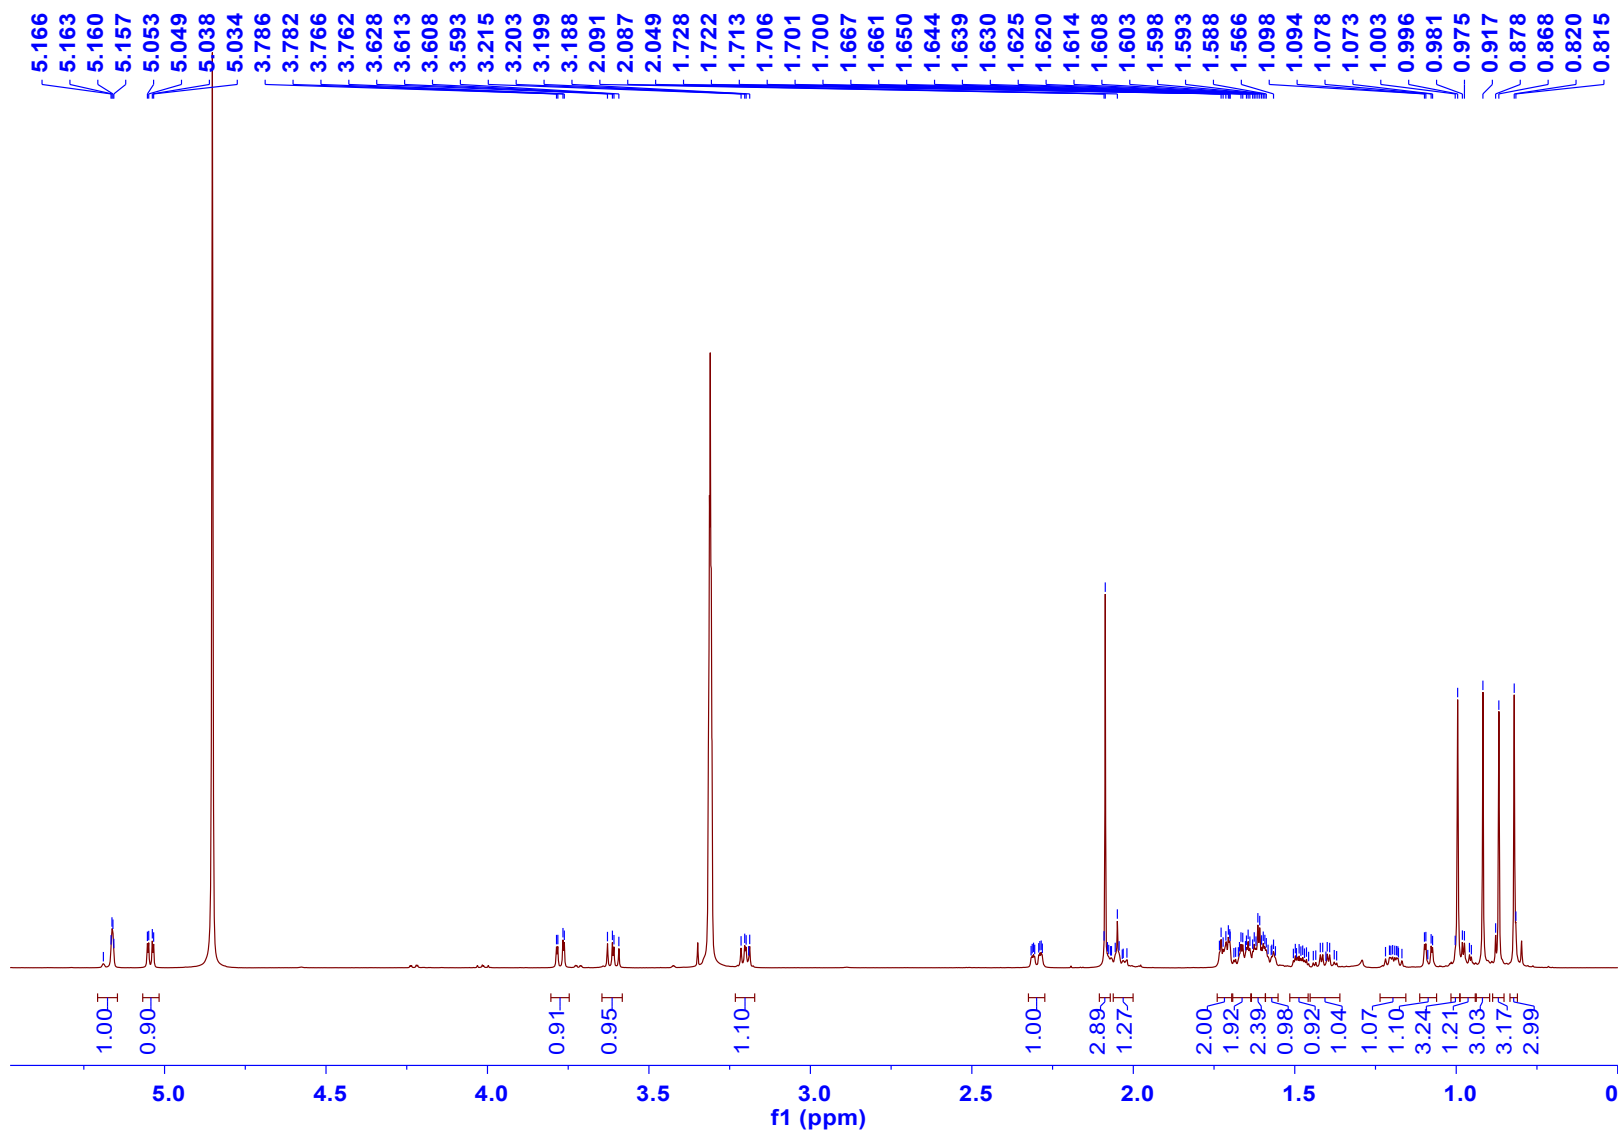

Figure S84.  $^{13}\text{C}$  NMR (150 MHz,  $\text{CD}_3\text{OD}$ ) spectrum of compound 10.

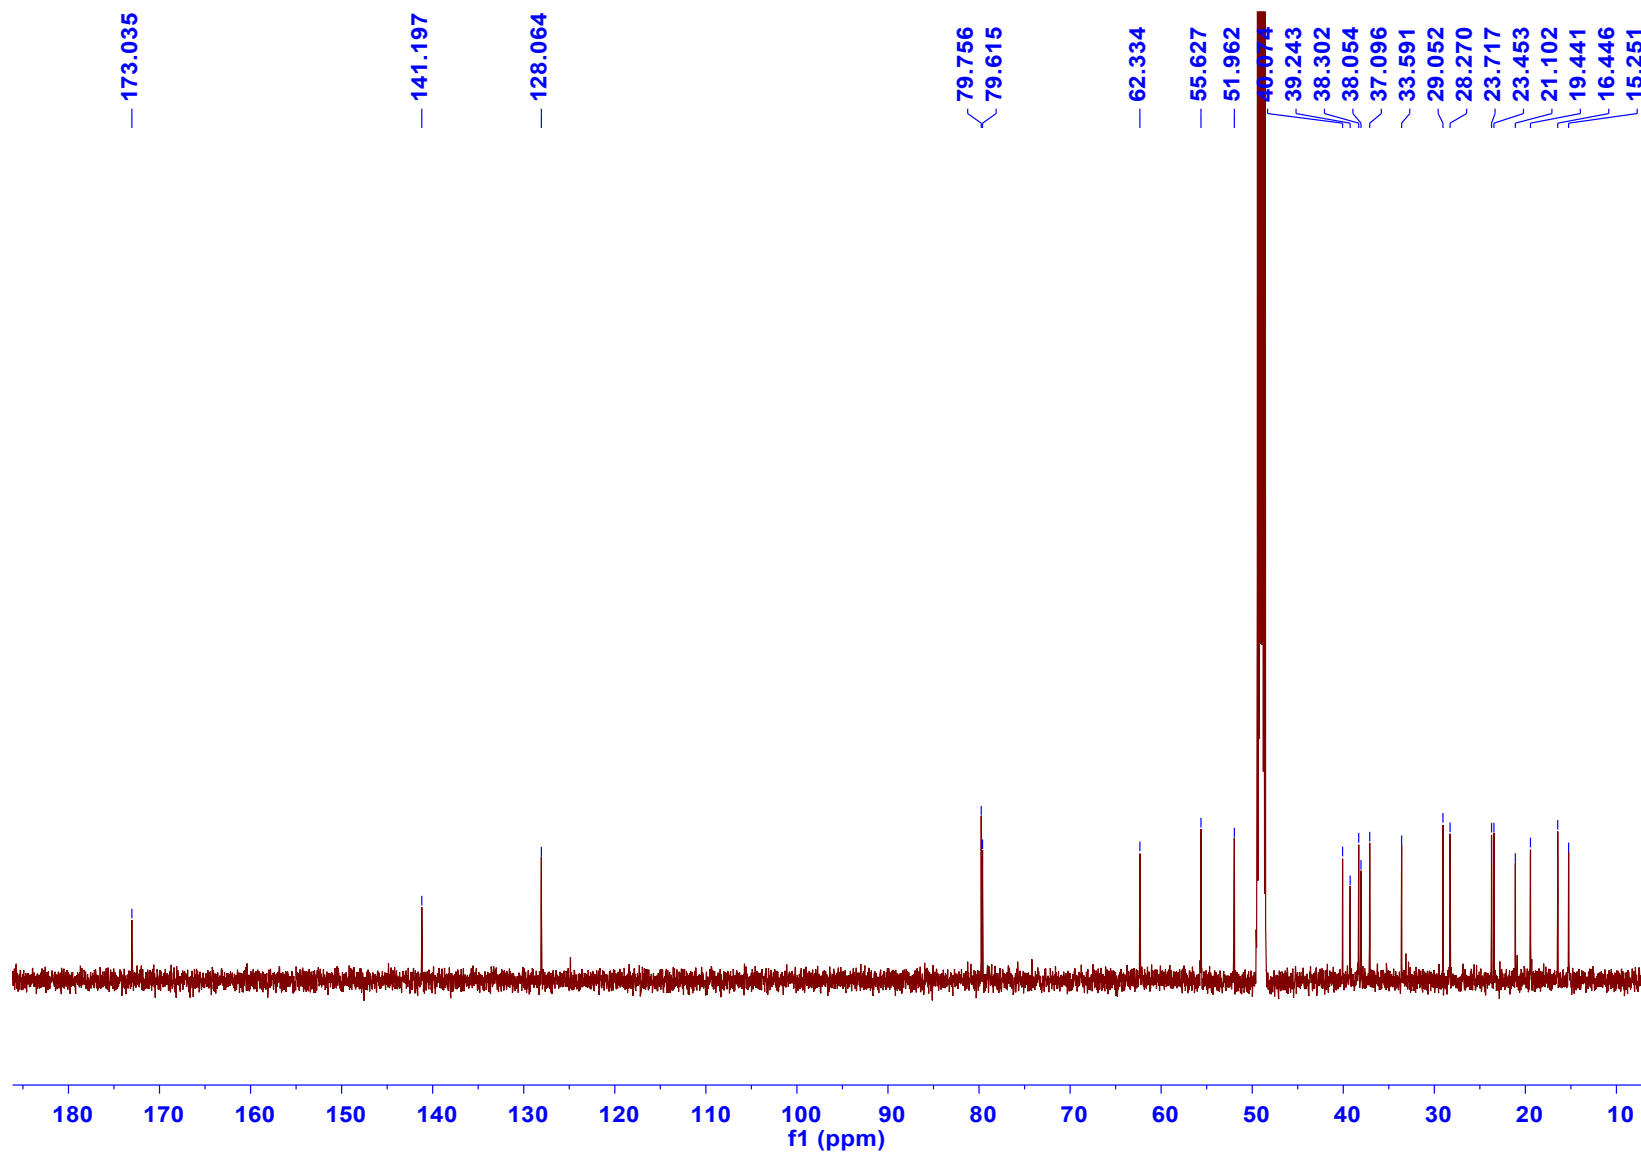

Figure S85.  $^1\text{H}$  NMR (600 MHz,  $\text{CD}_3\text{OD}$ ) spectrum of compound 11.

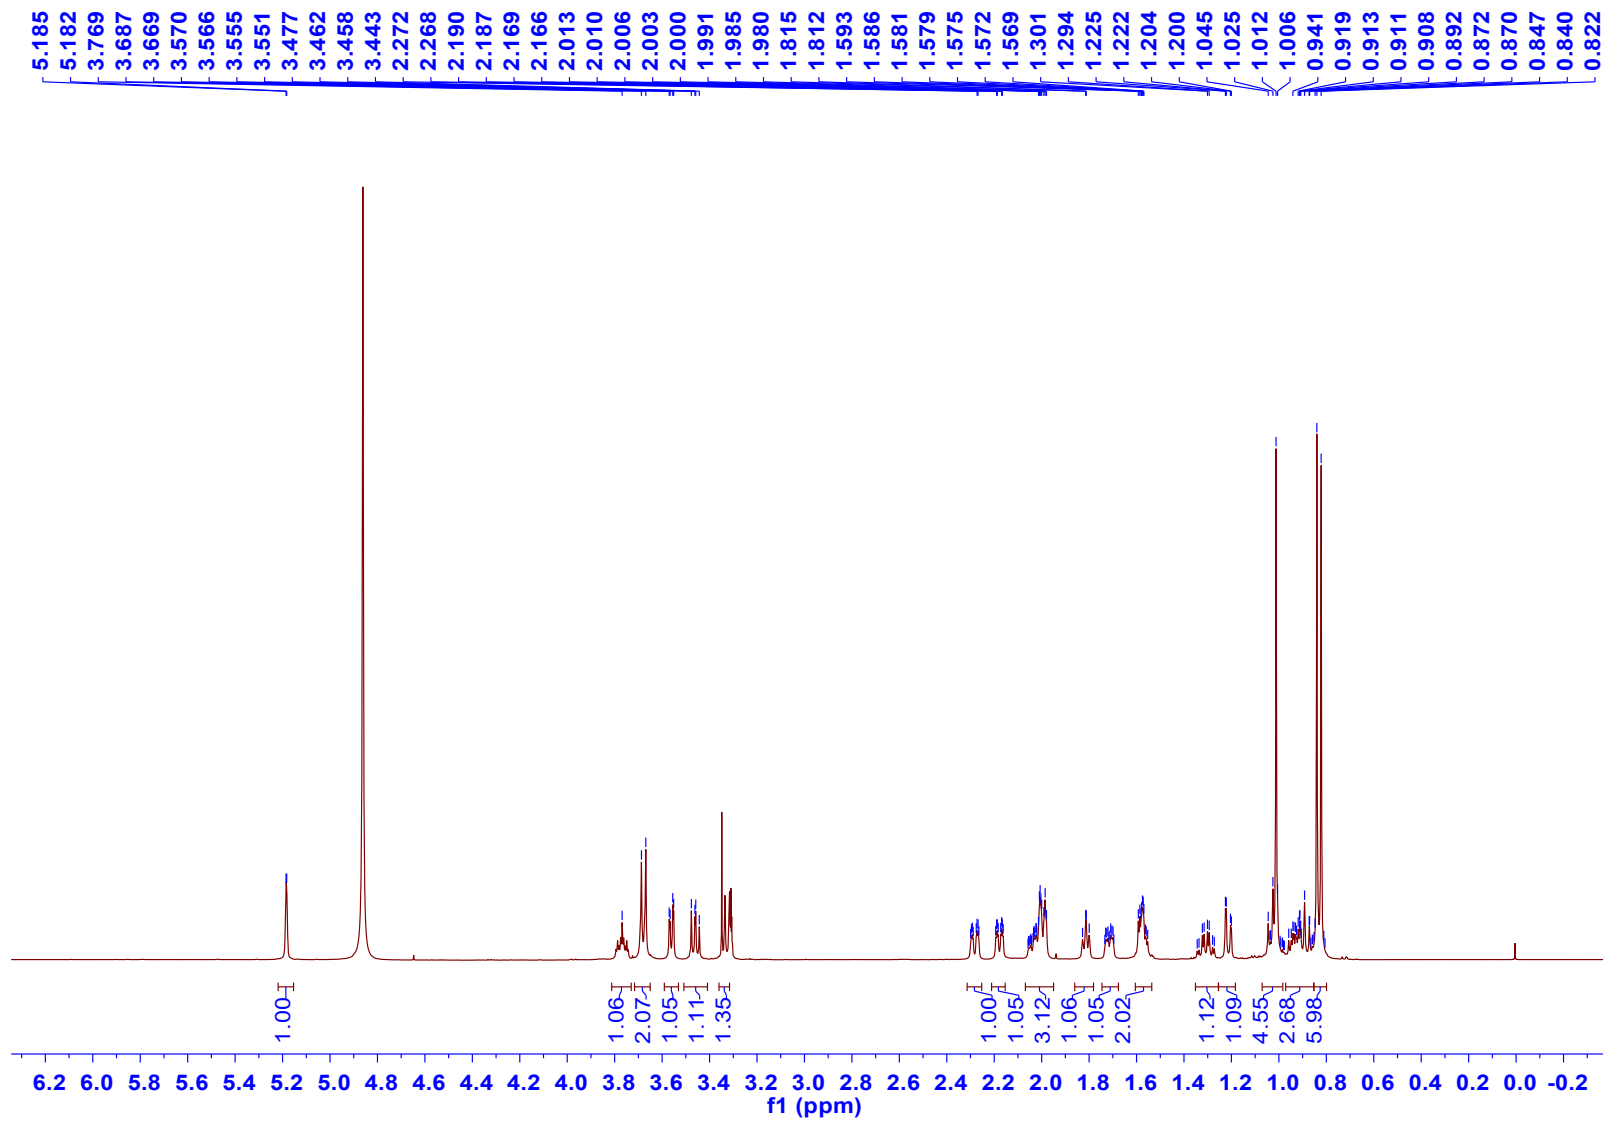

Figure S86.  $^{13}\text{C}$  NMR (150 MHz,  $\text{CD}_3\text{OD}$ ) spectrum of compound 11.

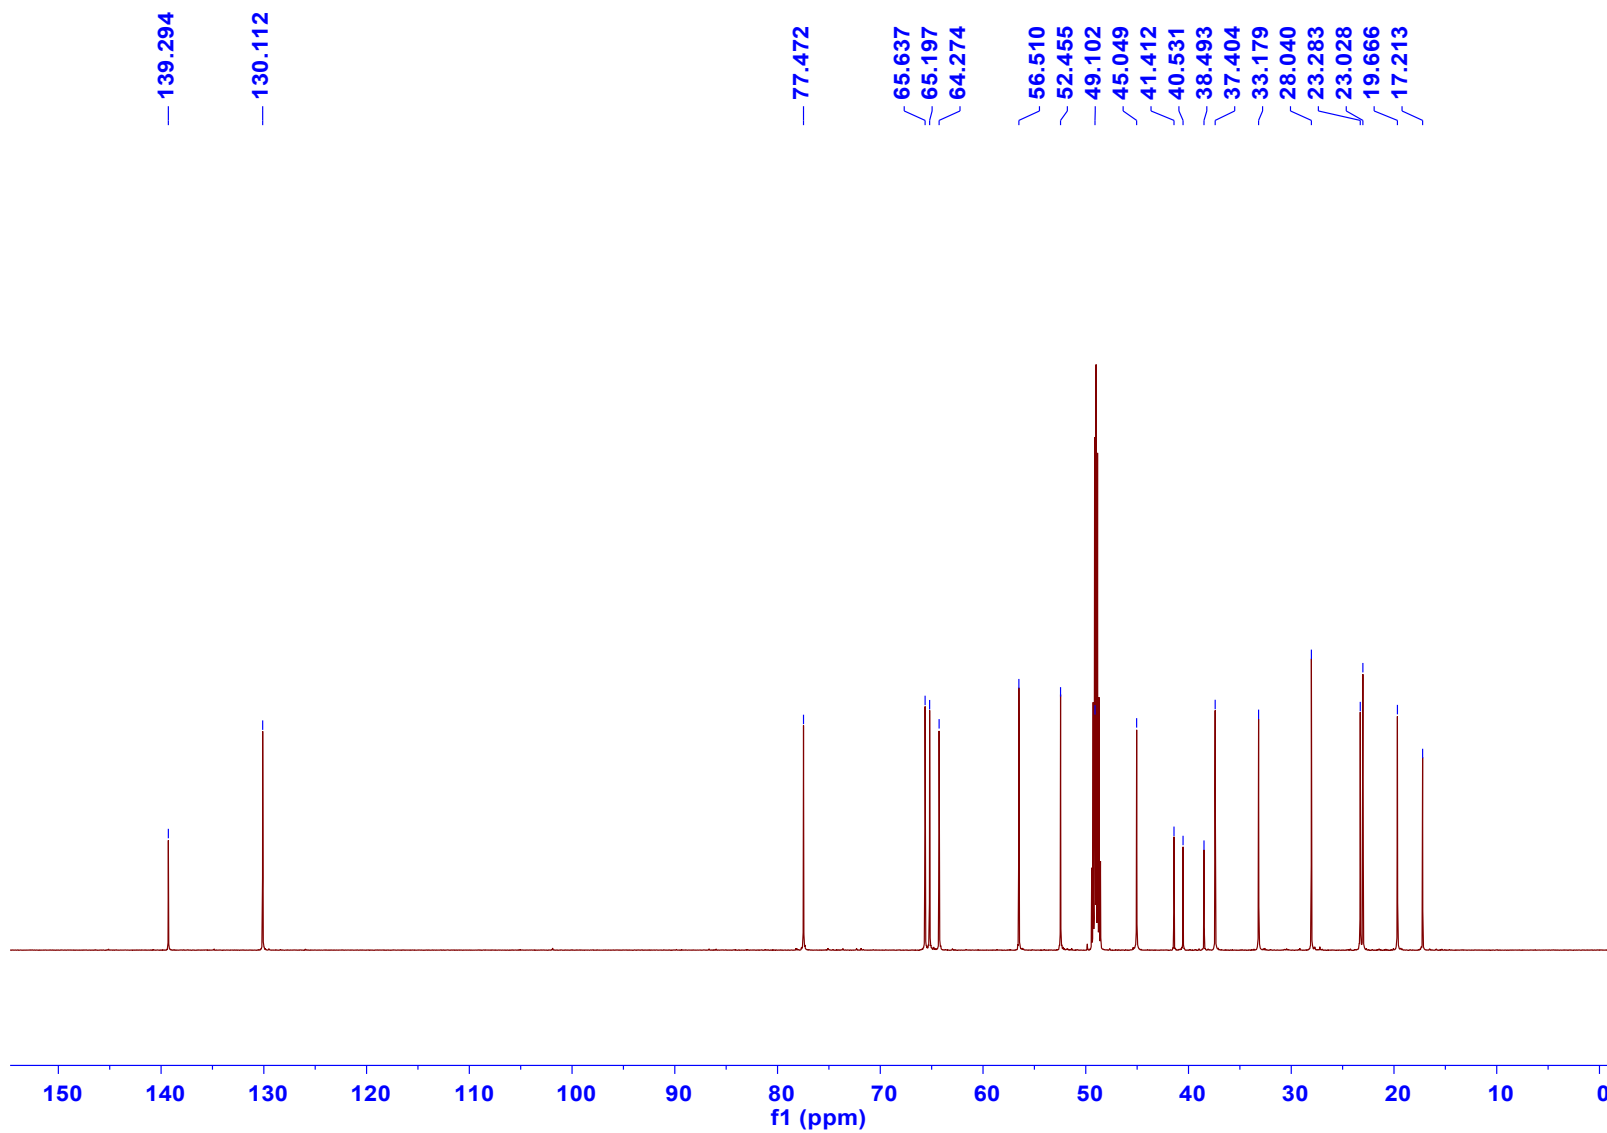

## 2. X-ray Crystallographic Data of Compounds 1, 5 and 8

Crystallographic data for the structures of **1**, **5** and **8** have been deposited with the Cambridge Crystallographic Data Centre (CCDC 2453116 for **1**; CCDC 2453118 for **5**; CCDC 2453134 for **8**). Copies of these data can be obtained free of charge via [www.ccdc.cam.ac.uk](http://www.ccdc.cam.ac.uk) (or from the Cambridge Crystallographic Data Centre, 12 Union Road, Cambridge CB21EZ, U.K.; fax (+44)1223-336-033; or [deposit@ccdc.cam.ac.uk](mailto:deposit@ccdc.cam.ac.uk)).

**Table S1. Crystal data and structure refinement for 1.**

|                                             |                                                               |
|---------------------------------------------|---------------------------------------------------------------|
| Identification code                         | <b>1</b>                                                      |
| Empirical formula                           | C <sub>20</sub> H <sub>32</sub> O <sub>4</sub>                |
| Formula weight                              | 336.45                                                        |
| Temperature/K                               | 169.99(10)                                                    |
| Crystal system                              | monoclinic                                                    |
| Space group                                 | P2 <sub>1</sub>                                               |
| a/Å                                         | 6.84365(12)                                                   |
| b/Å                                         | 11.17471(20)                                                  |
| c/Å                                         | 11.9856(2)                                                    |
| α/°                                         | 90                                                            |
| β/°                                         | 92.9687(16)                                                   |
| γ/°                                         | 90                                                            |
| Volume/Å <sup>3</sup>                       | 915.38(3)                                                     |
| Z                                           | 2                                                             |
| ρ <sub>calc</sub> /g/cm <sup>3</sup>        | 1.221                                                         |
| μ/mm <sup>-1</sup>                          | 0.663                                                         |
| F(000)                                      | 368.0                                                         |
| Crystal size/mm <sup>3</sup>                | 0.15 × 0.12 × 0.1                                             |
| Radiation                                   | Cu Kα (λ = 1.54184)                                           |
| 2θ range for data collection/°              | 7.386 to 148.144                                              |
| Index ranges                                | -8 ≤ h ≤ 8, -13 ≤ k ≤ 13, -14 ≤ l ≤ 9                         |
| Reflections collected                       | 6787                                                          |
| Independent reflections                     | 3579 [R <sub>int</sub> = 0.0210, R <sub>sigma</sub> = 0.0247] |
| Data/restraints/parameters                  | 3579/1/231                                                    |
| Goodness-of-fit on F <sup>2</sup>           | 1.003                                                         |
| Final R indexes [I ≥ 2σ (I)]                | R <sub>1</sub> = 0.0299, wR <sub>2</sub> = 0.0837             |
| Final R indexes [all data]                  | R <sub>1</sub> = 0.0305, wR <sub>2</sub> = 0.0843             |
| Largest diff. peak/hole / e Å <sup>-3</sup> | 0.21/-0.13                                                    |
| Flack/Hooft parameter                       | 0.10(9)/0.12(6)                                               |

**Table S2. Crystal data and structure refinement for 5.**

|                                             |                                                               |
|---------------------------------------------|---------------------------------------------------------------|
| Identification code                         | <b>5</b>                                                      |
| Empirical formula                           | C <sub>20</sub> H <sub>34</sub> O <sub>4</sub>                |
| Formula weight                              | 338.47                                                        |
| Temperature/K                               | 149.99(10)                                                    |
| Crystal system                              | orthorhombic                                                  |
| Space group                                 | P2 <sub>1</sub> 2 <sub>1</sub> 2 <sub>1</sub>                 |
| a/Å                                         | 7.3800(4)                                                     |
| b/Å                                         | 12.1066(4)                                                    |
| c/Å                                         | 20.3919(10)                                                   |
| α/°                                         | 90                                                            |
| β/°                                         | 90                                                            |
| γ/°                                         | 90                                                            |
| Volume/Å <sup>3</sup>                       | 1821.95(15)                                                   |
| Z                                           | 4                                                             |
| ρ <sub>calc</sub> /cm <sup>3</sup>          | 1.234                                                         |
| μ/mm <sup>-1</sup>                          | 0.667                                                         |
| F(000)                                      | 744.0                                                         |
| Crystal size/mm <sup>3</sup>                | 0.14 × 0.12 × 0.11                                            |
| Radiation                                   | Cu Kα (λ = 1.54184)                                           |
| 2θ range for data collection/°              | 8.494 to 148.322                                              |
| Index ranges                                | -7 ≤ h ≤ 9, -14 ≤ k ≤ 14, -25 ≤ l ≤ 25                        |
| Reflections collected                       | 20517                                                         |
| Independent reflections                     | 3654 [R <sub>int</sub> = 0.1125, R <sub>sigma</sub> = 0.0672] |
| Data/restraints/parameters                  | 3654/255/225                                                  |
| Goodness-of-fit on F <sup>2</sup>           | 1.036                                                         |
| Final R indexes [I >= 2σ (I)]               | R <sub>1</sub> = 0.0765, wR <sub>2</sub> = 0.2042             |
| Final R indexes [all data]                  | R <sub>1</sub> = 0.0822, wR <sub>2</sub> = 0.2114             |
| Largest diff. peak/hole / e Å <sup>-3</sup> | 0.46/-0.41                                                    |
| Flack/Hooft parameter                       | 0.03(17)/0.09(15)                                             |

**Table S3. Crystal data and structure refinement for 8.**

|                                             |                                                               |
|---------------------------------------------|---------------------------------------------------------------|
| Identification code                         | <b>8</b>                                                      |
| Empirical formula                           | C <sub>20</sub> H <sub>34</sub> O <sub>3</sub>                |
| Formula weight                              | 322.47                                                        |
| Temperature/K                               | 170.00(10)                                                    |
| Crystal system                              | monoclinic                                                    |
| Space group                                 | P2 <sub>1</sub>                                               |
| a/Å                                         | 11.2450(3)                                                    |
| b/Å                                         | 7.2402(2)                                                     |
| c/Å                                         | 11.5790(3)                                                    |
| α/°                                         | 90                                                            |
| β/°                                         | 99.615(3)                                                     |
| γ/°                                         | 90                                                            |
| Volume/Å <sup>3</sup>                       | 929.48(5)                                                     |
| Z                                           | 2                                                             |
| ρ <sub>calc</sub> /g/cm <sup>3</sup>        | 1.152                                                         |
| μ/mm <sup>-1</sup>                          | 0.588                                                         |
| F(000)                                      | 356.0                                                         |
| Crystal size/mm <sup>3</sup>                | 0.14 × 0.12 × 0.11                                            |
| Radiation                                   | Cu Kα (λ = 1.54184)                                           |
| 2θ range for data collection/°              | 7.744 to 147.56                                               |
| Index ranges                                | -13 ≤ h ≤ 14, -8 ≤ k ≤ 8, -13 ≤ l ≤ 14                        |
| Reflections collected                       | 7872                                                          |
| Independent reflections                     | 3472 [R <sub>int</sub> = 0.0258, R <sub>sigma</sub> = 0.0273] |
| Data/restraints/parameters                  | 3472/1/220                                                    |
| Goodness-of-fit on F <sup>2</sup>           | 1.064                                                         |
| Final R indexes [I ≥ 2σ (I)]                | R <sub>1</sub> = 0.0338, wR <sub>2</sub> = 0.0849             |
| Final R indexes [all data]                  | R <sub>1</sub> = 0.0346, wR <sub>2</sub> = 0.0859             |
| Largest diff. peak/hole / e Å <sup>-3</sup> | 0.14/-0.18                                                    |
| Flack/Hooft parameter                       | -0.01(10)/0.03(9)                                             |

### 3. *In silico* prediction ECD spectrum.

All calculations were performed using Gaussian 16.1. Conformation search using molecular mechanics calculations was performed in DS (Discovery Studio) 2018 with MMFF94s force field with 20 kcal mol<sup>-1</sup> upper energy limit at best level. The conformers performed with the DS 2018 software package were further optimized by using the TDDFT method at the B3LYP/6-31G(d, p) level, and the frequency was calculated at the same level of theory. For all optimized structures, vibrational spectra were calculated to ensure that no imaginary frequencies for energy minimum were obtained. The average values were obtained by the Boltzmann distributions, using the relative Gibbs free energies as weighting factors. The stable conformers were subjected to ECD calculation by the TDDFT method at the B3LYP/6-311G+(d,p) level with the CPCM model in MeOH. ECD spectra of different conformers were simulated using SpecDis 1.71 with a half-bandwidth of 0.3 eV, and the final calculated ECD spectra were obtained according to the Boltzmann-calculated contribution of each con-former. The calculated ECD spectra were compared with the experimental data. Additional details are provided in Supporting Information (pages 86-117).

#### Reference

- (1) M. J. Frisch, G. W. Trucks, H. B. Schlegel, G. E. Scuseria, M. A. Robb, J. R. Cheeseman, G. Scalmani, V. Barone, G. A. Petersson, H. Nakatsuji, X. Li, M. Caricato, A. V. Marenich, J. Bloino, B. G. Janesko, R. Gomperts, B. Mennucci, H. P. Hratchian, J. V. Ortiz, A. F. Izmaylov, J. L. Sonnenberg, D. Williams-Young, F. Ding, F. Lipparini, F. Egidi, J. Goings, B. Peng, A. Petrone, T. Henderson, D. Ranasinghe, V. G. Zakrzewski, J. Gao, N. Rega, G. Zheng, W. Liang, M. Hada, M. Ehara, K. Toyota, R. Fukuda, J. Hasegawa, M. Ishida, T. Nakajima, Y. Honda, O. Kitao, H. Nakai, T. Vreven, K. Throssell, J. A. Montgomery, J. E. Peralta, F. Ogliaro, M. J. Bearpark, J. J. Heyd, E. N. Brothers, K. N. Kudin, V. N. Staroverov, T. A. Keith, R. Kobayashi, J. Normand, K. Raghavachari, A. P. Rendell, J. C. Burant, S. S. Iyengar, J. Tomasi, M. Cossi, J. M. Millam, M. Klene, C. Adamo, R. Cammi, J. W. Ochterski, R. L. Martin, K. Morokuma, O. Farkas, J. B. Foresman and D. J. Fox, Gaussian 16, Revision A. 03, Gaussian. Inc., Wallingford CT, 2016, 3.
- (2) T. Bruhn, A. Schaumlöffel, Y. Hemberger and G. Pescitelli, *SpecDis version 1.71*, Berlin, Germany, 2017, <http://specdis-software.jimdo.com>

**Table S4. Cartesian coordinates and equilibrium populations of low-energy conformers (>1%) of 1 in MeOH.**

| <b>Conformer 1 P (%) = 31.34%</b> |           |           |           | <b>Conformer 2 P (%) = 20.80%</b> |           |           |           |
|-----------------------------------|-----------|-----------|-----------|-----------------------------------|-----------|-----------|-----------|
| C                                 | -3.331152 | -1.824941 | 0.14774   | C                                 | -3.32696  | 1.836376  | -0.111861 |
| C                                 | -3.859131 | -0.686768 | -0.720142 | C                                 | -3.869995 | 0.685693  | 0.729816  |
| C                                 | -3.342022 | 0.69789   | -0.270478 | C                                 | -3.340659 | -0.698614 | 0.26629   |
| C                                 | -1.778889 | 0.631948  | -0.206159 | C                                 | -1.777849 | -0.633217 | 0.205546  |
| C                                 | -1.131257 | -0.577966 | 0.55179   | C                                 | -1.129332 | 0.583518  | -0.538286 |
| C                                 | -1.805363 | -1.884295 | 0.086687  | C                                 | -1.800548 | 1.884415  | -0.054251 |
| C                                 | -1.144339 | 1.95467   | 0.249117  | C                                 | -1.141306 | -1.953238 | -0.256197 |
| C                                 | 0.351705  | 1.885303  | 0.260895  | C                                 | 0.354599  | -1.883822 | -0.266905 |
| C                                 | 1.040317  | 0.732571  | 0.231375  | C                                 | 1.041959  | -0.730825 | -0.228793 |
| C                                 | 0.364865  | -0.573074 | 0.209264  | C                                 | 0.367491  | 0.574641  | -0.197852 |
| C                                 | 2.540982  | 0.74976   | 0.190844  | C                                 | 2.542773  | -0.745175 | -0.189887 |
| C                                 | 3.162943  | -0.355325 | -0.67968  | C                                 | 3.169502  | 0.348016  | 0.691811  |
| C                                 | 2.557137  | -1.717104 | -0.27882  | C                                 | 2.560115  | 1.713266  | 0.303936  |
| C                                 | 1.072185  | -1.687887 | -0.047763 | C                                 | 1.076414  | 1.686342  | 0.067127  |
| O                                 | 3.092143  | 0.492574  | 1.49085   | O                                 | 3.092748  | -0.492424 | -1.490267 |
| C                                 | 4.458084  | 0.116145  | 1.297725  | C                                 | 4.444453  | -0.05498  | -1.311816 |
| C                                 | 4.626273  | -0.295192 | -0.181277 | C                                 | 4.631736  | 0.292888  | 0.18723   |
| O                                 | 5.400234  | 0.722342  | -0.812699 | O                                 | 5.446285  | -0.653898 | 0.869137  |
| O                                 | -5.287339 | -0.64686  | -0.726225 | O                                 | -5.295645 | 0.726077  | 0.814213  |
| C                                 | -4.024951 | 1.122996  | 1.044216  | C                                 | -4.021184 | -1.110086 | -1.054678 |
| C                                 | -3.752975 | 1.718215  | -1.354745 | C                                 | -3.756708 | -1.730974 | 1.335195  |
| C                                 | -1.216596 | -0.47326  | 2.093666  | C                                 | -1.219596 | 0.493531  | -2.080377 |
| C                                 | 2.99106   | -0.095092 | -2.173742 | C                                 | 3.005712  | 0.079608  | 2.184564  |
| H                                 | 2.889741  | 1.731053  | -0.166428 | H                                 | 2.875229  | -1.740119 | 0.16142   |
| H                                 | -1.461989 | 0.489895  | -1.251128 | H                                 | -1.466924 | -0.499654 | 1.253318  |
| H                                 | -3.748192 | -2.776877 | -0.211503 | H                                 | -3.748811 | 2.774473  | 0.266263  |
| H                                 | -3.688202 | -1.699484 | 1.175705  | H                                 | -3.671326 | 1.735515  | -1.150467 |
| H                                 | -3.492435 | -0.850312 | -1.74978  | H                                 | -3.536394 | 0.83444   | 1.765246  |
| H                                 | -1.503232 | -2.087526 | -0.949666 | H                                 | -1.497391 | 2.071814  | 0.984489  |
| H                                 | -1.444678 | -2.725662 | 0.689362  | H                                 | -1.437576 | 2.73353   | -0.644715 |
| H                                 | -1.502452 | 2.232979  | 1.250703  | H                                 | -1.496504 | -2.226525 | -1.260431 |
| H                                 | -1.460791 | 2.770979  | -0.410344 | H                                 | -1.45897  | -2.77308  | 0.39837   |
| H                                 | 0.898173  | 2.826666  | 0.292148  | H                                 | 0.900551  | -2.825408 | -0.305063 |
| H                                 | 2.802047  | -2.459786 | -1.050813 | H                                 | 2.80058   | 2.443124  | 1.088705  |
| H                                 | 3.037981  | -2.082519 | 0.640803  | H                                 | 3.042475  | 2.096157  | -0.60776  |
| H                                 | 0.57924   | -2.655388 | -0.047857 | H                                 | 0.584349  | 2.654165  | 0.075012  |
| H                                 | 4.685143  | -0.697194 | 1.994151  | H                                 | 4.614667  | 0.79993   | -1.975017 |

|   |           |           |           |   |           |           |           |
|---|-----------|-----------|-----------|---|-----------|-----------|-----------|
| H | 5.130949  | 0.958751  | 1.502661  | H | 5.151406  | -0.849706 | -1.58956  |
| H | 5.126483  | -1.269773 | -0.286244 | H | 5.144321  | 1.248424  | 0.329765  |
| H | 5.510277  | 0.471653  | -1.742862 | H | 5.054212  | -1.532666 | 0.739934  |
| H | -5.598278 | -1.517082 | -1.018176 | H | -5.635284 | 0.751496  | -0.093929 |
| H | -5.102044 | 1.207823  | 0.882138  | H | -3.921215 | -0.365629 | -1.848293 |
| H | -3.873249 | 0.41237   | 1.858311  | H | -3.616075 | -2.050901 | -1.43739  |
| H | -3.657226 | 2.097097  | 1.380506  | H | -5.090356 | -1.27407  | -0.881225 |
| H | -3.539984 | 2.746822  | -1.04721  | H | -3.210481 | -1.571228 | 2.272736  |
| H | -3.223016 | 1.529669  | -2.296591 | H | -4.824927 | -1.628231 | 1.545241  |
| H | -4.826117 | 1.639627  | -1.546952 | H | -3.572633 | -2.759194 | 1.00737   |
| H | -0.672126 | -1.313176 | 2.537601  | H | -0.683019 | 1.341078  | -2.519277 |
| H | -0.752232 | 0.444811  | 2.462249  | H | -0.750931 | -0.418311 | -2.459416 |
| H | -2.244164 | -0.506826 | 2.459499  | H | -2.248909 | 0.523641  | -2.442627 |
| H | 3.535316  | -0.836763 | -2.772855 | H | 1.948015  | 0.131851  | 2.463603  |
| H | 1.933719  | -0.16108  | -2.449579 | H | 3.386421  | -0.907821 | 2.460287  |
| H | 3.347776  | 0.90324   | -2.44633  | H | 3.554701  | 0.82068   | 2.775075  |

| <b>Conformer 3 P (%) = 18.95%</b> |           |           |           | <b>Conformer 4 P (%) = 15.31%</b> |           |           |           |
|-----------------------------------|-----------|-----------|-----------|-----------------------------------|-----------|-----------|-----------|
| C                                 | -3.334354 | 1.829848  | -0.14841  | C                                 | -3.330137 | -1.825795 | 0.139719  |
| C                                 | -3.858993 | 0.697406  | 0.71961   | C                                 | -3.859326 | -0.682493 | -0.720641 |
| C                                 | -3.341852 | -0.695141 | 0.262834  | C                                 | -3.341417 | 0.699556  | -0.263792 |
| C                                 | -1.7786   | -0.63557  | 0.199802  | C                                 | -1.778245 | 0.63296   | -0.202006 |
| C                                 | -1.131263 | 0.581349  | -0.549819 | C                                 | -1.129479 | -0.581804 | 0.547399  |
| C                                 | -1.80893  | 1.885372  | -0.083894 | C                                 | -1.804494 | -1.885159 | 0.075415  |
| C                                 | -1.144432 | -1.953347 | -0.273072 | C                                 | -1.143341 | 1.952702  | 0.261484  |
| C                                 | 0.351937  | -1.883579 | -0.285077 | C                                 | 0.352595  | 1.883261  | 0.270598  |
| C                                 | 1.040043  | -0.731119 | -0.239686 | C                                 | 1.040325  | 0.730446  | 0.2304    |
| C                                 | 0.363705  | 0.573557  | -0.203019 | C                                 | 0.365695  | -0.575121 | 0.201253  |
| C                                 | 2.540764  | -0.748493 | -0.196863 | C                                 | 2.540901  | 0.744524  | 0.187736  |
| C                                 | 3.160983  | 0.348033  | 0.685699  | C                                 | 3.16521   | -0.349506 | -0.694784 |
| C                                 | 2.554602  | 1.71351   | 0.298666  | C                                 | 2.556852  | -1.714475 | -0.30402  |
| C                                 | 1.069743  | 1.686013  | 0.067091  | C                                 | 1.073506  | -1.687226 | -0.064651 |
| O                                 | 3.093279  | -0.478433 | -1.493473 | O                                 | 3.094768  | 0.492269  | 1.486806  |
| C                                 | 4.458652  | -0.102313 | -1.29511  | C                                 | 4.446205  | 0.056399  | 1.304461  |
| C                                 | 4.624928  | 0.293791  | 0.188161  | C                                 | 4.628854  | -0.294045 | -0.194553 |
| O                                 | 5.398698  | -0.729862 | 0.809945  | O                                 | 5.441817  | 0.65153   | -0.880478 |
| O                                 | -5.283267 | 0.794248  | 0.718357  | O                                 | -5.287424 | -0.642035 | -0.723988 |
| C                                 | -4.021708 | -1.114917 | -1.052865 | C                                 | -4.022333 | 1.117244  | 1.054278  |
| C                                 | -3.748282 | -1.723078 | 1.341389  | C                                 | -3.753585 | 1.725921  | -1.341854 |
| C                                 | -1.208841 | 0.489069  | -2.093597 | C                                 | -1.212048 | -0.486787 | 2.090021  |
| C                                 | 2.987969  | 0.072277  | 2.176836  | C                                 | 2.99714   | -0.082429 | -2.187288 |
| H                                 | 2.889122  | -1.733285 | 0.151154  | H                                 | 2.872914  | 1.739139  | -0.164955 |

|   |           |           |           |   |           |           |           |
|---|-----------|-----------|-----------|---|-----------|-----------|-----------|
| H | -1.458585 | -0.503475 | 1.245445  | H | -1.462598 | 0.497888  | -1.248193 |
| H | -3.763002 | 2.771249  | 0.21241   | H | -3.747876 | -2.775487 | -0.224406 |
| H | -3.688622 | 1.701374  | -1.177277 | H | -3.68541  | -1.706362 | 1.169015  |
| H | -3.482395 | 0.861402  | 1.745217  | H | -3.49431  | -0.840044 | -1.751763 |
| H | -1.50903  | 2.089183  | 0.952975  | H | -1.504345 | -2.081991 | -0.962691 |
| H | -1.44635  | 2.726656  | -0.685697 | H | -1.442771 | -2.730242 | 0.672229  |
| H | -1.506279 | -2.21831  | -1.277001 | H | -1.499949 | 2.223976  | 1.265489  |
| H | -1.455966 | -2.780085 | 0.375802  | H | -1.46057  | 2.773492  | -0.391947 |
| H | 0.89834   | -2.824498 | -0.32772  | H | 0.898662  | 2.824827  | 0.308347  |
| H | 2.799262  | 2.448611  | 1.077903  | H | 2.796536  | -2.445235 | -1.088235 |
| H | 3.034991  | 2.088339  | -0.617428 | H | 3.04106   | -2.095594 | 0.607456  |
| H | 0.575687  | 2.652823  | 0.077245  | H | 0.581088  | -2.654968 | -0.069651 |
| H | 4.685296  | 0.718466  | -1.982848 | H | 4.619968  | -0.797016 | 1.968666  |
| H | 5.132601  | -0.941996 | -1.50823  | H | 5.153243  | 0.852527  | 1.578167  |
| H | 5.124514  | 1.267451  | 0.303678  | H | 5.140874  | -1.249885 | -0.337118 |
| H | 5.509561  | -0.48757  | 1.742234  | H | 5.051222  | 1.530728  | -0.749787 |
| H | -5.623818 | 0.178953  | 1.384683  | H | -5.599377 | -1.509479 | -1.023034 |
| H | -3.729209 | -2.128796 | -1.343033 | H | -3.656352 | 2.090818  | 1.394106  |
| H | -5.106919 | -1.100225 | -0.921396 | H | -5.099927 | 1.200223  | 0.894823  |
| H | -3.788881 | -0.450997 | -1.885835 | H | -3.867234 | 0.403427  | 1.864928  |
| H | -3.293089 | -1.48682  | 2.311046  | H | -4.827117 | 1.649108  | -1.532472 |
| H | -4.837335 | -1.744548 | 1.471746  | H | -3.539419 | 2.752826  | -1.029404 |
| H | -3.453943 | -2.740741 | 1.069514  | H | -3.225619 | 1.541879  | -2.285686 |
| H | -2.232337 | 0.556901  | -2.466165 | H | -0.74787  | 0.429245  | 2.463988  |
| H | -0.639632 | 1.31862   | -2.525478 | H | -2.23896  | -0.523377 | 2.457292  |
| H | -0.766851 | -0.436983 | -2.469421 | H | -0.666497 | -1.329256 | 2.52773   |
| H | 3.531053  | 0.808233  | 2.783969  | H | 3.544172  | -0.824294 | -2.778656 |
| H | 1.93034   | 0.134904  | 2.452369  | H | 1.938565  | -0.134605 | -2.462926 |
| H | 3.34538   | -0.928475 | 2.439442  | H | 3.377347  | 0.904586  | -2.46508  |

| <b>Conformer 5 P (%) = 13.60%</b> |           |           |           |
|-----------------------------------|-----------|-----------|-----------|
| C                                 | -3.325072 | 1.836222  | -0.104197 |
| C                                 | -3.86961  | 0.680577  | 0.729615  |
| C                                 | -3.339076 | -0.700913 | 0.259545  |
| C                                 | -1.776015 | -0.635149 | 0.201884  |
| C                                 | -1.126275 | 0.586187  | -0.53346  |
| C                                 | -1.798798 | 1.883982  | -0.043226 |
| C                                 | -1.138242 | -1.952087 | -0.266724 |
| C                                 | 0.357795  | -1.882354 | -0.274263 |
| C                                 | 1.045619  | -0.729791 | -0.229585 |
| C                                 | 0.370002  | 0.574865  | -0.190585 |
| C                                 | 2.546157  | -0.748728 | -0.188168 |

|   |           |           |           |
|---|-----------|-----------|-----------|
| C | 3.169194  | 0.342951  | 0.699336  |
| C | 2.560284  | 1.712807  | 0.325605  |
| C | 1.076997  | 1.685006  | 0.085755  |
| O | 3.0938    | -0.47925  | -1.492134 |
| C | 4.430855  | -0.013044 | -1.312202 |
| C | 4.622003  | 0.290892  | 0.193899  |
| O | 5.297018  | -0.765685 | 0.872632  |
| O | -5.295848 | 0.720636  | 0.810866  |
| C | -4.017068 | -1.105164 | -1.064977 |
| C | -3.756757 | -1.739346 | 1.321915  |
| C | -1.21356  | 0.50518   | -2.076258 |
| C | 3.002622  | 0.059005  | 2.190011  |
| H | 2.893063  | -1.7345   | 0.153948  |
| H | -1.466878 | -0.507835 | 1.250928  |
| H | -3.747995 | 2.771996  | 0.278575  |
| H | -3.667373 | 1.741354  | -1.14404  |
| H | -3.538648 | 0.823598  | 1.766671  |
| H | -1.497886 | 2.065161  | 0.997257  |
| H | -1.434658 | 2.736732  | -0.627768 |
| H | -1.491871 | -2.218864 | -1.273346 |
| H | -1.457244 | -2.776012 | 0.38207   |
| H | 0.904471  | -2.823179 | -0.314921 |
| H | 2.796494  | 2.434208  | 1.119548  |
| H | 3.042446  | 2.109283  | -0.580301 |
| H | 0.583997  | 2.652273  | 0.101687  |
| H | 4.574528  | 0.873328  | -1.941768 |
| H | 5.151846  | -0.780947 | -1.631443 |
| H | 5.14667   | 1.244421  | 0.357538  |
| H | 6.16578   | -0.876229 | 0.457631  |
| H | -5.632879 | 0.746611  | -0.098214 |
| H | -5.086474 | -1.271119 | -0.894609 |
| H | -3.916031 | -0.355887 | -1.853894 |
| H | -3.610231 | -2.043242 | -1.452361 |
| H | -3.212166 | -1.584606 | 2.261201  |
| H | -4.825433 | -1.638386 | 1.530662  |
| H | -3.571313 | -2.765522 | 0.988672  |
| H | -2.242111 | 0.536931  | -2.440699 |
| H | -0.676398 | 1.355584  | -2.508927 |
| H | -0.743303 | -0.404131 | -2.459217 |
| H | 3.387537  | -0.929941 | 2.44812   |
| H | 3.543177  | 0.799051  | 2.790427  |
| H | 1.942795  | 0.10768   | 2.462159  |

**Table S5. Cartesian coordinates and equilibrium populations of low-energy conformers (>1%) of 2 in MeOH.**

| Conformer 1 P (%) = 57.00% |        |        |        | Conformer 2 P (%) =42.98% |        |        |        |
|----------------------------|--------|--------|--------|---------------------------|--------|--------|--------|
| C                          | -3.927 | -1.621 | 0.169  | C                         | -3.648 | -1.786 | 0.049  |
| C                          | -4.545 | -0.313 | -0.356 | C                         | -4.346 | -0.544 | -0.526 |
| C                          | -3.904 | 0.965  | 0.264  | C                         | -3.87  | 0.792  | 0.127  |
| C                          | -2.346 | 0.857  | 0.118  | C                         | -2.299 | 0.825  | 0.116  |
| C                          | -1.675 | -0.465 | 0.617  | C                         | -1.544 | -0.441 | 0.641  |
| C                          | -2.409 | -1.656 | -0.046 | C                         | -2.125 | -1.683 | -0.077 |
| C                          | -1.557 | 2.074  | 0.632  | C                         | -1.673 | 2.091  | 0.728  |
| C                          | -0.129 | 2.046  | 0.084  | C                         | -0.203 | 2.215  | 0.316  |
| C                          | 0.517  | 0.674  | 0.045  | C                         | 0.561  | 0.907  | 0.228  |
| C                          | -0.185 | -0.47  | 0.249  | C                         | -0.044 | -0.302 | 0.354  |
| C                          | 2.008  | 0.663  | -0.248 | C                         | 2.053  | 1.039  | -0.028 |
| C                          | 2.68   | -0.693 | -0.526 | C                         | 2.858  | -0.244 | -0.305 |
| C                          | 2.023  | -1.759 | 0.366  | C                         | 2.263  | -1.391 | 0.527  |
| C                          | 0.509  | -1.815 | 0.128  | C                         | 0.774  | -1.576 | 0.221  |
| O                          | 2.728  | 1.133  | 0.866  | O                         | 2.711  | 1.582  | 1.089  |
| C                          | 4.097  | 0.889  | 0.679  | C                         | 4.098  | 1.475  | 0.906  |
| C                          | 4.137  | -0.469 | -0.033 | C                         | 4.266  | 0.09   | 0.279  |
| O                          | 5.06   | -0.434 | -1.128 | O                         | 5.291  | 0.146  | -0.719 |
| O                          | -5.946 | -0.339 | -0.126 | O                         | -5.746 | -0.746 | -0.385 |
| C                          | -4.359 | 1.181  | 1.729  | C                         | -4.389 | 1.97   | -0.738 |
| C                          | -4.399 | 2.187  | -0.55  | C                         | -4.462 | 0.973  | 1.546  |
| C                          | -1.696 | -0.637 | 2.157  | C                         | -1.634 | -0.641 | 2.174  |
| C                          | 2.588  | -1.047 | -2.018 | C                         | 2.818  | -0.533 | -1.815 |
| H                          | 2.213  | 1.348  | -1.061 | H                         | 2.201  | 1.745  | -0.836 |
| H                          | -2.188 | 0.856  | -0.963 | H                         | -2.052 | 0.871  | -0.948 |
| C                          | 6.364  | -0.317 | -0.834 | C                         | 5.788  | -1.02  | -1.163 |
| O                          | 6.796  | -0.258 | 0.296  | O                         | 5.445  | -2.101 | -0.739 |
| C                          | 7.343  | -0.261 | -1.978 | C                         | 6.831  | -0.981 | -2.248 |
| H                          | -4.159 | -1.76  | 1.225  | H                         | -3.983 | -2.679 | -0.481 |
| H                          | -4.372 | -2.473 | -0.346 | H                         | -3.926 | -1.937 | 1.093  |
| H                          | -4.404 | -0.286 | -1.438 | H                         | -4.136 | -0.514 | -1.597 |
| H                          | -2.21  | -1.655 | -1.119 | H                         | -1.69  | -2.602 | 0.313  |
| H                          | -2.033 | -2.607 | 0.331  | H                         | -1.865 | -1.649 | -1.137 |
| H                          | -2.017 | 3.013  | 0.331  | H                         | -1.754 | 2.076  | 1.814  |
| H                          | -1.536 | 2.092  | 1.721  | H                         | -2.185 | 2.996  | 0.411  |
| H                          | -0.14  | 2.433  | -0.936 | H                         | -0.159 | 2.687  | -0.667 |
| H                          | 0.493  | 2.732  | 0.658  | H                         | 0.307  | 2.896  | 0.998  |

|   |        |        |        |   |        |        |        |
|---|--------|--------|--------|---|--------|--------|--------|
| H | 2.206  | -1.54  | 1.42   | H | 2.803  | -2.319 | 0.333  |
| H | 2.466  | -2.738 | 0.177  | H | 2.378  | -1.186 | 1.593  |
| H | 0.087  | -2.517 | 0.846  | H | 0.389  | -2.335 | 0.901  |
| H | 0.301  | -2.232 | -0.857 | H | 0.644  | -1.976 | -0.785 |
| H | 4.492  | 1.675  | 0.051  | H | 4.616  | 1.594  | 1.846  |
| H | 4.615  | 0.9    | 1.627  | H | 4.411  | 2.257  | 0.227  |
| H | 4.442  | -1.256 | 0.646  | H | 4.568  | -0.603 | 1.055  |
| H | -6.322 | -1.101 | -0.595 | H | -6.216 | -0.053 | -0.874 |
| H | -5.367 | 1.594  | 1.767  | H | -3.976 | 1.938  | -1.747 |
| H | -3.715 | 1.88   | 2.261  | H | -4.141 | 2.939  | -0.31  |
| H | -4.407 | 0.258  | 2.3    | H | -5.474 | 1.962  | -0.833 |
| H | -5.488 | 2.226  | -0.591 | H | -3.977 | 1.78   | 2.094  |
| H | -4.04  | 2.157  | -1.578 | H | -4.41  | 0.071  | 2.148  |
| H | -4.079 | 3.132  | -0.113 | H | -5.522 | 1.226  | 1.494  |
| H | -1.141 | -1.524 | 2.463  | H | -1.247 | 0.212  | 2.73   |
| H | -2.692 | -0.775 | 2.561  | H | -1.05  | -1.505 | 2.49   |
| H | -1.243 | 0.205  | 2.678  | H | -2.641 | -0.832 | 2.525  |
| H | 3.08   | -0.296 | -2.637 | H | 3.335  | 0.241  | -2.383 |
| H | 1.554  | -1.11  | -2.355 | H | 1.794  | -0.572 | -2.188 |
| H | 3.063  | -2.006 | -2.221 | H | 3.281  | -1.49  | -2.053 |
| H | 8.369  | -0.218 | -1.612 | H | 6.459  | -1.468 | -3.15  |
| H | 7.239  | -1.144 | -2.608 | H | 7.737  | -1.495 | -1.926 |
| H | 7.159  | 0.623  | -2.589 | H | 7.091  | 0.048  | -2.497 |

| <b>Conformer 3 P (%) = 0.02%</b> |        |        |        |
|----------------------------------|--------|--------|--------|
| C                                | -3.921 | -1.609 | 0.202  |
| C                                | -4.525 | -0.322 | -0.382 |
| C                                | -3.887 | 0.98   | 0.201  |
| C                                | -2.324 | 0.857  | 0.111  |
| C                                | -1.67  | -0.457 | 0.655  |
| C                                | -2.402 | -1.659 | 0.009  |
| C                                | -1.543 | 2.078  | 0.632  |
| C                                | -0.095 | 2.038  | 0.137  |
| C                                | 0.54   | 0.661  | 0.109  |
| C                                | -0.175 | -0.477 | 0.308  |
| C                                | 2.034  | 0.638  | -0.167 |
| C                                | 2.67   | -0.712 | -0.522 |
| C                                | 2.033  | -1.792 | 0.371  |
| C                                | 0.509  | -1.83  | 0.198  |
| O                                | 2.746  | 1.009  | 0.987  |
| C                                | 4.112  | 0.728  | 0.817  |
| C                                | 4.15   | -0.512 | -0.09  |

|   |        |        |        |
|---|--------|--------|--------|
| O | 4.994  | -0.28  | -1.228 |
| O | -5.929 | -0.379 | -0.166 |
| C | -4.335 | 2.18   | -0.676 |
| C | -4.384 | 1.258  | 1.641  |
| C | -1.719 | -0.595 | 2.198  |
| C | 2.503  | -1.025 | -2.017 |
| H | 2.27   | 1.368  | -0.931 |
| H | -2.131 | 0.835  | -0.965 |
| C | 6.332  | -0.226 | -1.061 |
| O | 7.074  | -0.046 | -2.001 |
| C | 6.987  | -0.39  | 0.294  |
| H | -4.364 | -2.48  | -0.285 |
| H | -4.167 | -1.705 | 1.26   |
| H | -4.369 | -0.347 | -1.463 |
| H | -2.036 | -2.602 | 0.414  |
| H | -2.187 | -1.685 | -1.06  |
| H | -1.564 | 2.114  | 1.72   |
| H | -1.983 | 3.016  | 0.301  |
| H | -0.065 | 2.434  | -0.878 |
| H | 0.513  | 2.713  | 0.741  |
| H | 2.455  | -2.771 | 0.142  |
| H | 2.264  | -1.602 | 1.421  |
| H | 0.105  | -2.507 | 0.95   |
| H | 0.26   | -2.269 | -0.767 |
| H | 4.573  | 0.573  | 1.781  |
| H | 4.571  | 1.582  | 0.34   |
| H | 4.505  | -1.389 | 0.432  |
| H | -6.354 | 0.34   | -0.659 |
| H | -3.972 | 2.085  | -1.7   |
| H | -3.98  | 3.132  | -0.286 |
| H | -5.419 | 2.272  | -0.724 |
| H | -3.788 | 2.022  | 2.139  |
| H | -4.395 | 0.372  | 2.267  |
| H | -5.412 | 1.621  | 1.632  |
| H | -1.251 | 0.245  | 2.708  |
| H | -1.186 | -1.488 | 2.527  |
| H | -2.722 | -0.703 | 2.592  |
| H | 2.962  | -0.257 | -2.64  |
| H | 1.453  | -1.079 | -2.302 |
| H | 2.966  | -1.978 | -2.27  |
| H | 6.759  | 0.458  | 0.939  |
| H | 8.071  | -0.445 | 0.191  |
| H | 6.659  | -1.307 | 0.783  |

**Table S6. Cartesian coordinates and equilibrium populations of low-energy conformers (>1%) of 3 in MeOH.**

| Conformer 1 P (%) = 99.27% |        |        |        | Conformer 2 P (%) = 0.73% |        |        |        |
|----------------------------|--------|--------|--------|---------------------------|--------|--------|--------|
| C                          | -2.573 | 1.142  | 1.1    | C                         | -2.432 | 1.176  | 1.259  |
| C                          | -2.419 | 2.192  | -0.016 | C                         | -2.401 | 2.149  | 0.069  |
| C                          | -0.945 | 2.614  | -0.251 | C                         | -0.965 | 2.606  | -0.286 |
| C                          | -0.063 | 1.331  | -0.413 | C                         | -0.048 | 1.347  | -0.447 |
| C                          | -0.205 | 0.227  | 0.684  | C                         | -0.081 | 0.278  | 0.697  |
| C                          | -1.711 | -0.1   | 0.837  | C                         | -1.561 | -0.06  | 1.005  |
| C                          | 1.424  | 1.601  | -0.699 | C                         | 1.406  | 1.665  | -0.834 |
| C                          | 2.097  | 0.333  | -1.232 | C                         | 2.107  | 0.408  | -1.355 |
| C                          | 1.651  | -0.959 | -0.573 | C                         | 1.73   | -0.879 | -0.649 |
| C                          | 0.589  | -1.02  | 0.272  | C                         | 0.721  | -0.957 | 0.256  |
| C                          | 2.471  | -2.188 | -0.929 | C                         | 2.553  | -2.1   | -1.021 |
| C                          | 1.953  | -3.566 | -0.471 | C                         | 1.901  | -3.501 | -0.839 |
| C                          | 1.286  | -3.397 | 0.905  | C                         | 0.496  | -3.423 | -0.219 |
| C                          | 0.163  | -2.356 | 0.855  | C                         | 0.407  | -2.321 | 0.844  |
| C                          | 4.397  | -3.355 | -0.479 | C                         | 4.181  | -3.45  | -0.099 |
| C                          | 3.274  | -4.374 | -0.259 | C                         | 2.881  | -4.205 | 0.142  |
| O                          | -3.19  | 3.361  | 0.292  | O                         | -3.204 | 3.303  | 0.352  |
| C                          | -0.46  | 3.555  | 0.878  | C                         | -0.436 | 3.617  | 0.758  |
| C                          | -0.908 | 3.432  | -1.564 | C                         | -1.048 | 3.357  | -1.638 |
| C                          | 0.38   | 0.627  | 2.062  | C                         | 0.61   | 0.728  | 2.007  |
| C                          | 0.972  | -4.12  | -1.52  | C                         | 1.84   | -4.176 | -2.223 |
| H                          | -0.448 | 0.869  | -1.326 | H                         | -0.469 | 0.834  | -1.316 |
| O                          | 3.745  | -2.121 | -0.334 | O                         | 3.71   | -2.133 | -0.215 |
| C                          | -4.528 | 3.278  | 0.224  | C                         | -4.538 | 3.157  | 0.373  |
| C                          | -5.325 | 4.495  | 0.618  | C                         | -5.376 | 4.354  | 0.74   |
| O                          | -5.126 | 2.289  | -0.138 | O                         | -5.108 | 2.121  | 0.111  |
| O                          | 3.434  | -5.455 | -1.164 | O                         | 3.035  | -5.593 | -0.108 |
| H                          | 2.635  | -2.198 | -1.999 | H                         | 2.91   | -1.981 | -2.035 |
| H                          | -2.322 | 1.578  | 2.066  | H                         | -2.113 | 1.683  | 2.169  |
| H                          | -3.613 | 0.83   | 1.181  | H                         | -3.453 | 0.847  | 1.45   |
| H                          | -2.799 | 1.763  | -0.946 | H                         | -2.82  | 1.643  | -0.804 |
| H                          | -2.072 | -0.588 | -0.07  | H                         | -1.989 | -0.625 | 0.176  |
| H                          | -1.876 | -0.809 | 1.648  | H                         | -1.64  | -0.693 | 1.889  |
| H                          | 1.558  | 2.391  | -1.435 | H                         | 1.462  | 2.426  | -1.609 |
| H                          | 1.934  | 1.944  | 0.199  | H                         | 1.952  | 2.072  | 0.015  |
| H                          | 1.883  | 0.249  | -2.297 | H                         | 1.862  | 0.287  | -2.411 |
| H                          | 3.179  | 0.437  | -1.151 | H                         | 3.187  | 0.547  | -1.311 |

|   |        |        |        |   |        |        |        |
|---|--------|--------|--------|---|--------|--------|--------|
| H | 2.021  | -3.082 | 1.648  | H | -0.241 | -3.211 | -0.995 |
| H | 0.892  | -4.353 | 1.253  | H | 0.216  | -4.388 | 0.207  |
| H | -0.206 | -2.215 | 1.87   | H | -0.588 | -2.359 | 1.277  |
| H | -0.68  | -2.739 | 0.28   | H | 1.095  | -2.518 | 1.666  |
| H | 4.81   | -3.392 | -1.479 | H | 4.889  | -3.529 | 0.713  |
| H | 5.203  | -3.436 | 0.235  | H | 4.661  | -3.735 | -1.026 |
| H | 3.34   | -4.784 | 0.74   | H | 2.572  | -4.085 | 1.172  |
| H | -0.765 | 3.229  | 1.867  | H | 0.626  | 3.822  | 0.627  |
| H | -0.888 | 4.551  | 0.762  | H | -0.595 | 3.299  | 1.783  |
| H | 0.622  | 3.677  | 0.875  | H | -0.954 | 4.573  | 0.668  |
| H | -1.16  | 2.816  | -2.428 | H | -1.333 | 2.688  | -2.45  |
| H | 0.07   | 3.876  | -1.748 | H | -0.104 | 3.826  | -1.91  |
| H | -1.621 | 4.257  | -1.539 | H | -1.791 | 4.155  | -1.603 |
| H | 0.341  | -0.208 | 2.762  | H | 0.63   | -0.088 | 2.732  |
| H | -0.168 | 1.426  | 2.546  | H | 0.099  | 1.543  | 2.507  |
| H | 1.424  | 0.929  | 2.001  | H | 1.646  | 1.03   | 1.855  |
| H | 0.565  | -5.081 | -1.206 | H | 1.245  | -3.585 | -2.921 |
| H | 1.459  | -4.264 | -2.486 | H | 1.383  | -5.164 | -2.166 |
| H | 0.134  | -3.445 | -1.687 | H | 2.834  | -4.294 | -2.658 |
| H | -6.391 | 4.336  | 0.448  | H | -5.919 | 4.167  | 1.667  |
| H | -5.175 | 4.719  | 1.674  | H | -6.098 | 4.569  | -0.047 |
| H | -5.009 | 5.359  | 0.035  | H | -4.749 | 5.235  | 0.881  |
| H | 2.744  | -6.11  | -0.976 | H | 3.677  | -5.944 | 0.529  |

**Table S7. Cartesian coordinates and equilibrium populations of low-energy conformers (>1%) of 4 in MeOH.**

| Conformer 1 P (%) = 33.91% |           |           |           | Conformer 2 P (%) = 29.23% |           |           |           |
|----------------------------|-----------|-----------|-----------|----------------------------|-----------|-----------|-----------|
| C                          | -3.212431 | -1.705278 | 0.346447  | C                          | -3.210924 | -1.712977 | 0.339895  |
| C                          | -3.801252 | -0.666332 | -0.608396 | C                          | -3.805902 | -0.674665 | -0.611525 |
| C                          | -3.321476 | 0.773405  | -0.317124 | C                          | -3.319018 | 0.770873  | -0.322441 |
| C                          | -1.762061 | 0.746699  | -0.247558 | C                          | -1.760404 | 0.746818  | -0.248871 |
| C                          | -1.109123 | -0.307326 | 0.70139   | C                          | -1.108661 | -0.309036 | 0.698225  |
| C                          | -1.681187 | -1.699454 | 0.339723  | C                          | -1.679871 | -1.700454 | 0.330945  |
| C                          | -1.111552 | 2.115175  | -0.019905 | C                          | -1.110018 | 2.115447  | -0.020967 |
| C                          | 0.358984  | 2.052892  | -0.43318  | C                          | 0.360947  | 2.053118  | -0.432943 |
| C                          | 1.045948  | 0.770367  | -0.034114 | C                          | 1.04715   | 0.770152  | -0.0339   |
| C                          | 0.413935  | -0.293982 | 0.488252  | C                          | 0.414642  | -0.294747 | 0.486649  |
| C                          | 2.527454  | 0.768701  | -0.302255 | C                          | 2.529137  | 0.768942  | -0.29986  |
| C                          | 3.228385  | -0.594781 | -0.224985 | C                          | 3.22945   | -0.594873 | -0.224996 |
| C                          | 2.68667   | -1.312781 | 1.019214  | C                          | 2.686385  | -1.31591  | 1.016877  |
| C                          | 1.175999  | -1.529616 | 0.924958  | C                          | 1.175697  | -1.531911 | 0.920671  |
| O                          | 3.196698  | 1.571505  | 0.685473  | O                          | 3.195947  | 1.569097  | 0.69167   |
| C                          | 4.581339  | 1.248638  | 0.612925  | C                          | 4.580615  | 1.243475  | 0.626111  |
| C                          | 4.704595  | -0.170507 | 0.013975  | C                          | 4.705109  | -0.170942 | 0.01667   |
| O                          | 5.481935  | -0.045068 | -1.175437 | O                          | 5.481108  | -0.035632 | -1.172447 |
| O                          | -5.230842 | -0.68056  | -0.553245 | O                          | -5.229665 | -0.783577 | -0.654417 |
| C                          | -4.01273  | 1.348062  | 0.934211  | C                          | -4.010195 | 1.346769  | 0.929438  |
| C                          | -3.752102 | 1.641774  | -1.519951 | C                          | -3.753168 | 1.6378    | -1.523154 |
| C                          | -1.347629 | -0.061722 | 2.211484  | C                          | -1.347994 | -0.065386 | 2.208269  |
| C                          | 3.027324  | -1.424808 | -1.493095 | C                          | 3.029926  | -1.422102 | -1.495189 |
| H                          | 2.708284  | 1.210302  | -1.298885 | H                          | 2.711794  | 1.213158  | -1.294908 |
| H                          | -1.449361 | 0.422874  | -1.249657 | H                          | -1.448592 | 0.423112  | -1.25101  |
| O                          | -1.186097 | -2.044785 | -0.963505 | O                          | -1.187996 | -2.035083 | -0.974861 |
| H                          | -3.594934 | -1.535202 | 1.357645  | H                          | -3.578443 | -1.549468 | 1.360677  |
| H                          | -3.565907 | -2.707695 | 0.05545   | H                          | -3.574656 | -2.707034 | 0.045741  |
| H                          | -3.46711  | -0.916077 | -1.626792 | H                          | -3.485385 | -0.927788 | -1.627201 |
| H                          | -1.319619 | -2.436046 | 1.072202  | H                          | -1.314749 | -2.440866 | 1.058029  |
| H                          | -1.192908 | 2.412122  | 1.031047  | H                          | -1.191313 | 2.412688  | 1.030214  |
| H                          | -1.618475 | 2.892771  | -0.598235 | H                          | -1.616843 | 2.892796  | -0.600078 |
| H                          | 0.438448  | 2.163656  | -1.526577 | H                          | 0.441014  | 2.164234  | -1.52618  |
| H                          | 0.921443  | 2.895621  | -0.010105 | H                          | 0.923158  | 2.895615  | -0.009158 |
| H                          | 2.907331  | -0.698121 | 1.899787  | H                          | 2.906522  | -0.703884 | 1.899427  |
| H                          | 3.198715  | -2.274483 | 1.155358  | H                          | 3.197689  | -2.278251 | 1.150751  |
| H                          | 0.808068  | -1.865117 | 1.903057  | H                          | 0.806849  | -1.870326 | 1.89744   |

|   |           |           |           |   |           |           |           |
|---|-----------|-----------|-----------|---|-----------|-----------|-----------|
| H | 0.94932   | -2.346637 | 0.229154  | H | 0.949004  | -2.346725 | 0.222301  |
| H | 4.995774  | 1.331813  | 1.621881  | H | 4.988015  | 1.317052  | 1.638718  |
| H | 5.118123  | 1.940595  | -0.051309 | H | 5.123497  | 1.93997   | -0.028186 |
| H | 5.197837  | -0.868289 | 0.70693   | H | 5.199606  | -0.873285 | 0.704102  |
| H | 5.594879  | -0.933677 | -1.546457 | H | 5.595019  | -0.921239 | -1.550305 |
| H | -5.525378 | -1.554051 | -0.852238 | H | -5.557882 | -0.617829 | 0.243425  |
| H | -5.069615 | 1.52847   | 0.7222    | H | -5.061897 | 1.564392  | 0.712016  |
| H | -3.969395 | 0.682553  | 1.797648  | H | -3.980638 | 0.678498  | 1.793729  |
| H | -3.555188 | 2.300332  | 1.220867  | H | -3.543385 | 2.288902  | 1.231509  |
| H | -3.61294  | 2.708792  | -1.321996 | H | -3.629006 | 2.706714  | -1.324283 |
| H | -3.178401 | 1.38618   | -2.419181 | H | -3.172671 | 1.389866  | -2.419688 |
| H | -4.81231  | 1.475736  | -1.729412 | H | -4.809667 | 1.45517   | -1.739923 |
| H | -2.379654 | -0.236519 | 2.517672  | H | -0.72094  | -0.73737  | 2.802736  |
| H | -0.717152 | -0.730444 | 2.806185  | H | -1.079841 | 0.955252  | 2.488555  |
| H | -1.082956 | 0.960389  | 2.489265  | H | -2.380746 | -0.238244 | 2.514729  |
| H | 3.442083  | -0.908857 | -2.363949 | H | 1.965856  | -1.592962 | -1.684191 |
| H | 3.51098   | -2.407411 | -1.407794 | H | 3.444513  | -0.903715 | -2.364675 |
| H | 1.962859  | -1.594726 | -1.68081  | H | 3.514561  | -2.404332 | -1.411789 |
| H | -1.570937 | -2.902349 | -1.201337 | H | -1.613023 | -2.864909 | -1.241504 |

| <b>Conformer 3 P (%) = 19.63%</b> |           |           |           | <b>Conformer 4 P (%) = 9.35%</b> |           |           |           |
|-----------------------------------|-----------|-----------|-----------|----------------------------------|-----------|-----------|-----------|
| C                                 | -3.215624 | -1.703647 | 0.32797   | C                                | -3.208466 | -1.727289 | 0.273758  |
| C                                 | -3.811462 | -0.646751 | -0.602053 | C                                | -3.81293  | -0.635396 | -0.609915 |
| C                                 | -3.307852 | 0.790001  | -0.298346 | C                                | -3.324008 | 0.789493  | -0.26163  |
| C                                 | -1.748586 | 0.751242  | -0.2413   | C                                | -1.764234 | 0.751184  | -0.227003 |
| C                                 | -1.096942 | -0.324096 | 0.683502  | C                                | -1.106489 | -0.337738 | 0.676445  |
| C                                 | -1.68457  | -1.704621 | 0.301675  | C                                | -1.681189 | -1.715566 | 0.250024  |
| C                                 | -1.083936 | 2.11042   | 0.000392  | C                                | -1.081317 | 2.101037  | 0.009955  |
| C                                 | 0.383484  | 2.041769  | -0.42344  | C                                | 0.370311  | 2.017269  | -0.463266 |
| C                                 | 1.062927  | 0.747373  | -0.050209 | C                                | 1.052645  | 0.722694  | -0.09378  |
| C                                 | 0.424408  | -0.320093 | 0.457385  | C                                | 0.417187  | -0.333801 | 0.445918  |
| C                                 | 2.542705  | 0.742067  | -0.335128 | C                                | 2.534705  | 0.72189   | -0.376438 |
| C                                 | 3.236558  | -0.624424 | -0.256633 | C                                | 3.249948  | -0.629099 | -0.231381 |
| C                                 | 2.686924  | -1.359787 | 0.976107  | C                                | 2.6891    | -1.329617 | 1.016849  |
| C                                 | 1.177163  | -1.571746 | 0.861865  | C                                | 1.184222  | -1.568834 | 0.891968  |
| O                                 | 3.218546  | 1.577661  | 0.633937  | O                                | 3.185373  | 1.612548  | 0.557657  |
| C                                 | 4.526985  | 1.065224  | 0.86257   | C                                | 4.489065  | 1.119614  | 0.851916  |
| C                                 | 4.694437  | -0.190739 | -0.01098  | C                                | 4.695621  | -0.16007  | 0.02559   |
| O                                 | 5.292252  | 0.116849  | -1.269635 | O                                | 5.306678  | 0.116634  | -1.233227 |
| O                                 | -5.236776 | -0.741365 | -0.629779 | O                                | -5.241528 | -0.64595  | -0.52026  |
| C                                 | -3.980301 | 1.354853  | 0.968636  | C                                | -3.986833 | 1.311553  | 1.027537  |
| C                                 | -3.746612 | 1.677522  | -1.482253 | C                                | -3.772771 | 1.714385  | -1.414576 |

|   |           |           |           |   |           |           |           |
|---|-----------|-----------|-----------|---|-----------|-----------|-----------|
| C | -1.318625 | -0.10081  | 2.199508  | C | -1.333453 | -0.142835 | 2.19367   |
| C | 3.045159  | -1.450244 | -1.530661 | C | 3.111316  | -1.506375 | -1.477208 |
| H | 2.71176   | 1.172698  | -1.335122 | H | 2.701213  | 1.110197  | -1.393967 |
| H | -1.449453 | 0.439629  | -1.25102  | H | -1.486738 | 0.454113  | -1.248821 |
| O | -1.210616 | -2.022936 | -1.014196 | O | -1.288815 | -2.065612 | -1.083841 |
| H | -3.570506 | -1.551195 | 1.355037  | H | -3.576655 | -1.620681 | 1.298847  |
| H | -3.591524 | -2.690113 | 0.023819  | H | -3.547609 | -2.708641 | -0.083715 |
| H | -3.50506  | -0.888625 | -1.624741 | H | -3.505295 | -0.837337 | -1.645956 |
| H | -1.318189 | -2.459181 | 1.013418  | H | -1.310988 | -2.485212 | 0.943348  |
| H | -1.154816 | 2.393761  | 1.056192  | H | -1.113101 | 2.371407  | 1.070868  |
| H | -1.588548 | 2.900041  | -0.563948 | H | -1.593652 | 2.902761  | -0.528844 |
| H | 0.457066  | 2.168677  | -1.515404 | H | 0.410987  | 2.133635  | -1.558121 |
| H | 0.955182  | 2.873443  | 0.008888  | H | 0.965836  | 2.844588  | -0.056602 |
| H | 2.892881  | -0.768809 | 1.876126  | H | 2.869195  | -0.704    | 1.898589  |
| H | 3.19563   | -2.324647 | 1.096295  | H | 3.209806  | -2.281137 | 1.180817  |
| H | 0.801433  | -1.936451 | 1.826392  | H | 0.801047  | -1.90659  | 1.861721  |
| H | 0.954359  | -2.365877 | 0.139296  | H | 0.989138  | -2.404532 | 0.206341  |
| H | 4.640817  | 0.83337   | 1.930484  | H | 4.565786  | 0.921879  | 1.929866  |
| H | 5.280912  | 1.822654  | 0.600497  | H | 5.243228  | 1.877059  | 0.59368   |
| H | 5.271881  | -0.974011 | 0.504003  | H | 5.27723   | -0.915136 | 0.576346  |
| H | 6.145972  | 0.5398    | -1.092708 | H | 6.156976  | 0.547692  | -1.059376 |
| H | -5.552399 | -0.58715  | 0.2746    | H | -5.542692 | -1.50678  | -0.848251 |
| H | -3.946478 | 0.674881  | 1.823614  | H | -5.039984 | 1.532206  | 0.836081  |
| H | -3.502324 | 2.289055  | 1.2778    | H | -3.957644 | 0.595766  | 1.850171  |
| H | -5.032576 | 1.583846  | 0.766016  | H | -3.501796 | 2.233641  | 1.364629  |
| H | -3.609463 | 2.742404  | -1.27038  | H | -3.630322 | 2.77153   | -1.169542 |
| H | -3.178639 | 1.436165  | -2.38851  | H | -3.216522 | 1.501042  | -2.335629 |
| H | -4.80723  | 1.508237  | -1.689631 | H | -4.836271 | 1.55653   | -1.612713 |
| H | -0.6908   | -0.786795 | 2.777125  | H | -0.694115 | -0.822182 | 2.765682  |
| H | -1.039032 | 0.913318  | 2.492026  | H | -1.081736 | 0.874186  | 2.502762  |
| H | -2.349477 | -0.269777 | 2.514472  | H | -2.361288 | -0.341191 | 2.496712  |
| H | 3.499295  | -0.949156 | -2.387348 | H | 3.5643    | -1.022761 | -2.344102 |
| H | 3.512289  | -2.43693  | -1.428529 | H | 3.605279  | -2.473537 | -1.330345 |
| H | 1.980287  | -1.595948 | -1.737535 | H | 2.057581  | -1.699497 | -1.703725 |
| H | -1.637944 | -2.850044 | -1.285489 | H | -0.449453 | -1.614979 | -1.269992 |

| <b>Conformer 5 P (%) = 7.88%</b> |           |           |           |
|----------------------------------|-----------|-----------|-----------|
| C                                | -3.208176 | -1.737546 | 0.26087   |
| C                                | -3.823887 | -0.642897 | -0.611313 |
| C                                | -3.321759 | 0.787199  | -0.266899 |
| C                                | -1.763047 | 0.750759  | -0.23118  |
| C                                | -1.106488 | -0.341239 | 0.668587  |

|   |           |           |           |
|---|-----------|-----------|-----------|
| C | -1.680523 | -1.716903 | 0.232933  |
| C | -1.079798 | 2.100321  | 0.007701  |
| C | 0.3724    | 2.017146  | -0.463788 |
| C | 1.054064  | 0.722077  | -0.094758 |
| C | 0.417632  | -0.33596  | 0.440645  |
| C | 2.537011  | 0.722985  | -0.373158 |
| C | 3.252786  | -0.627884 | -0.230111 |
| C | 2.688204  | -1.3333   | 1.013682  |
| C | 1.183912  | -1.572835 | 0.882955  |
| O | 3.183655  | 1.611315  | 0.56602   |
| C | 4.486228  | 1.117628  | 0.86459   |
| C | 4.697119  | -0.15847  | 0.033778  |
| O | 5.312008  | 0.124063  | -1.22164  |
| O | -5.250312 | -0.732847 | -0.608197 |
| C | -3.981702 | 1.312188  | 1.023427  |
| C | -3.776058 | 1.70987   | -1.417494 |
| C | -1.334543 | -0.151604 | 2.186236  |
| C | 3.119316  | -1.500916 | -1.479512 |
| H | 2.70634   | 1.114695  | -1.388855 |
| H | -1.487525 | 0.455047  | -1.253612 |
| O | -1.293452 | -2.050721 | -1.105085 |
| H | -3.558218 | -1.64352  | 1.2969    |
| H | -3.556661 | -2.709714 | -0.102926 |
| H | -3.540569 | -0.848512 | -1.64763  |
| H | -1.305541 | -2.491837 | 0.917985  |
| H | -1.111814 | 2.369601  | 1.069175  |
| H | -1.591922 | 2.902565  | -0.53089  |
| H | 0.414133  | 2.134374  | -1.558436 |
| H | 0.967364  | 2.84414   | -0.05574  |
| H | 2.865089  | -0.711018 | 1.89843   |
| H | 3.208732  | -2.285209 | 1.175694  |
| H | 0.798033  | -1.916511 | 1.849571  |
| H | 0.991943  | -2.405148 | 0.19228   |
| H | 4.557849  | 0.915311  | 1.942048  |
| H | 5.241158  | 1.876498  | 0.613138  |
| H | 5.277456  | -0.915203 | 0.583573  |
| H | 6.163108  | 0.551731  | -1.043407 |
| H | -5.540624 | -0.658126 | 0.314489  |
| H | -3.956942 | 0.598143  | 1.850445  |
| H | -3.491567 | 2.227569  | 1.369017  |
| H | -5.031216 | 1.560007  | 0.831444  |
| H | -3.644665 | 2.76895   | -1.173644 |
| H | -3.217303 | 1.500824  | -2.337587 |

|   |           |           |           |
|---|-----------|-----------|-----------|
| H | -4.837401 | 1.538514  | -1.618628 |
| H | -1.085774 | 0.865185  | 2.498847  |
| H | -2.361501 | -0.355174 | 2.490223  |
| H | -0.693787 | -0.830664 | 2.756822  |
| H | 3.575683  | -1.014229 | -2.342884 |
| H | 3.612898  | -2.468452 | -1.334024 |
| H | 2.066584  | -1.693492 | -1.711111 |
| H | -0.444664 | -1.614527 | -1.28261  |

**Table S8. Cartesian coordinates and equilibrium populations of low-energy conformers (>1%) of 5 in MeOH.**

| Conformer 1 P (%) = 32.27% |          |          |          | Conformer 2 P (%) = 19.16% |          |          |          |
|----------------------------|----------|----------|----------|----------------------------|----------|----------|----------|
| C                          | -2.80953 | -2.28951 | -0.4433  | C                          | -2.81417 | -2.2948  | -0.44121 |
| C                          | -3.85405 | -1.18637 | -0.57851 | C                          | -3.86855 | -1.20103 | -0.57043 |
| C                          | -3.51518 | 0.116904 | 0.199833 | C                          | -3.52313 | 0.12929  | 0.177741 |
| C                          | -2.04099 | 0.557531 | -0.16845 | C                          | -2.04301 | 0.563086 | -0.17981 |
| C                          | -0.92417 | -0.56791 | -0.18952 | C                          | -0.93126 | -0.56726 | -0.19451 |
| C                          | -1.45385 | -1.80342 | -0.95471 | C                          | -1.46463 | -1.80021 | -0.96025 |
| C                          | -1.50045 | 1.771397 | 0.633909 | C                          | -1.49689 | 1.76284  | 0.62867  |
| C                          | -0.20039 | 2.30407  | 0.005673 | C                          | -0.20026 | 2.298031 | -0.00291 |
| C                          | 0.845543 | 1.265785 | -0.3214  | C                          | 0.846559 | 1.259939 | -0.32579 |
| C                          | 0.31516  | 0.006335 | -0.98185 | C                          | 0.314322 | -0.00059 | -0.98282 |
| C                          | 2.151821 | 1.51262  | -0.13138 | C                          | 2.153002 | 1.505999 | -0.13595 |
| C                          | 3.296428 | 0.64099  | -0.61701 | C                          | 3.2975   | 0.633346 | -0.61986 |
| C                          | 2.746117 | -0.34721 | -1.67302 | C                          | 2.745801 | -0.36318 | -1.66728 |
| C                          | 1.432292 | -1.0235  | -1.26031 | C                          | 1.430757 | -1.03426 | -1.24961 |
| C                          | 5.087284 | -1.03182 | 0.354431 | C                          | 5.098797 | -1.02412 | 0.358983 |
| C                          | 3.959158 | -0.03505 | 0.626715 | C                          | 3.965031 | -0.03252 | 0.626609 |
| O                          | 3.027307 | -0.77678 | 1.424139 | O                          | 3.037561 | -0.77495 | 1.428418 |
| C                          | -4.53588 | 1.17394  | -0.30212 | C                          | -4.53629 | 1.171084 | -0.36321 |
| C                          | -3.75964 | -0.06765 | 1.713379 | C                          | -3.77891 | -0.01565 | 1.693987 |
| C                          | -0.47963 | -1.00931 | 1.225289 | C                          | -0.49276 | -1.01318 | 1.22137  |
| C                          | 4.346692 | 1.559831 | -1.2843  | C                          | 4.343838 | 1.54987  | -1.29651 |
| O                          | 5.644478 | -1.49497 | 1.573592 | O                          | 5.658046 | -1.47873 | 1.58053  |
| O                          | -5.14071 | -1.63388 | -0.14308 | O                          | -5.16626 | -1.69401 | -0.2277  |
| O                          | -2.40984 | 2.86191  | 0.784686 | O                          | -2.45418 | 2.825003 | 0.667856 |
| H                          | -3.13128 | -3.1636  | -1.02864 | H                          | -3.14705 | -3.16723 | -1.01602 |
| H                          | -2.75198 | -2.62256 | 0.59938  | H                          | -2.73154 | -2.62565 | 0.604098 |
| H                          | -3.90759 | -0.91231 | -1.64855 | H                          | -3.9568  | -0.95353 | -1.63682 |
| H                          | -2.11096 | 0.89122  | -1.2187  | H                          | -2.10712 | 0.906141 | -1.22449 |
| H                          | -1.55114 | -1.5475  | -2.02106 | H                          | -1.57366 | -1.5407  | -2.02433 |
| H                          | -0.72133 | -2.61652 | -0.89858 | H                          | -0.72867 | -2.61087 | -0.91427 |

|   |          |          |          |   |          |          |          |
|---|----------|----------|----------|---|----------|----------|----------|
| H | -1.30844 | 1.464222 | 1.665056 | H | -1.29596 | 1.43608  | 1.658363 |
| H | -0.49243 | 2.791948 | -0.94156 | H | -0.50784 | 2.787902 | -0.94    |
| H | 0.209588 | 3.094845 | 0.643781 | H | 0.226292 | 3.085733 | 0.634483 |
| H | -0.08836 | 0.318137 | -1.9615  | H | -0.08303 | 0.3082   | -1.96546 |
| H | 2.439361 | 2.450409 | 0.349622 | H | 2.441975 | 2.444892 | 0.342518 |
| H | 3.49702  | -1.1087  | -1.91363 | H | 3.495844 | -1.12757 | -1.90104 |
| H | 2.579694 | 0.219753 | -2.60003 | H | 2.580142 | 0.195797 | -2.59917 |
| H | 1.622731 | -1.63771 | -0.37768 | H | 1.618902 | -1.6407  | -0.36098 |
| H | 1.11227  | -1.70093 | -2.06013 | H | 1.111338 | -1.71835 | -2.04371 |
| H | 4.701715 | -1.87102 | -0.24547 | H | 4.718529 | -1.86799 | -0.23764 |
| H | 5.900151 | -0.55884 | -0.20341 | H | 5.909412 | -0.54876 | -0.20006 |
| H | 4.387882 | 0.773378 | 1.242291 | H | 4.389804 | 0.781575 | 1.237713 |
| H | 2.296297 | -0.17682 | 1.645576 | H | 2.297961 | -0.18076 | 1.636365 |
| H | -4.31376 | 1.48525  | -1.33247 | H | -4.31567 | 1.428199 | -1.40685 |
| H | -5.5369  | 0.733492 | -0.29868 | H | -5.54004 | 0.735922 | -0.32997 |
| H | -4.54537 | 2.059001 | 0.334328 | H | -4.52321 | 2.093181 | 0.215697 |
| H | -4.81839 | -0.27469 | 1.888709 | H | -4.84762 | -0.17395 | 1.875195 |
| H | -3.19567 | -0.89658 | 2.148308 | H | -3.23625 | -0.84586 | 2.157771 |
| H | -3.49919 | 0.846437 | 2.254714 | H | -3.50157 | 0.902742 | 2.218594 |
| H | -0.03217 | -0.19026 | 1.796785 | H | -0.00754 | -0.20775 | 1.781475 |
| H | -1.31103 | -1.39357 | 1.817446 | H | -1.33392 | -1.35719 | 1.824994 |
| H | 0.266251 | -1.80717 | 1.164121 | H | 0.219269 | -1.8417  | 1.161906 |
| H | 4.797715 | 2.247677 | -0.55849 | H | 4.797611 | 2.241949 | -0.57637 |
| H | 5.154299 | 0.980326 | -1.74527 | H | 5.149818 | 0.968531 | -1.75794 |
| H | 3.879313 | 2.162968 | -2.07008 | H | 3.872411 | 2.148212 | -2.08348 |
| H | 4.881062 | -1.74384 | 2.121865 | H | 4.896237 | -1.7337  | 2.128141 |
| H | -5.37414 | -2.40717 | -0.67914 | H | -5.11097 | -2.05167 | 0.672417 |
| H | -2.64561 | 3.174414 | -0.1038  | H | -2.05292 | 3.550247 | 1.172622 |

| <b>Conformer 3 P (%) = 12.52%</b> |          |          |          | <b>Conformer 4 P (%) = 12.04%</b> |          |          |          |
|-----------------------------------|----------|----------|----------|-----------------------------------|----------|----------|----------|
| C                                 | -2.80867 | -2.29518 | -0.41114 | C                                 | -2.80487 | -2.30426 | -0.40638 |
| C                                 | -3.85858 | -1.19965 | -0.56078 | C                                 | -3.85381 | -1.21641 | -0.56672 |
| C                                 | -3.52471 | 0.125826 | 0.183427 | C                                 | -3.52328 | 0.11741  | 0.182744 |
| C                                 | -2.04582 | 0.561274 | -0.17947 | C                                 | -2.04642 | 0.561704 | -0.17712 |
| C                                 | -0.9302  | -0.56685 | -0.1864  | C                                 | -0.92922 | -0.56598 | -0.18228 |
| C                                 | -1.46044 | -1.80834 | -0.94016 | C                                 | -1.45728 | -1.81189 | -0.93046 |
| C                                 | -1.50277 | 1.765417 | 0.62434  | C                                 | -1.50425 | 1.765288 | 0.629709 |
| C                                 | -0.20199 | 2.296429 | -0.00399 | C                                 | -0.20289 | 2.29741  | 0.003628 |
| C                                 | 0.845193 | 1.258727 | -0.32638 | C                                 | 0.844288 | 1.260594 | -0.32249 |
| C                                 | 0.31259  | -0.00276 | -0.98063 | C                                 | 0.311133 | 0.000362 | -0.97854 |
| C                                 | 2.151764 | 1.505337 | -0.13836 | C                                 | 2.150878 | 1.507527 | -0.13544 |
| C                                 | 3.295891 | 0.632464 | -0.62285 | C                                 | 3.294401 | 0.63561  | -0.62308 |

|   |          |          |          |   |          |          |          |
|---|----------|----------|----------|---|----------|----------|----------|
| C | 2.743207 | -0.36592 | -1.668   | C | 2.740695 | -0.35965 | -1.67073 |
| C | 1.428697 | -1.03662 | -1.24794 | C | 1.427048 | -1.03226 | -1.25118 |
| C | 5.101272 | -1.02073 | 0.355894 | C | 5.09839  | -1.02242 | 0.349963 |
| C | 3.965567 | -0.0313  | 0.62352  | C | 3.964492 | -0.03187 | 0.621229 |
| O | 3.040341 | -0.7753  | 1.426194 | O | 3.039246 | -0.77626 | 1.423451 |
| C | -4.5386  | 1.166084 | -0.36302 | C | -4.52912 | 1.164919 | -0.36372 |
| C | -3.78018 | -0.0185  | 1.69937  | C | -3.77931 | -0.02673 | 1.696927 |
| C | -0.48711 | -1.00083 | 1.231911 | C | -0.48174 | -0.99672 | 1.23585  |
| C | 4.340859 | 1.548285 | -1.30254 | C | 4.339362 | 1.552885 | -1.30076 |
| O | 5.660937 | -1.47473 | 1.577505 | O | 5.659966 | -1.47876 | 1.569772 |
| O | -5.13978 | -1.6455  | -0.10625 | O | -5.09817 | -1.78633 | -0.15864 |
| O | -2.45609 | 2.8319   | 0.64967  | O | -2.45603 | 2.835057 | 0.658086 |
| H | -3.1292  | -3.18129 | -0.97884 | H | -3.13311 | -3.18665 | -0.96783 |
| H | -2.74196 | -2.6093  | 0.636902 | H | -2.74058 | -2.61303 | 0.643624 |
| H | -3.9214  | -0.95033 | -1.63582 | H | -3.90389 | -0.97044 | -1.64292 |
| H | -2.10888 | 0.899157 | -1.22605 | H | -2.10748 | 0.900557 | -1.22371 |
| H | -1.5691  | -1.55945 | -2.00707 | H | -1.56152 | -1.56981 | -1.99931 |
| H | -0.72354 | -2.61749 | -0.88545 | H | -0.71805 | -2.61843 | -0.86824 |
| H | -1.31041 | 1.44495  | 1.657217 | H | -1.3149  | 1.442916 | 1.662236 |
| H | -0.50728 | 2.786495 | -0.94172 | H | -0.50779 | 2.79096  | -0.93246 |
| H | 0.223805 | 3.08421  | 0.63372  | H | 0.223063 | 3.082877 | 0.644155 |
| H | -0.08719 | 0.303933 | -1.96298 | H | -0.09106 | 0.30856  | -1.95945 |
| H | 2.441148 | 2.444591 | 0.339133 | H | 2.440687 | 2.44557  | 0.344217 |
| H | 3.493237 | -1.13051 | -1.90134 | H | 3.49069  | -1.12322 | -1.90734 |
| H | 2.576417 | 0.191619 | -2.60059 | H | 2.572738 | 0.200778 | -2.60138 |
| H | 1.618005 | -1.64249 | -0.35919 | H | 1.618016 | -1.64143 | -0.36512 |
| H | 1.108233 | -1.72146 | -2.04111 | H | 1.105104 | -1.71423 | -2.04608 |
| H | 4.722709 | -1.86518 | -0.24105 | H | 4.717459 | -1.86548 | -0.24736 |
| H | 5.911209 | -0.54377 | -0.2028  | H | 5.907865 | -0.54577 | -0.20965 |
| H | 4.389019 | 0.784111 | 1.233831 | H | 4.389941 | 0.78159  | 1.23276  |
| H | 2.298879 | -0.18337 | 1.634119 | H | 2.298624 | -0.18413 | 1.633633 |
| H | -4.33051 | 1.402998 | -1.41439 | H | -4.37754 | 1.337444 | -1.43684 |
| H | -5.5462  | 0.743942 | -0.30513 | H | -5.56073 | 0.81361  | -0.22446 |
| H | -4.50617 | 2.097126 | 0.19993  | H | -4.43706 | 2.121084 | 0.147034 |
| H | -4.83697 | -0.23694 | 1.871598 | H | -4.82455 | -0.29736 | 1.870201 |
| H | -3.20623 | -0.82421 | 2.165089 | H | -3.17149 | -0.80286 | 2.168261 |
| H | -3.53958 | 0.916528 | 2.213842 | H | -3.58481 | 0.92057  | 2.208752 |
| H | -0.00974 | -0.18747 | 1.78721  | H | -1.31366 | -1.36522 | 1.837166 |
| H | -1.32476 | -1.34976 | 1.836965 | H | 0.252157 | -1.80586 | 1.176988 |
| H | 0.233397 | -1.8223  | 1.176096 | H | -0.01845 | -0.17905 | 1.796646 |
| H | 4.795825 | 2.241322 | -0.58407 | H | 4.794517 | 2.24427  | -0.58082 |
| H | 5.146114 | 0.966546 | -1.7648  | H | 5.144479 | 0.972036 | -1.76433 |
| H | 3.867799 | 2.145655 | -2.08928 | H | 3.866373 | 2.151972 | -2.08626 |

|   |          |          |          |   |          |          |          |
|---|----------|----------|----------|---|----------|----------|----------|
| H | 4.899101 | -1.7289  | 2.125509 | H | 4.89923  | -1.73558 | 2.118048 |
| H | -5.38073 | -2.4188  | -0.63889 | H | -5.80514 | -1.17174 | -0.40624 |
| H | -2.06415 | 3.549893 | 1.171695 | H | -2.06008 | 3.552547 | 1.177758 |

| <b>Conformer 5 P (%) = 11.28%</b> |          |          |          | <b>Conformer 6 P (%) = 6.44%</b> |          |          |          |
|-----------------------------------|----------|----------|----------|----------------------------------|----------|----------|----------|
| C                                 | -2.98983 | -2.24617 | 0.146844 | C                                | -2.99178 | -2.25042 | 0.15457  |
| C                                 | -3.97472 | -1.13705 | -0.20702 | C                                | -3.98869 | -1.15112 | -0.19377 |
| C                                 | -3.51584 | 0.284755 | 0.222117 | C                                | -3.52414 | 0.291359 | 0.19325  |
| C                                 | -2.03686 | 0.519058 | -0.29536 | C                                | -2.03853 | 0.521662 | -0.30967 |
| C                                 | -0.99521 | -0.65912 | -0.09666 | C                                | -1.00193 | -0.65886 | -0.10138 |
| C                                 | -1.64601 | -1.99176 | -0.53385 | C                                | -1.65556 | -1.98927 | -0.53833 |
| C                                 | -1.37481 | 1.840121 | 0.177974 | C                                | -1.37211 | 1.829076 | 0.174775 |
| C                                 | -0.10037 | 2.121311 | -0.63516 | C                                | -0.10181 | 2.114451 | -0.6424  |
| C                                 | 0.867423 | 0.96763  | -0.72414 | C                                | 0.867977 | 0.962054 | -0.72583 |
| C                                 | 0.236658 | -0.37555 | -1.04267 | C                                | 0.236353 | -0.3819  | -1.04069 |
| C                                 | 2.188214 | 1.158306 | -0.59335 | C                                | 2.188752 | 1.152351 | -0.59407 |
| C                                 | 3.25865  | 0.112281 | -0.83869 | C                                | 3.259368 | 0.105932 | -0.83716 |
| C                                 | 2.630625 | -1.0531  | -1.64243 | C                                | 2.629995 | -1.06482 | -1.63178 |
| C                                 | 1.282413 | -1.51201 | -1.07528 | C                                | 1.281951 | -1.51856 | -1.06012 |
| C                                 | 4.357337 | 0.636402 | 1.466386 | C                                | 4.370418 | 0.642912 | 1.459424 |
| C                                 | 3.812373 | -0.42753 | 0.512117 | C                                | 3.818314 | -0.4259  | 0.514752 |
| O                                 | 4.841775 | -1.37261 | 0.238845 | O                                | 4.844771 | -1.3743  | 0.243024 |
| C                                 | -4.491   | 1.266666 | -0.48171 | C                                | -4.49359 | 1.244859 | -0.5515  |
| C                                 | -3.69402 | 0.481151 | 1.743501 | C                                | -3.71397 | 0.533709 | 1.707034 |
| C                                 | -0.49881 | -0.79104 | 1.365433 | C                                | -0.51422 | -0.79376 | 1.364279 |
| C                                 | 4.397832 | 0.739666 | -1.6719  | C                                | 4.395151 | 0.729777 | -1.67776 |
| O                                 | 4.853914 | -0.08825 | 2.599784 | O                                | 4.866144 | -0.07432 | 2.59792  |
| O                                 | -5.26027 | -1.37593 | 0.373436 | O                                | -5.29179 | -1.45405 | 0.312585 |
| O                                 | -2.21021 | 2.998581 | 0.131109 | O                                | -2.26588 | 2.938551 | 0.037581 |
| H                                 | -3.39844 | -3.21114 | -0.18847 | H                                | -3.40947 | -3.21242 | -0.16576 |
| H                                 | -2.88047 | -2.31805 | 1.235301 | H                                | -2.85585 | -2.31575 | 1.243999 |
| H                                 | -4.07091 | -1.12241 | -1.3087  | H                                | -4.12376 | -1.16383 | -1.28364 |
| H                                 | -2.14403 | 0.606553 | -1.39095 | H                                | -2.1367  | 0.619033 | -1.40255 |
| H                                 | -1.80023 | -1.97543 | -1.62395 | H                                | -1.82283 | -1.96924 | -1.62615 |
| H                                 | -0.96047 | -2.82217 | -0.33152 | H                                | -0.96619 | -2.81915 | -0.34685 |
| H                                 | -1.11977 | 1.75686  | 1.237941 | H                                | -1.1065  | 1.722052 | 1.236112 |
| H                                 | -0.4328  | 2.372409 | -1.65881 | H                                | -0.44689 | 2.37224  | -1.65608 |
| H                                 | 0.387364 | 3.01878  | -0.23876 | H                                | 0.401889 | 3.007778 | -0.24598 |
| H                                 | -0.18843 | -0.29119 | -2.05851 | H                                | -0.18201 | -0.3022  | -2.05926 |
| H                                 | 2.541081 | 2.165957 | -0.3656  | H                                | 2.542651 | 2.1606   | -0.36947 |
| H                                 | 3.331872 | -1.89318 | -1.67401 | H                                | 3.330943 | -1.90527 | -1.65799 |
| H                                 | 2.48774  | -0.71233 | -2.67712 | H                                | 2.486084 | -0.73171 | -2.66876 |

|   |          |          |          |   |          |          |          |
|---|----------|----------|----------|---|----------|----------|----------|
| H | 1.438315 | -1.9139  | -0.06855 | H | 1.436944 | -1.90997 | -0.04893 |
| H | 0.90307  | -2.34496 | -1.67787 | H | 0.903264 | -2.35739 | -1.65459 |
| H | 5.168294 | 1.202068 | 0.988335 | H | 5.182761 | 1.20069  | 0.974653 |
| H | 3.56342  | 1.334651 | 1.763844 | H | 3.580691 | 1.34763  | 1.753271 |
| H | 2.987075 | -0.92464 | 1.047417 | H | 2.994398 | -0.91794 | 1.056925 |
| H | 5.266802 | -1.53516 | 1.099165 | H | 5.270717 | -1.53541 | 1.103128 |
| H | -4.30222 | 1.309324 | -1.56349 | H | -4.30998 | 1.224028 | -1.63311 |
| H | -5.51721 | 0.916578 | -0.33833 | H | -5.52113 | 0.909124 | -0.37932 |
| H | -4.40856 | 2.274602 | -0.07422 | H | -4.38939 | 2.275855 | -0.21654 |
| H | -4.75642 | 0.431369 | 1.996135 | H | -4.78184 | 0.527555 | 1.952138 |
| H | -3.19    | -0.28143 | 2.342622 | H | -3.2252  | -0.21498 | 2.339679 |
| H | -3.31904 | 1.462806 | 2.046336 | H | -3.32926 | 1.517654 | 1.987828 |
| H | -1.31554 | -0.77608 | 2.087692 | H | -1.33158 | -0.73622 | 2.084525 |
| H | 0.033414 | -1.73784 | 1.506404 | H | -0.022   | -1.75998 | 1.518705 |
| H | 0.196685 | 0.009069 | 1.636109 | H | 0.211999 | -0.01904 | 1.628292 |
| H | 4.826899 | 1.621864 | -1.18203 | H | 4.825629 | 1.614954 | -1.19436 |
| H | 5.201114 | 0.01429  | -1.82823 | H | 5.198335 | 0.004062 | -1.83309 |
| H | 4.018365 | 1.061389 | -2.64799 | H | 4.012031 | 1.045754 | -2.65424 |
| H | 5.402943 | 0.509235 | 3.127947 | H | 5.432178 | 0.520261 | 3.111161 |
| H | -5.56418 | -2.23927 | 0.053819 | H | -5.20701 | -1.5755  | 1.271342 |
| H | -2.47176 | 3.132849 | -0.79426 | H | -1.78067 | 3.728482 | 0.324305 |

| <b>Conformer 7 P (%) = 6.28%</b> |          |          |          |
|----------------------------------|----------|----------|----------|
| C                                | -2.9845  | -2.2522  | 0.152953 |
| C                                | -3.9825  | -1.15469 | -0.1984  |
| C                                | -3.52083 | 0.288838 | 0.188218 |
| C                                | -2.03463 | 0.521488 | -0.31206 |
| C                                | -0.99713 | -0.6578  | -0.10212 |
| C                                | -1.64808 | -1.98967 | -0.53885 |
| C                                | -1.3703  | 1.829373 | 0.174594 |
| C                                | -0.09915 | 2.11732  | -0.64092 |
| C                                | 0.871791 | 0.966115 | -0.72624 |
| C                                | 0.240373 | -0.37787 | -1.04126 |
| C                                | 2.192719 | 1.157862 | -0.59602 |
| C                                | 3.265916 | 0.113183 | -0.8334  |
| C                                | 2.631471 | -1.05076 | -1.63324 |
| C                                | 1.286761 | -1.51367 | -1.06004 |
| C                                | 4.376077 | 0.657321 | 1.478573 |
| C                                | 3.818793 | -0.40844 | 0.532085 |
| O                                | 4.908909 | -1.33365 | 0.359291 |
| C                                | -4.48985 | 1.240322 | -0.55964 |
| C                                | -3.71385 | 0.5321   | 1.701495 |

|   |          |          |          |
|---|----------|----------|----------|
| C | -0.51047 | -0.7904  | 1.364155 |
| C | 4.406704 | 0.734236 | -1.66802 |
| O | 4.808622 | 0.063066 | 2.690677 |
| O | -5.28566 | -1.45967 | 0.305169 |
| O | -2.2652  | 2.936981 | 0.036041 |
| H | -3.4002  | -3.21515 | -0.16688 |
| H | -2.84962 | -2.31606 | 1.242514 |
| H | -4.11513 | -1.16877 | -1.28859 |
| H | -2.13116 | 0.619299 | -1.40508 |
| H | -1.81434 | -1.97111 | -1.6269  |
| H | -0.95811 | -2.81893 | -0.34532 |
| H | -1.10604 | 1.721942 | 1.236066 |
| H | -0.4436  | 2.376789 | -1.65434 |
| H | 0.403758 | 3.009757 | -0.24247 |
| H | -0.17718 | -0.30052 | -2.06017 |
| H | 2.546789 | 2.164475 | -0.36787 |
| H | 3.331418 | -1.89542 | -1.69389 |
| H | 2.483131 | -0.71185 | -2.66716 |
| H | 1.438722 | -1.90194 | -0.04649 |
| H | 0.909891 | -2.35366 | -1.6538  |
| H | 5.200132 | 1.200406 | 0.990493 |
| H | 3.596048 | 1.378814 | 1.736189 |
| H | 3.004781 | -0.91007 | 1.07394  |
| H | 4.543553 | -2.1938  | 0.106569 |
| H | -4.30463 | 1.217894 | -1.64096 |
| H | -5.51731 | 0.903945 | -0.38857 |
| H | -4.38698 | 2.271859 | -0.22611 |
| H | -4.78219 | 0.526217 | 1.944314 |
| H | -3.2266  | -0.21618 | 2.335915 |
| H | -3.33    | 1.516119 | 1.982916 |
| H | -1.32848 | -0.72797 | 2.083033 |
| H | -0.02302 | -1.7586  | 1.523087 |
| H | 0.217612 | -0.01745 | 1.627894 |
| H | 4.824865 | 1.62592  | -1.18804 |
| H | 5.219221 | 0.013814 | -1.80379 |
| H | 4.035921 | 1.034579 | -2.65421 |
| H | 5.362392 | -0.68652 | 2.412349 |
| H | -5.2049  | -1.5734  | 1.265238 |
| H | -1.78811 | 3.725642 | 0.339444 |

**Table S9. Cartesian coordinates and equilibrium populations of low-energy conformers (>1%) of 6 in MeOH.**

| Conformer 1 P (%) = 46.57% |           |           |           | Conformer 2 P (%) = 24.59% |           |           |           |
|----------------------------|-----------|-----------|-----------|----------------------------|-----------|-----------|-----------|
| C                          | -2.865156 | -1.737685 | -0.141729 | C                          | -2.932892 | -1.739771 | -0.236646 |
| C                          | -3.783488 | -0.556454 | -0.422721 | C                          | -3.854469 | -0.53173  | -0.377397 |
| C                          | -3.312508 | 0.751848  | 0.246578  | C                          | -3.350058 | 0.714074  | 0.38155   |
| C                          | -1.825777 | 0.999599  | -0.175235 | C                          | -1.879831 | 0.989064  | -0.080624 |
| C                          | -0.824988 | -0.198392 | -0.035458 | C                          | -0.883089 | -0.222096 | -0.082355 |
| C                          | -1.457179 | -1.462628 | -0.654531 | C                          | -1.545286 | -1.429985 | -0.779861 |
| C                          | -1.22115  | 2.274069  | 0.43074   | C                          | -1.241139 | 2.204917  | 0.605671  |
| C                          | 0.108175  | 2.631896  | -0.249581 | C                          | 0.063586  | 2.613235  | -0.093562 |
| C                          | 1.067416  | 1.471455  | -0.383551 | C                          | 1.00794   | 1.463869  | -0.361198 |
| C                          | 0.448976  | 0.176887  | -0.877828 | C                          | 0.360898  | 0.218973  | -0.938073 |
| C                          | 2.385468  | 1.629515  | -0.186678 | C                          | 2.333391  | 1.601364  | -0.208714 |
| C                          | 3.446479  | 0.590034  | -0.488562 | C                          | 3.373337  | 0.588709  | -0.642272 |
| C                          | 2.851413  | -0.466481 | -1.44384  | C                          | 2.726426  | -0.36945  | -1.66531  |
| C                          | 1.472797  | -0.966365 | -1.011029 | C                          | 1.37022   | -0.91327  | -1.211528 |
| C                          | 4.894921  | -1.196677 | 0.796225  | C                          | 4.887359  | -1.275621 | 0.414198  |
| C                          | 3.970285  | 0.025369  | 0.871559  | C                          | 3.929058  | -0.108868 | 0.635309  |
| O                          | 2.916134  | -0.379006 | 1.747974  | O                          | 2.898345  | -0.655859 | 1.464675  |
| C                          | -4.19376  | 1.885343  | -0.323606 | C                          | -4.245654 | 1.89614   | -0.050062 |
| C                          | -3.553996 | 0.707536  | 1.767735  | C                          | -3.528732 | 0.537012  | 1.901478  |
| C                          | -0.422389 | -0.486543 | 1.42497   | C                          | -0.429192 | -0.638985 | 1.33049   |
| C                          | 4.623112  | 1.291486  | -1.196388 | C                          | 4.531768  | 1.343551  | -1.325126 |
| H                          | -1.884303 | 1.176003  | -1.261653 | H                          | -1.982763 | 1.256512  | -1.145096 |
| O                          | 4.177679  | -2.393238 | 0.545895  | O                          | 5.371901  | -1.759113 | 1.655702  |
| O                          | -5.10798  | -0.857502 | -0.006683 | O                          | -5.164064 | -0.868735 | 0.05045   |
| O                          | -3.469975 | -2.850113 | -0.821674 | O                          | -3.533769 | -2.872709 | -0.885453 |
| H                          | 0.068542  | 0.392107  | -1.890653 | H                          | -0.056591 | 0.522942  | -1.913346 |
| H                          | -2.861759 | -1.936894 | 0.938156  | H                          | -2.885708 | -2.037968 | 0.814017  |
| H                          | -3.764641 | -0.400669 | -1.516935 | H                          | -3.87243  | -0.272123 | -1.456066 |
| H                          | -1.520313 | -1.348823 | -1.745165 | H                          | -1.64078  | -1.210808 | -1.855857 |
| H                          | -0.818749 | -2.334708 | -0.465524 | H                          | -0.916079 | -2.321508 | -0.692617 |
| H                          | -1.069035 | 2.15212   | 1.508136  | H                          | -1.0468   | 1.990511  | 1.661363  |
| H                          | -1.911949 | 3.114184  | 0.31316   | H                          | -1.92902  | 3.055345  | 0.587958  |
| H                          | 0.594932  | 3.471257  | 0.260563  | H                          | 0.575903  | 3.403787  | 0.466954  |
| H                          | -0.124262 | 2.980844  | -1.268613 | H                          | -0.204904 | 3.049422  | -1.069209 |
| H                          | 2.74749   | 2.596963  | 0.167037  | H                          | 2.71793   | 2.535018  | 0.206438  |
| H                          | 3.53297   | -1.315052 | -1.538893 | H                          | 3.405197  | -1.197267 | -1.897784 |
| H                          | 2.765405  | -0.000084 | -2.434987 | H                          | 2.593617  | 0.191448  | -2.600633 |
| H                          | 1.582705  | -1.503495 | -0.067741 | H                          | 1.523421  | -1.520505 | -0.318516 |

|   |           |           |           |   |           |           |           |
|---|-----------|-----------|-----------|---|-----------|-----------|-----------|
| H | 1.107038  | -1.694771 | -1.742556 | H | 0.967906  | -1.576136 | -1.985309 |
| H | 5.629824  | -1.083051 | -0.005555 | H | 4.372812  | -2.07228  | -0.144805 |
| H | 5.446376  | -1.268454 | 1.747057  | H | 5.758815  | -0.959008 | -0.165103 |
| H | 4.538534  | 0.842941  | 1.345893  | H | 4.476902  | 0.656475  | 1.209278  |
| H | 2.189354  | 0.255436  | 1.624366  | H | 2.238746  | 0.044595  | 1.599912  |
| H | -3.990832 | 2.04672   | -1.389359 | H | -4.088539 | 2.1474    | -1.106259 |
| H | -5.248431 | 1.618809  | -0.216007 | H | -5.297019 | 1.627153  | 0.082605  |
| H | -4.030259 | 2.832143  | 0.200525  | H | -4.050818 | 2.793667  | 0.545131  |
| H | -4.625706 | 0.623376  | 1.961694  | H | -4.59232  | 0.44268   | 2.131971  |
| H | -3.070474 | -0.137885 | 2.260323  | H | -3.033467 | -0.350948 | 2.297618  |
| H | -3.191467 | 1.623837  | 2.244456  | H | -3.137585 | 1.405521  | 2.440749  |
| H | -1.262924 | -0.842907 | 2.020547  | H | -1.25105  | -1.039746 | 1.923897  |
| H | 0.351608  | -1.256205 | 1.471207  | H | 0.337651  | -1.415005 | 1.281563  |
| H | -0.030369 | 0.402087  | 1.927486  | H | -0.01056  | 0.201437  | 1.891062  |
| H | 5.092054  | 2.041704  | -0.548567 | H | 5.044511  | 2.009562  | -0.621201 |
| H | 5.392578  | 0.57163   | -1.49589  | H | 5.273265  | 0.65035   | -1.736774 |
| H | 4.272176  | 1.799704  | -2.100229 | H | 4.151382  | 1.954711  | -2.15024  |
| H | 3.404857  | -2.336967 | 1.134407  | H | 4.581276  | -1.853369 | 2.213579  |
| H | -5.263658 | -1.766347 | -0.315701 | H | -5.28476  | -1.793225 | -0.230961 |
| H | -3.026076 | -3.659547 | -0.527509 | H | -3.479283 | -2.714097 | -1.843123 |

| <b>Conformer 3 P (%) = 12.17%</b> |           |           |           | <b>Conformer 4 P (%) = 10.19%</b> |           |           |           |
|-----------------------------------|-----------|-----------|-----------|-----------------------------------|-----------|-----------|-----------|
| C                                 | -2.928299 | -1.75239  | -0.275474 | C                                 | -2.92612  | -1.75698  | -0.247602 |
| C                                 | -3.851386 | -0.541078 | -0.377221 | C                                 | -3.844033 | -0.548895 | -0.380903 |
| C                                 | -3.343876 | 0.708254  | 0.381841  | C                                 | -3.347052 | 0.704073  | 0.381496  |
| C                                 | -1.873756 | 0.984083  | -0.083885 | C                                 | -1.876776 | 0.986451  | -0.077326 |
| C                                 | -0.881173 | -0.228457 | -0.095282 | C                                 | -0.881874 | -0.226008 | -0.081617 |
| C                                 | -1.544824 | -1.420038 | -0.813775 | C                                 | -1.542509 | -1.426896 | -0.786615 |
| C                                 | -1.234739 | 2.200476  | 0.602257  | C                                 | -1.239514 | 2.199969  | 0.615837  |
| C                                 | 0.066128  | 2.611736  | -0.10181  | C                                 | 0.065378  | 2.611299  | -0.081497 |
| C                                 | 1.011583  | 1.462797  | -0.365343 | C                                 | 1.009319  | 1.46303   | -0.354796 |
| C                                 | 0.365922  | 0.218601  | -0.944555 | C                                 | 0.361817  | 0.220531  | -0.935769 |
| C                                 | 2.336389  | 1.601553  | -0.208183 | C                                 | 2.334746  | 1.60164   | -0.203182 |
| C                                 | 3.37759   | 0.588436  | -0.637566 | C                                 | 3.374728  | 0.591336  | -0.641849 |
| C                                 | 2.734373  | -0.367734 | -1.664845 | C                                 | 2.726869  | -0.363927 | -1.667146 |
| C                                 | 1.376192  | -0.912835 | -1.218568 | C                                 | 1.371182  | -0.910211 | -1.21471  |
| C                                 | 4.881941  | -1.280204 | 0.424894  | C                                 | 4.891943  | -1.274694 | 0.406795  |
| C                                 | 3.92634   | -0.110613 | 0.642294  | C                                 | 3.933297  | -0.109187 | 0.632923  |
| O                                 | 2.890785  | -0.654172 | 1.467954  | O                                 | 2.904954  | -0.658659 | 1.463172  |
| C                                 | -4.239719 | 1.892415  | -0.040972 | C                                 | -4.239326 | 1.887705  | -0.052713 |
| C                                 | -3.507193 | 0.535652  | 1.906532  | C                                 | -3.525989 | 0.53309   | 1.901466  |
| C                                 | -0.432459 | -0.654476 | 1.316422  | C                                 | -0.424849 | -0.645317 | 1.329888  |

|   |           |           |           |   |           |           |           |
|---|-----------|-----------|-----------|---|-----------|-----------|-----------|
| C | 4.540164  | 1.34289   | -1.313716 | C | 4.531369  | 1.349665  | -1.323901 |
| H | -1.98458  | 1.253594  | -1.146636 | H | -1.977658 | 1.257383  | -1.141272 |
| O | 5.359252  | -1.765733 | 1.668666  | O | 5.3784    | -1.761657 | 1.646422  |
| O | -5.185627 | -0.929119 | -0.012138 | O | -5.137985 | -0.996843 | 0.052288  |
| O | -3.462006 | -2.826665 | -1.036579 | O | -3.445984 | -2.844589 | -1.000858 |
| H | -0.049458 | 0.523882  | -1.920104 | H | -0.056319 | 0.527166  | -1.909763 |
| H | -2.855494 | -2.054835 | 0.783956  | H | -2.868302 | -2.038994 | 0.814682  |
| H | -3.933882 | -0.288946 | -1.441469 | H | -3.888368 | -0.305212 | -1.45476  |
| H | -1.655769 | -1.191464 | -1.882716 | H | -1.648875 | -1.214357 | -1.859441 |
| H | -0.91529  | -2.313073 | -0.747831 | H | -0.9122   | -2.318007 | -0.704998 |
| H | -1.030306 | 1.983502  | 1.65578   | H | -1.045185 | 1.979135  | 1.670173  |
| H | -1.923911 | 3.050359  | 0.591583  | H | -1.924298 | 3.053386  | 0.6037    |
| H | 0.576462  | 3.405617  | 0.455776  | H | 0.57721   | 3.399196  | 0.483258  |
| H | -0.205897 | 3.043741  | -1.078252 | H | -0.203395 | 3.052409  | -1.054882 |
| H | 2.719144  | 2.53587   | 0.20726   | H | 2.71907   | 2.533934  | 0.215429  |
| H | 3.414071  | -1.195083 | -1.896215 | H | 3.40589   | -1.190542 | -1.903156 |
| H | 2.605756  | 0.194973  | -2.599632 | H | 2.593241  | 0.200013  | -2.600556 |
| H | 1.525494  | -1.523731 | -0.327373 | H | 1.525083  | -1.52135  | -0.324521 |
| H | 0.976148  | -1.572069 | -1.995951 | H | 0.967529  | -1.569534 | -1.990196 |
| H | 4.367496  | -2.074955 | -0.136677 | H | 4.377042  | -2.069835 | -0.153818 |
| H | 5.757206  | -0.966118 | -0.150017 | H | 5.762525  | -0.95577  | -0.172597 |
| H | 4.474244  | 0.653229  | 1.218366  | H | 4.482021  | 0.655187  | 1.207579  |
| H | 2.227661  | 0.045259  | 1.590687  | H | 2.24001   | 0.037767  | 1.593117  |
| H | -4.068339 | 2.162691  | -1.089641 | H | -4.124865 | 2.105546  | -1.121578 |
| H | -5.291929 | 1.613836  | 0.067695  | H | -5.295308 | 1.663738  | 0.139925  |
| H | -4.06074  | 2.780964  | 0.572411  | H | -4.009726 | 2.800008  | 0.505072  |
| H | -4.570184 | 0.542078  | 2.176001  | H | -4.586102 | 0.39957   | 2.132611  |
| H | -3.068482 | -0.386383 | 2.293758  | H | -2.999483 | -0.332617 | 2.304087  |
| H | -3.046588 | 1.36885   | 2.444454  | H | -3.17048  | 1.419969  | 2.435471  |
| H | -1.257686 | -1.0545   | 1.906248  | H | -1.24204  | -1.062064 | 1.918658  |
| H | 0.328294  | -1.436132 | 1.265153  | H | 0.348831  | -1.413972 | 1.274748  |
| H | -0.007739 | 0.179581  | 1.882784  | H | -0.013389 | 0.19381   | 1.898268  |
| H | 5.049714  | 2.008236  | -0.606777 | H | 5.044552  | 2.014112  | -0.618721 |
| H | 5.283187  | 0.649177  | -1.721673 | H | 5.272912  | 0.658493  | -1.738858 |
| H | 4.164694  | 1.954507  | -2.140734 | H | 4.14915   | 1.96282   | -2.146705 |
| H | 4.565312  | -1.8603   | 2.2217    | H | 4.588037  | -1.860177 | 2.203921  |
| H | -5.17893  | -1.119988 | 0.940144  | H | -5.806837 | -0.413525 | -0.333792 |
| H | -4.424081 | -2.78125  | -0.893546 | H | -4.391002 | -2.873746 | -0.771962 |

|                                  |          |          |   |
|----------------------------------|----------|----------|---|
| <b>Conformer 5 P (%) = 6.48%</b> |          |          |   |
| C                                | -        | -        | - |
| 3.082722                         | 1.676676 | 0.165977 |   |

|   |          |          |          |
|---|----------|----------|----------|
|   | -        | -        | -        |
| C | 3.953354 | 0.447761 | 0.055996 |
|   | -        | -        | -        |
| C | 3.272542 | 0.866007 | 0.381585 |
|   | -        | -        | -        |
| C | 1.869319 | 0.936683 | 0.310571 |
|   | -        | -        | -        |
| C | 0.945435 | 0.328006 | 0.203978 |
|   | -        | -        | -        |
| C | 1.775628 | 1.563431 | 0.609007 |
|   | -        | -        | -        |
| C | 1.088927 | 2.219575 | 0.01373  |
| C | 0.090357 | 2.401559 | -0.95788 |
|   | -        | -        | -        |
| C | 0.955205 | 1.169442 | 0.985883 |
|   | -        | -        | -        |
| C | 0.208582 | 0.118641 | 1.257261 |
|   | -        | -        | -        |
| C | 2.276478 | 1.222703 | 0.775293 |
|   | -        | -        | -        |
| C | 3.225619 | 0.042666 | 0.718496 |
|   | -        | -        | -        |
| C | 2.426668 | 1.270162 | 0.589183 |
|   | -        | -        | -        |
| C | 1.18197  | 1.295298 | 1.481636 |
|   | -        | -        | -        |
| C | 5.131961 | 0.835812 | 0.842879 |
| C | 4.118966 | 0.261813 | 0.532407 |
| O | 3.331045 | 0.362064 | 1.726545 |
|   | -        | -        | -        |
| C | 4.151993 | 2.020068 | 0.150019 |
|   | -        | -        | -        |
| C | 3.252644 | 0.984013 | 1.91893  |
|   | -        | -        | -        |
| C | 0.339566 | 0.545554 | 1.195252 |
|   | -        | -        | -        |
| C | 4.10334  | 0.04648  | 1.986926 |
|   | -        | -        | -        |
| H | 2.112634 | 0.996568 | 1.383937 |
|   | -        | -        | -        |
| O | 5.87689  | 0.507426 | 2.003648 |
|   | -        | -        | -        |
| O | 5.190537 | 0.594486 | 0.626284 |

|   |               |               |               |
|---|---------------|---------------|---------------|
| O | -<br>3.877739 | -<br>2.784109 | -0.28851      |
| H | -<br>0.322926 | -<br>0.030679 | -<br>2.210315 |
| H | -2.89133      | -<br>1.788826 | 1.241562      |
| H | -<br>4.134481 | -<br>0.387793 | -<br>1.144707 |
| H | -<br>2.023707 | -<br>1.512345 | -<br>1.677849 |
| H | -1.19263      | -<br>2.481166 | -<br>0.463658 |
| H | -<br>0.712175 | -<br>2.189049 | -<br>1.042617 |
| H | -<br>1.744022 | -<br>3.093097 | -<br>0.053572 |
| H | 0.682399      | 3.284437      | -0.69026      |
| H | -0.31939      | 2.581998      | -<br>1.963753 |
| H | 2.739917      | 2.203447      | -<br>0.639397 |
| H | 2.143958      | -<br>1.393625 | 0.458769      |
| H | 3.069341      | -<br>2.120108 | -0.84829      |
| H | 0.665704      | -<br>2.252782 | -<br>1.362802 |
| H | 1.503436      | -<br>1.261814 | -<br>2.530114 |
| H | 4.608055      | -<br>1.795981 | 0.965699      |
| H | 5.849941      | -<br>0.940246 | 0.025218      |
| H | 4.68035       | 1.200202      | 0.389685      |
| H | 2.659776      | 1.046391      | 1.571504      |
| H | -<br>4.102339 | -<br>2.087161 | -<br>1.243696 |
| H | -<br>5.193026 | -<br>1.844163 | -<br>0.133598 |
| H | -<br>3.850184 | -<br>2.98687  | -<br>0.26436  |
| H | -<br>4.273421 | -<br>1.115942 | -<br>2.285331 |

|   |          |          |          |          |
|---|----------|----------|----------|----------|
| H | -        | 2.850649 | 0.100443 | 2.418315 |
| H | -        | 2.661945 | 1.84932  | 2.235851 |
| H | -        | 1.089907 | 0.540244 | 1.985018 |
| H | 0.168189 | -        | 1.514138 | 1.237962 |
| H | 0.404623 | 0.215787 | -        | 1.440221 |
| H | 4.67325  | 0.979357 | -        | 2.070367 |
| H | 4.814048 | 0.787094 | -        | 1.986488 |
| H | 3.481053 | 0.040602 | -        | 2.882697 |
| H | 5.213135 | 0.226616 | -        | 2.656213 |
| H | -        | -        | -        | 0.436816 |
| H | 5.471101 | 1.506088 | -        | 0.00763  |
| H | -        | -        | -        | 0.00763  |
| H | 3.450674 | 3.601811 | -        | 0.00763  |

**Table S10. Cartesian coordinates and equilibrium populations of low-energy conformers (>1%) of 7 in MeOH.**

| <b>Conformer 1 P (%) = 41.59%</b> |          |          |          | <b>Conformer 2 P (%) = 31.94%</b> |          |          |          |
|-----------------------------------|----------|----------|----------|-----------------------------------|----------|----------|----------|
| C                                 | 3.66905  | 1.904864 | -0.98055 | C                                 | 3.667379 | 1.92697  | -0.9347  |
| C                                 | 4.758023 | 0.975125 | -0.44416 | C                                 | 4.755696 | 0.979015 | -0.4298  |
| C                                 | 4.251895 | -0.00039 | 0.660289 | C                                 | 4.261166 | -0.00315 | 0.662798 |
| C                                 | 2.961154 | -0.72897 | 0.126856 | C                                 | 2.968581 | -0.72411 | 0.120776 |
| C                                 | 1.836003 | 0.15692  | -0.52226 | C                                 | 1.840641 | 0.171296 | -0.51197 |
| C                                 | 2.489408 | 1.109664 | -1.55068 | C                                 | 2.489899 | 1.143884 | -1.52434 |
| C                                 | 2.352362 | -1.72701 | 1.129314 | C                                 | 2.360833 | -1.73386 | 1.11169  |
| C                                 | 1.329823 | -2.64613 | 0.437727 | C                                 | 1.336676 | -2.64298 | 0.409241 |
| C                                 | 0.300099 | -1.88851 | -0.36929 | C                                 | 0.306797 | -1.87612 | -0.38902 |
| C                                 | 0.871754 | -0.8273  | -1.29712 | C                                 | 0.877109 | -0.80127 | -1.30192 |
| C                                 | -1.00332 | -2.19388 | -0.30054 | C                                 | -0.99613 | -2.1848  | -0.3258  |
| C                                 | -2.08809 | -1.57413 | -1.16732 | C                                 | -2.08142 | -1.55819 | -1.18682 |
| C                                 | -1.40671 | -1.02188 | -2.44274 | C                                 | -1.39957 | -0.98361 | -2.45207 |
| C                                 | -0.21389 | -0.11067 | -2.1343  | C                                 | -0.21059 | -0.0733  | -2.12642 |
| C                                 | 5.367013 | -1.05163 | 0.878762 | C                                 | 5.375363 | -1.06154 | 0.859964 |
| C                                 | 4.071497 | 0.748525 | 2.0007   | C                                 | 4.08622  | 0.727208 | 2.013334 |
| O                                 | 5.916417 | 1.708706 | -0.03576 | O                                 | 5.875813 | 1.697754 | 0.095263 |

|   |          |          |          |   |          |          |          |
|---|----------|----------|----------|---|----------|----------|----------|
| C | 1.024542 | 0.973185 | 0.509624 | C | 1.028274 | 0.96883  | 0.533968 |
| C | -2.76919 | -0.43635 | -0.35188 | C | -2.7721  | -0.43587 | -0.35803 |
| C | -3.11279 | -2.65954 | -1.55827 | C | -3.0988  | -2.64385 | -1.59611 |
| C | -3.90176 | 0.312996 | -1.05198 | C | -3.91082 | 0.31177  | -1.05004 |
| O | -3.32754 | -1.02945 | 0.853742 | O | -3.32565 | -1.0477  | 0.840349 |
| O | -4.35561 | 1.407976 | -0.23039 | O | -4.37345 | 1.39414  | -0.21688 |
| C | -3.57649 | 2.520577 | -0.23976 | C | -3.604   | 2.513618 | -0.21578 |
| C | -4.04676 | 3.511987 | 0.792637 | C | -4.07979 | 3.489015 | 0.829216 |
| O | -2.61883 | 2.662532 | -0.97025 | O | -2.64979 | 2.672011 | -0.94734 |
| C | -3.11075 | -0.40668 | 2.035786 | C | -3.11594 | -0.43511 | 2.029205 |
| O | -2.47513 | 0.616905 | 2.173104 | O | -2.49202 | 0.594013 | 2.177371 |
| C | -3.77668 | -1.16917 | 3.157943 | C | -3.77311 | -1.21698 | 3.14315  |
| H | 4.109539 | 2.540655 | -1.75798 | H | 4.095011 | 2.584033 | -1.70694 |
| H | 3.326667 | 2.582478 | -0.18489 | H | 3.341372 | 2.583887 | -0.11972 |
| H | 5.117776 | 0.361481 | -1.28128 | H | 5.087369 | 0.365664 | -1.28795 |
| H | 3.341925 | -1.33751 | -0.71111 | H | 3.344956 | -1.32248 | -0.72651 |
| H | 2.853944 | 0.516199 | -2.40338 | H | 2.853431 | 0.56663  | -2.3888  |
| H | 1.738725 | 1.799389 | -1.95317 | H | 1.73758  | 1.840159 | -1.91176 |
| H | 1.866158 | -1.19506 | 1.95515  | H | 1.877859 | -1.21248 | 1.945775 |
| H | 3.135479 | -2.34779 | 1.577359 | H | 3.143581 | -2.36187 | 1.549896 |
| H | 0.836977 | -3.29802 | 1.169245 | H | 0.84342  | -3.30326 | 1.132939 |
| H | 1.883573 | -3.30876 | -0.24774 | H | 1.889404 | -3.29802 | -0.2844  |
| H | 1.522991 | -1.3663  | -2.00727 | H | 1.52775  | -1.32883 | -2.02126 |
| H | -1.32642 | -2.96727 | 0.396263 | H | -1.31846 | -2.96737 | 0.361041 |
| H | -2.12726 | -0.49286 | -3.07806 | H | -2.12078 | -0.44689 | -3.08022 |
| H | -1.06507 | -1.88822 | -3.02515 | H | -1.05371 | -1.83937 | -3.04757 |
| H | -0.57651 | 0.789132 | -1.62817 | H | -0.5771  | 0.815411 | -1.60359 |
| H | 0.224021 | 0.234932 | -3.0776  | H | 0.226137 | 0.291313 | -3.06316 |
| H | 5.464697 | -1.71673 | 0.011453 | H | 5.480554 | -1.70213 | -0.02511 |
| H | 6.324631 | -0.54177 | 1.021194 | H | 6.33207  | -0.55981 | 1.030679 |
| H | 5.182558 | -1.67388 | 1.760887 | H | 5.178646 | -1.7078  | 1.721622 |
| H | 5.051407 | 1.030852 | 2.402212 | H | 5.064406 | 1.034815 | 2.392552 |
| H | 3.473646 | 1.660716 | 1.91739  | H | 3.474658 | 1.629284 | 1.943012 |
| H | 3.591031 | 0.111748 | 2.749938 | H | 3.627756 | 0.06799  | 2.757841 |
| H | 5.624206 | 2.375651 | 0.605411 | H | 6.188793 | 2.293864 | -0.60234 |
| H | 1.664909 | 1.582195 | 1.148802 | H | 1.668279 | 1.56577  | 1.184228 |
| H | 0.335284 | 1.661317 | 0.009822 | H | 0.338795 | 1.664664 | 0.045234 |
| H | 0.420789 | 0.337766 | 1.163571 | H | 0.424329 | 0.321219 | 1.175612 |
| H | -2.01533 | 0.285201 | -0.04256 | H | -2.02436 | 0.288378 | -0.04004 |
| H | -3.64379 | -3.03938 | -0.67969 | H | -3.6308  | -3.03829 | -0.72456 |
| H | -3.85628 | -2.27691 | -2.26826 | H | -3.84188 | -2.25588 | -2.30365 |
| H | -2.60265 | -3.50195 | -2.03816 | H | -2.58222 | -3.47697 | -2.08523 |
| H | -3.57544 | 0.699969 | -2.0187  | H | -3.58775 | 0.711586 | -2.0126  |

|   |          |          |          |   |          |          |          |
|---|----------|----------|----------|---|----------|----------|----------|
| H | -4.7797  | -0.32237 | -1.17935 | H | -4.78352 | -0.32945 | -1.18407 |
| H | -5.1383  | 3.563566 | 0.82393  | H | -3.72223 | 3.137655 | 1.804027 |
| H | -3.69466 | 3.169322 | 1.772519 | H | -3.66224 | 4.476338 | 0.627197 |
| H | -3.62057 | 4.493391 | 0.580094 | H | -5.17164 | 3.531139 | 0.863892 |
| H | -3.55146 | -0.68753 | 4.109977 | H | -3.55372 | -0.74247 | 4.100111 |
| H | -4.86035 | -1.18967 | 3.000504 | H | -4.85644 | -1.24874 | 2.985199 |
| H | -3.42869 | -2.20693 | 3.17054  | H | -3.41271 | -2.25057 | 3.145278 |

| <b>Conformer 3 P (%) = 22.25%</b> |          |          |          | <b>Conformer 4 P (%) = 4.22%</b> |          |          |          |
|-----------------------------------|----------|----------|----------|----------------------------------|----------|----------|----------|
| C                                 | 3.663293 | 1.936382 | -0.93258 | C                                | -4.28643 | 1.764643 | 0.88492  |
| C                                 | 4.754058 | 0.994161 | -0.43769 | C                                | -5.26185 | 0.68131  | 0.442175 |
| C                                 | 4.261917 | 0.000931 | 0.659298 | C                                | -4.69881 | -0.21917 | -0.69881 |
| C                                 | 2.969254 | -0.72479 | 0.121987 | C                                | -3.28431 | -0.75688 | -0.2557  |
| C                                 | 1.840213 | 0.171685 | -0.50852 | C                                | -2.26013 | 0.275414 | 0.339998 |
| C                                 | 2.487271 | 1.148926 | -1.51744 | C                                | -2.98363 | 1.144967 | 1.395937 |
| C                                 | 2.359745 | -1.73392 | 1.113804 | C                                | -2.58801 | -1.63006 | -1.31564 |
| C                                 | 1.335096 | -2.64272 | 0.411401 | C                                | -1.43106 | -2.4203  | -0.68649 |
| C                                 | 0.306148 | -1.87598 | -0.38794 | C                                | -0.48373 | -1.5753  | 0.138624 |
| C                                 | 0.877605 | -0.80102 | -1.29981 | C                                | -1.12943 | -0.55686 | 1.065972 |
| C                                 | -0.99669 | -2.18498 | -0.32549 | C                                | 0.836272 | -1.80991 | 0.110079 |
| C                                 | -2.08124 | -1.55819 | -1.18719 | C                                | 1.872102 | -1.23722 | 1.056629 |
| C                                 | -1.39821 | -0.98323 | -2.4517  | C                                | 1.161757 | -0.47029 | 2.203024 |
| C                                 | -0.20933 | -0.07299 | -2.12528 | C                                | -0.07324 | 0.324197 | 1.761909 |
| C                                 | 5.370268 | -1.06437 | 0.851737 | C                                | -5.64932 | -1.4332  | -0.84666 |
| C                                 | 4.090988 | 0.726695 | 2.011051 | C                                | -4.72061 | 0.540586 | -2.04266 |
| O                                 | 5.84011  | 1.814759 | -0.00121 | O                                | -6.47726 | 1.342256 | 0.084132 |
| C                                 | 1.025567 | 0.96505  | 0.538941 | C                                | -1.61912 | 1.183075 | -0.73906 |
| C                                 | -2.77244 | -0.43627 | -0.35832 | C                                | 2.926465 | -0.33909 | 0.342382 |
| C                                 | -3.09831 | -2.64373 | -1.59756 | C                                | 2.649482 | -2.4221  | 1.69014  |
| C                                 | -3.91061 | 0.311827 | -1.05074 | C                                | 3.522956 | -0.94571 | -0.92943 |
| O                                 | -3.32722 | -1.04867 | 0.83933  | O                                | 2.32832  | 0.925731 | -0.04841 |
| O                                 | -4.37316 | 1.394252 | -0.21771 | O                                | 4.556434 | -0.09373 | -1.45729 |
| C                                 | -3.60262 | 2.513217 | -0.21632 | C                                | 5.785366 | -0.2254  | -0.88812 |
| C                                 | -4.07889 | 3.489946 | 0.827161 | C                                | 6.722885 | 0.840788 | -1.39296 |
| O                                 | -2.64727 | 2.66989  | -0.94664 | O                                | 6.0547   | -1.07696 | -0.07023 |
| C                                 | -3.11824 | -0.4369  | 2.028737 | C                                | 3.048372 | 2.058224 | 0.147493 |
| O                                 | -2.49199 | 0.590556 | 2.17852  | O                                | 4.13323  | 2.102176 | 0.686369 |
| C                                 | -3.77996 | -1.21716 | 3.141165 | C                                | 2.30124  | 3.255893 | -0.39159 |
| H                                 | 4.097284 | 2.594101 | -1.69479 | H                                | -4.76349 | 2.356333 | 1.674821 |
| H                                 | 3.337115 | 2.588809 | -0.11385 | H                                | -4.09618 | 2.454773 | 0.054039 |
| H                                 | 5.081968 | 0.38627  | -1.30073 | H                                | -5.44642 | 0.025696 | 1.312774 |
| H                                 | 3.343704 | -1.32332 | -0.72635 | H                                | -3.51475 | -1.42806 | 0.589705 |

|   |          |          |          |   |          |          |          |
|---|----------|----------|----------|---|----------|----------|----------|
| H | 2.848687 | 0.575786 | -2.38555 | H | -3.21293 | 0.521401 | 2.273714 |
| H | 1.731715 | 1.844396 | -1.89998 | H | -2.31481 | 1.937554 | 1.75054  |
| H | 1.877243 | -1.21044 | 1.946793 | H | -2.21204 | -1.00746 | -2.13548 |
| H | 3.138432 | -2.36524 | 1.554811 | H | -3.29131 | -2.33908 | -1.76501 |
| H | 0.841471 | -3.30208 | 1.135688 | H | -0.87475 | -2.97356 | -1.45318 |
| H | 1.888025 | -3.29872 | -0.28124 | H | -1.87183 | -3.18016 | -0.01983 |
| H | 1.528999 | -1.328   | -2.01892 | H | -1.65121 | -1.13575 | 1.848849 |
| H | -1.31951 | -2.96735 | 0.361378 | H | 1.201076 | -2.57459 | -0.57872 |
| H | -2.11889 | -0.44626 | -3.08018 | H | 1.877165 | 0.19548  | 2.703465 |
| H | -1.05217 | -1.83891 | -3.04725 | H | 0.853854 | -1.20942 | 2.955001 |
| H | -0.57617 | 0.815954 | -1.60319 | H | 0.246317 | 1.119161 | 1.086721 |
| H | 0.228387 | 0.291303 | -3.06157 | H | -0.51564 | 0.806673 | 2.641154 |
| H | 5.521571 | -1.65955 | -0.05766 | H | -5.65863 | -2.05292 | 0.058844 |
| H | 6.327172 | -0.5922  | 1.109082 | H | -6.67844 | -1.10398 | -1.03957 |
| H | 5.142666 | -1.75284 | 1.671176 | H | -5.37401 | -2.07402 | -1.68989 |
| H | 5.064977 | 1.068242 | 2.373823 | H | -5.7551  | 0.722207 | -2.34845 |
| H | 3.454084 | 1.610782 | 1.947835 | H | -4.23688 | 1.518609 | -1.99384 |
| H | 3.66574  | 0.058016 | 2.76683  | H | -4.2336  | -0.03905 | -2.83368 |
| H | 6.604203 | 1.240987 | 0.159615 | H | -7.1624  | 0.66782  | -0.03715 |
| H | 1.662552 | 1.569323 | 1.185249 | H | -2.35329 | 1.58578  | -1.43773 |
| H | 0.330967 | 1.655344 | 0.049885 | H | -1.11944 | 2.040217 | -0.27553 |
| H | 0.426667 | 0.315756 | 1.183593 | H | -0.86173 | 0.650071 | -1.32245 |
| H | -2.02485 | 0.287658 | -0.03931 | H | 3.731936 | -0.11857 | 1.046254 |
| H | -2.58147 | -3.47666 | -2.08676 | H | 3.174061 | -3.02886 | 0.945233 |
| H | -3.63094 | -3.03851 | -0.72655 | H | 3.393631 | -2.06225 | 2.410497 |
| H | -3.84086 | -2.25541 | -2.30543 | H | 1.952256 | -3.08039 | 2.218481 |
| H | -3.58699 | 0.711556 | -2.01316 | H | 3.935104 | -1.93749 | -0.73866 |
| H | -4.78343 | -0.32915 | -1.18518 | H | 2.768812 | -0.99474 | -1.71661 |
| H | -3.66001 | 4.47662  | 0.624777 | H | 6.605365 | 0.992257 | -2.46944 |
| H | -5.17075 | 3.533178 | 0.860279 | H | 6.469664 | 1.780645 | -0.88912 |
| H | -3.72302 | 3.139238 | 1.802832 | H | 7.751417 | 0.56795  | -1.15311 |
| H | -3.5573  | -0.74617 | 4.099119 | H | 2.103866 | 3.122944 | -1.46016 |
| H | -4.86356 | -1.24106 | 2.983509 | H | 2.894963 | 4.156435 | -0.23122 |
| H | -3.42673 | -2.2532  | 3.140797 | H | 1.332625 | 3.356888 | 0.109207 |

**Table S11. Cartesian coordinates and equilibrium populations of low-energy conformers (>1%) of 8 in MeOH.**

| Conformer 1 P (%) = 59.18% |       |       |       | Conformer 2 P (%) = 37.84% |       |        |        |
|----------------------------|-------|-------|-------|----------------------------|-------|--------|--------|
| C                          | 3.385 | 1.102 | 0.22  | C                          | 3.331 | 1.114  | 0.072  |
| C                          | 3.891 | 0.061 | -0.79 | C                          | 3.783 | -0.118 | -0.725 |

|   |        |        |        |   |        |        |        |
|---|--------|--------|--------|---|--------|--------|--------|
| C | 3.108  | -1.272 | -0.723 | C | 2.9    | -1.365 | -0.472 |
| C | 1.565  | -0.964 | -0.82  | C | 1.394  | -0.975 | -0.695 |
| C | 0.976  | 0.199  | 0.056  | C | 0.874  | 0.362  | -0.055 |
| C | 1.905  | 1.435  | -0.038 | C | 1.892  | 1.5    | -0.307 |
| C | 0.668  | -2.212 | -0.701 | C | 0.395  | -2.124 | -0.43  |
| C | -0.769 | -1.94  | -1.164 | C | -1.004 | -1.809 | -0.981 |
| C | -1.368 | -0.629 | -0.686 | C | -1.491 | -0.41  | -0.666 |
| C | -0.437 | 0.569  | -0.518 | C | -0.471 | 0.719  | -0.767 |
| C | -2.702 | -0.561 | -0.455 | C | -2.784 | -0.204 | -0.333 |
| C | -3.448 | 0.702  | -0.042 | C | -3.37  | 1.162  | -0.029 |
| C | -2.563 | 1.943  | -0.297 | C | -2.519 | 2.243  | -0.737 |
| C | -1.133 | 1.741  | 0.214  | C | -1.031 | 2.114  | -0.402 |
| C | -4.656 | 1.736  | 2.037  | C | -4.225 | 0.443  | 2.365  |
| C | -3.846 | 0.556  | 1.453  | C | -3.392 | 1.419  | 1.504  |
| C | 3.519  | -2.101 | -1.97  | C | 3.295  | -2.419 | -1.538 |
| C | 3.489  | -2.077 | 0.561  | C | 3.155  | -1.975 | 0.941  |
| C | 0.817  | -0.198 | 1.546  | C | 0.621  | 0.243  | 1.473  |
| C | -4.718 | 0.8    | -0.914 | C | -4.801 | 1.235  | -0.602 |
| H | 1.438  | -0.615 | -1.847 | H | 1.338  | -0.796 | -1.772 |
| O | -5.051 | 1.448  | 3.365  | O | -3.609 | -0.827 | 2.467  |
| O | 4.807  | -2.601 | 0.518  | O | 4.461  | -2.509 | 1.086  |
| O | 4.168  | 2.281  | 0.122  | O | 4.205  | 2.2    | -0.195 |
| H | -0.267 | 0.931  | -1.533 | H | -0.252 | 0.791  | -1.833 |
| H | 3.516  | 0.736  | 1.237  | H | 3.403  | 0.918  | 1.141  |
| H | 4.96   | -0.11  | -0.654 | H | 4.83   | -0.339 | -0.52  |
| H | 3.793  | 0.478  | -1.795 | H | 3.744  | 0.129  | -1.788 |
| H | 1.577  | 2.205  | 0.662  | H | 1.595  | 2.396  | 0.241  |
| H | 1.812  | 1.875  | -1.032 | H | 1.867  | 1.77   | -1.364 |
| H | 0.657  | -2.576 | 0.326  | H | 0.329  | -2.335 | 0.636  |
| H | 1.064  | -3.035 | -1.295 | H | 0.737  | -3.05  | -0.889 |
| H | -1.4   | -2.778 | -0.863 | H | -1.709 | -2.556 | -0.612 |
| H | -0.786 | -1.932 | -2.254 | H | -0.985 | -1.921 | -2.065 |
| H | -3.285 | -1.463 | -0.575 | H | -3.442 | -1.061 | -0.283 |
| H | -3.002 | 2.835  | 0.149  | H | -2.873 | 3.239  | -0.469 |
| H | -2.516 | 2.148  | -1.368 | H | -2.637 | 2.162  | -1.819 |
| H | -1.173 | 1.574  | 1.288  | H | -0.892 | 2.347  | 0.65   |
| H | -0.568 | 2.662  | 0.069  | H | -0.473 | 2.883  | -0.937 |
| H | -5.566 | 1.915  | 1.466  | H | -5.232 | 0.308  | 1.972  |
| H | -4.08  | 2.662  | 2.048  | H | -4.332 | 0.838  | 3.377  |
| H | -2.951 | 0.407  | 2.057  | H | -3.788 | 2.421  | 1.672  |
| H | -4.432 | -0.357 | 1.57   | H | -2.377 | 1.444  | 1.902  |
| H | 3.167  | -1.641 | -2.894 | H | 3.031  | -2.09  | -2.544 |
| H | 3.124  | -3.116 | -1.936 | H | 2.814  | -3.38  | -1.367 |

|   |        |        |        |   |        |        |        |
|---|--------|--------|--------|---|--------|--------|--------|
| H | 4.602  | -2.186 | -2.058 | H | 4.371  | -2.6   | -1.543 |
| H | 2.83   | -2.934 | 0.695  | H | 2.468  | -2.799 | 1.136  |
| H | 3.437  | -1.48  | 1.466  | H | 3.032  | -1.255 | 1.742  |
| H | 0.054  | -0.962 | 1.69   | H | -0.129 | -0.509 | 1.716  |
| H | 0.528  | 0.655  | 2.158  | H | 0.269  | 1.179  | 1.902  |
| H | 1.733  | -0.567 | 1.991  | H | 1.516  | 0.006  | 2.034  |
| H | -5.401 | -0.029 | -0.723 | H | -5.438 | 0.441  | -0.214 |
| H | -4.474 | 0.785  | -1.977 | H | -4.798 | 1.137  | -1.688 |
| H | -5.264 | 1.725  | -0.728 | H | -5.273 | 2.187  | -0.361 |
| H | -4.253 | 1.391  | 3.914  | H | -2.748 | -0.711 | 2.902  |
| H | 5.436  | -1.863 | 0.546  | H | 5.096  | -1.776 | 1.089  |
| H | 4.082  | 2.642  | -0.775 | H | 4.166  | 2.409  | -1.143 |

| <b>Conformer 3 P (%) = 2.97%</b> |        |        |        |
|----------------------------------|--------|--------|--------|
| C                                | 3.57   | 1.178  | -0.33  |
| C                                | 3.964  | -0.123 | -1.046 |
| C                                | 3.103  | -1.331 | -0.615 |
| C                                | 1.585  | -0.945 | -0.786 |
| C                                | 1.1    | 0.432  | -0.199 |
| C                                | 2.105  | 1.537  | -0.619 |
| C                                | 0.578  | -2.075 | -0.473 |
| C                                | -0.807 | -1.767 | -1.047 |
| C                                | -1.286 | -0.407 | -0.598 |
| C                                | -0.313 | 0.747  | -0.81  |
| C                                | -2.509 | -0.271 | -0.039 |
| C                                | -3.083 | 1.05   | 0.442  |
| C                                | -1.934 | 2.039  | 0.727  |
| C                                | -0.924 | 2.119  | -0.425 |
| C                                | -5.132 | -0.043 | 1.661  |
| C                                | -3.878 | 0.852  | 1.759  |
| C                                | 3.455  | -2.484 | -1.588 |
| C                                | 3.561  | -1.764 | 0.81   |
| C                                | 0.981  | 0.418  | 1.343  |
| C                                | -4.005 | 1.612  | -0.661 |
| H                                | 1.498  | -0.808 | -1.866 |
| O                                | -5.73  | -0.141 | 2.939  |
| O                                | 2.816  | -2.854 | 1.315  |
| O                                | 4.393  | 2.237  | -0.789 |
| H                                | -0.156 | 0.805  | -1.888 |
| H                                | 3.729  | 1.093  | 0.745  |
| H                                | 5.02   | -0.34  | -0.876 |
| H                                | 3.862  | 0.027  | -2.123 |

|   |        |        |        |
|---|--------|--------|--------|
| H | 1.877  | 2.476  | -0.114 |
| H | 1.991  | 1.733  | -1.687 |
| H | 0.484  | -2.223 | 0.602  |
| H | 0.91   | -3.025 | -0.885 |
| H | -0.768 | -1.784 | -2.137 |
| H | -1.509 | -2.548 | -0.751 |
| H | -3.112 | -1.161 | 0.069  |
| H | -2.338 | 3.033  | 0.924  |
| H | -1.419 | 1.746  | 1.641  |
| H | -0.162 | 2.854  | -0.18  |
| H | -1.429 | 2.532  | -1.298 |
| H | -4.889 | -1.05  | 1.324  |
| H | -5.869 | 0.378  | 0.977  |
| H | -4.181 | 1.832  | 2.133  |
| H | -3.208 | 0.442  | 2.518  |
| H | 2.972  | -3.422 | -1.318 |
| H | 4.53   | -2.677 | -1.597 |
| H | 3.163  | -2.248 | -2.612 |
| H | 3.532  | -0.957 | 1.535  |
| H | 4.604  | -2.082 | 0.777  |
| H | 1.911  | 0.175  | 1.843  |
| H | 0.227  | -0.287 | 1.694  |
| H | 0.704  | 1.403  | 1.718  |
| H | -4.817 | 0.925  | -0.9   |
| H | -4.453 | 2.558  | -0.355 |
| H | -3.467 | 1.791  | -1.592 |
| H | -6.516 | -0.707 | 2.858  |
| H | 3.164  | -3.074 | 2.195  |
| H | 5.313  | 2.032  | -0.557 |

#### 4. Bioactivity Assay

Figure S87. The cytotoxicity of Pubescens B (2) and pubescens H (8).

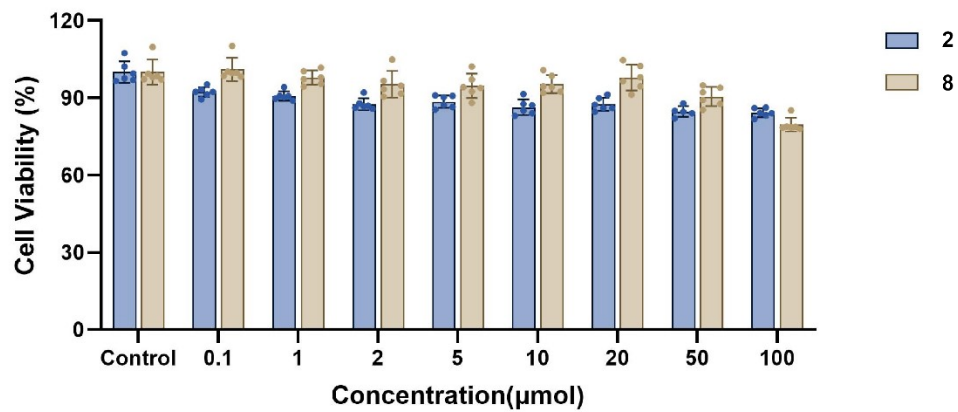

Supplement: d5ra09664b4.pdf [file d5ra09664b4.pdf]
